# Supplementary material for: Multivalent resorcinarene clusters decorated with DAB-1 inhitopes: targeting Golgi α-mannosidase fromDrosophila melanogaster
Source: Royal Society of Chemistry journal article supplement (doi:10.1039/d1qo01048d), 2021-01-01
Supplement: d1qo01048d1.pdf [file d1qo01048d1.pdf]

## Supplementary Materials

### Multivalent Resorcinarene Clusters Decorated with DAB-1 Inhitopes: Targeting Golgi $\alpha$ -Mannosidase from *Drosophila Melanogaster*

Paolo Della Sala,<sup>a,†</sup> Costanza Vanni,<sup>b,†</sup> Carmen Talotta,<sup>a</sup> Luca Di Marino,<sup>a</sup> Camilla Matassini,<sup>b,c</sup> Andrea Goti,<sup>b,c</sup> Placido Neri,<sup>a</sup> Sergej Šesták,<sup>d</sup> Francesca Cardona<sup>\*,b,c</sup> and Carmine Gaeta<sup>\*,a</sup>

a. Laboratory of Supramolecular Chemistry (SupraLab@UniSa), Dipartimento di Chimica e Biologia "A. Zambelli", Università di Salerno, Via Giovanni Paolo II 132, I-84984, Fisciano, Italy.

b. Dipartimento di Chimica "Ugo Schiff", Università degli Studi di Firenze (FI), via della Lastruccia 3-13, 50019 Sesto Fiorentino (FI), Italy

c. Associated with LENS, via N. Carrara 1, 50019 Sesto Fiorentino, FI, Italy.

d. Institute of Chemistry, Center for Glycomics, Slovak Academy of Sciences, Dubravská cesta 9, 84538, Bratislava, Slovakia.

† These authors equally contributed to this work.

| Table of contents                                                                                                              | Pages     |
|--------------------------------------------------------------------------------------------------------------------------------|-----------|
| General Experimental Details                                                                                                   | S2        |
| Synthesis of derivatives <b>7</b> , <b>3a</b> , <b>4a</b> , <b>5a</b> and <b>5b</b>                                            | S2-S7     |
| Copies of 1D, 2D NMR and HR mass spectra                                                                                       | S8-S24    |
| In Silico Studies                                                                                                              | S25       |
| Molecular Dynamics Optimized structures of <b>3a</b> , <b>4a</b> , <b>5a</b> and <b>5b</b>                                     | S26 - S56 |
| Molecular Dynamics of Ligand-Protein Complexes                                                                                 | S57-S63   |
| Docking Studies with VINA                                                                                                      | S63       |
| NBO and NCI Calculations                                                                                                       | S63-S64   |
| DFT structures of simplified models of the complex <b>5a@JB<math>\alpha</math>-man</b> and <b>5b@JB<math>\alpha</math>-man</b> | S64-S74   |
| Molecular Docking of <b>5a(DAB-1)<sub>1</sub></b> and <b>5b(DAB-1)<sub>1</sub></b>                                             | S74       |
| Biological Assays                                                                                                              | S75-S78   |

## General Experimental Details

All chemicals were reagent grade and were used without further purification. Reaction temperatures were measured externally; reactions were monitored by TLC on Merck silica gel plates (0.25 mm) and visualized by UV light and spraying with  $\text{H}_2\text{SO}_4\text{-Ce}(\text{SO}_4)_2$ . Chromatography was carried out on Silica Gel. Yields refer to chromatographically and spectroscopically pure compounds unless otherwise stated.  $^1\text{H}$  NMR spectra were recorded on a Varian Mercury-400 or on a Varian INOVA 400 instrument at 25 °C.  $^{13}\text{C}$  NMR spectra were recorded on a Varian Gemini-200. 1D and 2D NMR spectra were also recorded on a Bruker Avance-600 [600 ( $^1\text{H}$ ) and 150 MHz ( $^{13}\text{C}$ )], Avance-400 [400 ( $^1\text{H}$ ) and 100 MHz ( $^{13}\text{C}$ )] or Avance-300 MHz [300 ( $^1\text{H}$ ) and 75 MHz ( $^{13}\text{C}$ )]. Chemical shifts are reported relative to the residual solvent peak.<sup>1</sup> Standard pulse programs, provided by the manufacturer and integrals are in accordance with assignments, coupling constants are given in Hz. For detailed peak assignments 2D spectra were measured (COSY, HSQC). Small scale microwave assisted syntheses were carried out in a CEM Discover microwave apparatus for synthesis with an open reaction vessel and an external surface sensor. ESI-MS spectra were recorded with a Thermo Scientific™ LCQ Fleet Ion Trap Mass Spectrometer. Elemental analyses were performed with a PerkinElmer 2400 analyzer. HR MALDI mass spectra were recorded on a Bruker Solarix FT-ICR mass spectrometer equipped with a 7T magnet. All samples were recorded in MALDI (8 laser shots were used for each scan) and they were prepared by mixing 10  $\mu\text{L}$  of analyte in methanol (1 mg/mL) with 10  $\mu\text{L}$  of solution of 2,5-dihydroxybenzoic acid (10 mg/mL in Methanol). The mass spectra were calibrated externally, and a linear calibration was applied. Optical rotation measurements were performed on a JASCO DIP-370 polarimeter.

## Synthetic strategies to access compound 7

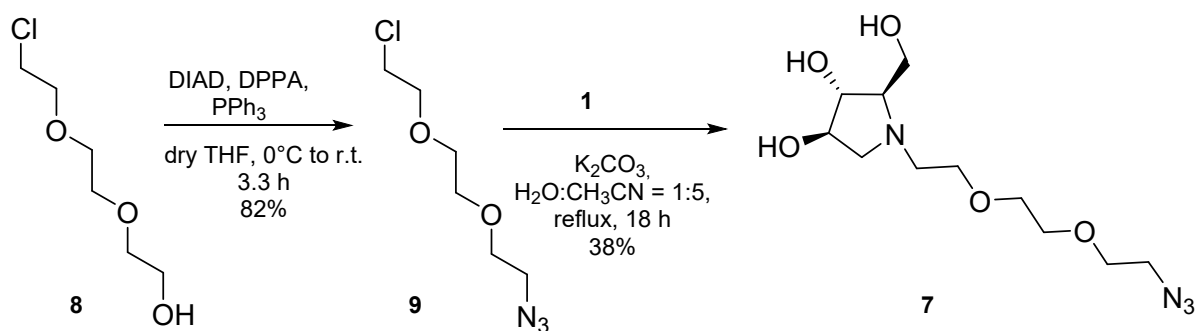

Starting from commercially available 2-[2-(2-chloroethoxy)ethoxy]ethanol (**8**), the azido moiety was introduced under Mitsunobu conditions through reaction with diphenyl phosphoryl azide (DPPA) in dry THF at room temperature, affording compound **9**<sup>2</sup> in 82% yield. Alkylation of DAB-1 (**1**)<sup>3</sup> with **9** was performed in a 1:5  $\text{CH}_3\text{CN}/\text{H}_2\text{O}$  mixture in the

<sup>1</sup> G. R. Fulmer, A. J. M. Miller, N. H. Sherden, H. E. Gottlieb, A. Nudelman, B. M. Stoltz, J. E. Bercaw and K. I. Goldberg, NMR Chemical Shifts of Trace Impurities: Common Laboratory Solvents, Organics, and Gases in Deuterated Solvents Relevant to the Organometallic Chemist. *Organometallics*, 2010, **29**, 2176–2179.

<sup>2</sup> S. P. Amaral, M. Fernandez-Villamarin, J. Correa, R. Riguera and E. Fernandez-Megia, Efficient multigram synthesis of the repeating unit of gallic acid-triethylene glycol dendrimers. *Org. Lett.*, 2011, **13**, 4522–4525

<sup>3</sup> C. Parmeggiani, S. Catarzi, C. Matassini, G. D'Adamio, A. Morrone, A. Goti, P. Paoli, F. Cardona, Human Acid  $\beta$ -Glucosidase Inhibition by Carbohydrate Derived Iminosugars: Towards New Pharmacological

presence of  $K_2CO_3$  as the base and heating at reflux for 18 h, thus affording compound **7** in 38% yield.

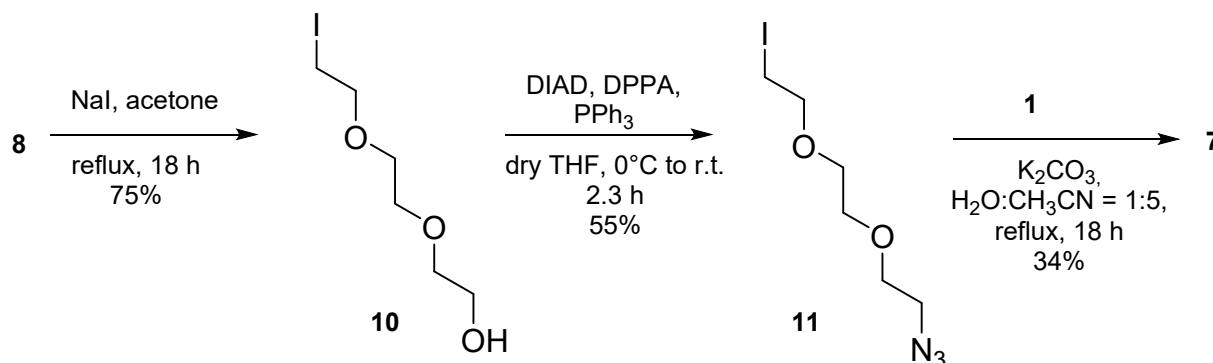

To improve the synthesis of the alkylation step, we tried an alternative strategy, namely replacement of alkylating reagent **9** with a compound bearing a better leaving group than chloride. Thus, compound **8** was converted into iodide **10**<sup>4</sup> through reaction with NaI in acetone at reflux, which proceeded with 75% yield. Azide introduction under Mitsunobu conditions, however, gave compound **11**<sup>5</sup> with a moderate 55% yield. The alkylation of DAB-1 (**1**) with iodide **11** also proceeded in moderate yield (34%), giving no advantage over the chloride derivative **9**.

## Synthesis of compound **7**

**1-Azido-2-(2-(2-chloroethoxy)ethoxy)ethane (**9**):** To a solution of **8** (280 mg, 1.66 mmol) in dry THF (15 mL) under a nitrogen atmosphere triphenylphosphine (1.30 g, 4.98 mmol) was added. The reaction mixture was cooled to 0 °C and DIAD (981  $\mu$ L, 4.98 mmol) was added dropwise, forming a yellow precipitate. After addition of diphenylphosphorilazide (1.19 mL, 5.31 mmol), the suspension was raised to room temp. and stirred under a nitrogen atmosphere for 4 h, until TLC analysis (EtP:AcOEt=10:1) showed the disappearance of the starting material ( $R_f = 0.52$ ) and formation of a new product ( $R_f = 0.78$ ). The solvent was removed under reduced pressure and the crude was purified by FCC (EtP:Et<sub>2</sub>O from 5:1 to 2:1) affording pure **9** ( $R_f = 0.31$ , 263 mg, 1.36 mmol, 82% yield) as a colorless oil. The spectrum is consistent with data reported in literature.<sup>6</sup> <sup>1</sup>H NMR (200 MHz,  $CDCl_3$ ):  $\delta$  3.80-3.60 (m, 10H, from H-1 to H-5), 3.39 (t,  $J = 5.0$  Hz, 2H, H-6) ppm.

**2-[2-(2-Iodoethoxy)ethoxy]ethanol (**10**):** 2-[2-(2-Chloroethoxy)ethoxy]ethanol (1.05 g, 6.23 mmol) and NaI (9 mg, 0.06 mmol) were refluxed overnight under stirring in acetone (6.3

Chaperones for Gaucher Disease. *ChemBioChem* 2015, **16**, 2054-2064.

<sup>4</sup> E. Ishow, A. Credi, V. Balzani, F. Spadola, L. Mandolini, A molecular-level plug/socket system: electronic energy transfer from a binaphthyl unit incorporated into a crown ether to an anthracenyl unit linked to an ammonium ion. *Chem. Eur. J.*, 1999, **5**, 984-989.

<sup>5</sup> L. Deng, O. Norberg, S. Uppalapati, M. Yan and O. Ramström, Stereoselective synthesis of light-activatable perfluorophenylazide-conjugated carbohydrates for glycoarray fabrication and evaluation of structural effects on protein binding by SPR imaging. *Org. Biomol. Chem.*, 2011, **9**, 3188-3198.

<sup>6</sup> S. P. Amaral, M. Fernandez-Villamarin, J. Correa, R. Riguera and E. Fernandez-Megia, Efficient multigram synthesis of the repeating unit of gallic acid-triethylene glycol dendrimers. *Org. Lett.*, 2011, **13**, 4522-4525

mL). After cooling, the slurry was taken up in the minimum amount of water and extracted with Et<sub>2</sub>O (3x5 mL). The organic layers were dried (Na<sub>2</sub>SO<sub>4</sub>), filtered, and evaporated to dryness to yield compound **10** (1.21 g, 75% yield), as a colorless oil, which was used in the next step without further purification. The spectrum is consistent with data reported in literature.<sup>4</sup> <sup>1</sup>H NMR (200 MHz, CDCl<sub>3</sub>): δ 3.79-3.59 (m, 12H, from H-1 to H-6), 2.46 (*brs*, 1H, OH) ppm.

**1-Azido-2-(2-(2-iodoethoxy)ethoxy)ethane (11)**: To a solution of **10** (296 mg, 1.14 mmol) in dry THF (15 mL) under a nitrogen atmosphere triphenylphosphine (896 mg, 3.41 mmol) was added. The reaction mixture was cooled to 0 °C and DIAD (672 μL, 3.41 mmol) was added dropwise, forming a yellow precipitate. After addition of diphenylphosphorilazide (815 μL, 3.64 mmol), the suspension was raised to room temp. and stirred under a nitrogen atmosphere for 3 h, until TLC analysis (EtP:AcOEt=10:1) showed the disappearance of the starting material (*R<sub>f</sub>* = 0.22) and formation of a new product (*R<sub>f</sub>* = 0.75). The solvent was removed under reduced pressure and the crude was purified by FCC (EtP:Et<sub>2</sub>O=10:1) affording pure **11** (*R<sub>f</sub>* = 0.29, 178 mg, 0.62 mmol, 55% yield) as a colorless oil. The spectrum is consistent with data reported in literature.<sup>5</sup> <sup>1</sup>H NMR (200 MHz, CDCl<sub>3</sub>) : δ 3.81-3.61 (m, 10H, from H-1 to H-5), 3.40 (t, *J* = 5.0 Hz, 2H, H-6) ppm.

**Procedure A** : **(2R,3R,4R)-1-(2-(2-(2-azidoethoxy)ethoxy)ethyl)-2-(hydroxymethyl)pyrrolidine-3,4-diol (7)**: A solution of **1** (60 mg, 0.45 mmol), 2-[2-(2-azidoethoxy)ethoxy]ethanol **9** (175 mg, 0.90 mmol) and K<sub>2</sub>CO<sub>3</sub> (93 mg, 0.68 mmol) in 2.4 mL of a mixture CH<sub>3</sub>CN/H<sub>2</sub>O 5:1 was stirred at reflux for 24 h, until a TLC analysis (CH<sub>2</sub>Cl<sub>2</sub>:MeOH:NH<sub>3</sub> 2:1:0.2) showed the disappearance of the starting material (*R<sub>f</sub>* = 0.10) and the formation of a new product (*R<sub>f</sub>* = 0.79). After filtration through Celite®, the solvent was removed under reduced pressure and the crude was purified by FCC (CH<sub>2</sub>Cl<sub>2</sub>:MeOH:NH<sub>3</sub> from 6:1:0.1 to 2:1:0.1) affording pure **7** (*R<sub>f</sub>* = 0.21, 50 mg, 0.17 mmol, 38% yield) as a yellow oil. [α]<sub>D</sub><sup>21</sup> = -41.5 (c = 0.68 in H<sub>2</sub>O); <sup>1</sup>H NMR (400 MHz, D<sub>2</sub>O): δ 4.00 (ps, 1H, H-4), 3.81 (ps, 1H, H-3), 3.61-3.54 (m, 10H, H-6, from H-2' to H-5'), 3.39 (t, *J* = 4.7 Hz, 2H, H-6'), 3.02-2.94 (m, 2H, Ha-5, Ha-1'), 2.71 (dd, *J* = 11.2, 5.7 Hz, 1H, Hb-5), 2.55-2.46 (m, 2H, H-2, Hb-1') ppm; <sup>13</sup>C{<sup>1</sup>H} NMR (50 MHz, D<sub>2</sub>O): δ = 78.9 (d, C-3), 75.5 (d, C-4), 72.0 (d, C-2), 69.6-68.7 (t, 4C, from C-2' to C-5'), 61.0 (t, C-6), 58.9 (t, C-5), 53.9 (t, C-1'), 50.2 (t, C-6') ppm; MS (ESI): *m/z* calcd (%) for C<sub>11</sub>H<sub>22</sub>N<sub>4</sub>O<sub>5</sub> 290.16; found: 313.04 (55%, [M+ Na]<sup>+</sup>), 291.06 (100%, [M+ H]<sup>+</sup>). Elemental analysis: C<sub>11</sub>H<sub>22</sub>N<sub>4</sub>O<sub>5</sub> (290.32) calcd.: C, 45.51; H, 7.64; N, 19.30; found C, 45.49; H, 7.48, N, 19.34.

**Procedure B** : **(2R,3R,4R)-1-(2-(2-(2-azidoethoxy)ethoxy)ethyl)-2-(hydroxymethyl)pyrrolidine-3,4-diol (7)**: A solution of **1** (60 mg, 0.45 mmol), 1-Azido-2-(2-(2-iodoethoxy)ethoxy)ethane **11** (178 mg, 0.62 mmol) and K<sub>2</sub>CO<sub>3</sub> (86 mg, 0.62 mmol) in 3.6 mL of a mixture CH<sub>3</sub>CN/H<sub>2</sub>O 5:1 was stirred at reflux for 72 h, until a TLC analysis (CH<sub>2</sub>Cl<sub>2</sub>:MeOH:NH<sub>3</sub>=2:1:0.2) showed the disappearance of the starting material (*R<sub>f</sub>* = 0.10) and the formation of a new product (*R<sub>f</sub>* = 0.83). After filtration through Celite®, the solvent was removed under reduced pressure and the crude was purified by FCC (CH<sub>2</sub>Cl<sub>2</sub>:MeOH:NH<sub>3</sub> from 6:1:0.1 to 2:1:0.1) affording pure **7** (*R<sub>f</sub>* = 0.21, 45 mg, 0.16 mmol, 34% yield) as a yellow oil.

## Synthesis of derivatives 3a, 4a, 5a and 5b

The syntheses of derivatives **3c**,<sup>7</sup> **4c**,<sup>8</sup> **5c**,<sup>8</sup> and **3d**<sup>9</sup> were described in literature.

**4d**: A suspension of **4c** (0.44 g, 0.81 mmol) and K<sub>2</sub>CO<sub>3</sub> (2.04 g, 14.7 mmol) in acetone (26 mL) was stirred at reflux for 1 h, then was cooled at 25 °C and propargyl bromide (0.74 mL, 9.89 mmol) was added. The reaction mixture was stirred at reflux for 24 h. Subsequently, the solvent was evaporated and the solid was dissolved in ethyl acetate (50 mL) and washed with an aqueous 1 M HCl solution (2 × 50 mL). The organic phase was dried with Na<sub>2</sub>SO<sub>4</sub> and evaporated to obtain a pale-yellow solid. Derivative **4d** was obtained in 81 % yield (0.56 g). Mp: > 250 °C dec. <sup>1</sup>H NMR (300 MHz, acetone-*d*<sub>6</sub>): δ 6.22 (s, ArH, 4H), 4.48 (d, *J* = 2.4 Hz, -OCH<sub>2</sub>-, 16H), 3.98 (s, -CH<sub>2</sub>-, 8H), 3.05 (t, *J* = 2.4 Hz, -C≡CH, 8H), 2.31 (s, -CH<sub>3</sub>, 12H) ppm; <sup>13</sup>C{<sup>1</sup>H} NMR (75 MHz, acetone-*d*<sub>6</sub>): δ 155.3, 130.7, 129.6, 125.4, 80.4, 76.8, 61.2, 11.1 ppm; DEPT-135 (75 MHz, acetone-*d*<sub>6</sub>): δ 129.6, 80.4, 76.8, 61.2, 30.8, 11.1; HRMS (MALDI) *m/z* [M+H]<sup>+</sup> calcd. for [C<sub>56</sub>H<sub>49</sub>O<sub>8</sub>]<sup>+</sup>: 849.3422; found: 849.3492.

**5d**: A suspension of **5c** (0.47 g, 0.58 mmol) and K<sub>2</sub>CO<sub>3</sub> (2.16 g, 15.6 mmol) in acetone (27 mL) was stirred at reflux for 1 h, then was cooled at 25 °C and propargyl bromide (0.70 mL, 9.29 mmol) was added. The reaction mixture was stirred at reflux for 24 h, then an additional portion of propargyl bromide (0.70 mL, 9.29 mmol) was added. After further 24 h, the solvent was evaporated and the solid was dissolved in ethyl acetate (50 mL) and washed with an aqueous 1 M HCl solution (2 × 100 mL). The organic phase was dried with Na<sub>2</sub>SO<sub>4</sub> and evaporated to obtain a pale-yellow solid. Derivative **5d** was obtained in 88 % yield (0.65 g). Mp: 210-215 °C dec. <sup>1</sup>H NMR (300 MHz, CDCl<sub>3</sub>): δ 6.35 (s, ArH, 6H), 4.40 (d, *J* = 2.4 Hz, -OCH<sub>2</sub>-, 24H), 3.89 (s, -CH<sub>2</sub>-, 12H), 3.03 (t, *J* = 2.4 Hz, -C≡CH, 12H), 2.24 (s, -CH<sub>3</sub>, 18H) ppm; <sup>13</sup>C{<sup>1</sup>H} NMR (100 MHz, CDCl<sub>3</sub>): δ 154.2, 129.8, 129.2, 125.3, 79.4, 75.3, 60.5, 30.4, 10.9 ppm; HRMS (MALDI) *m/z* [M+H]<sup>+</sup> calcd. for [C<sub>84</sub>H<sub>73</sub>O<sub>12</sub>]<sup>+</sup>: 1273.5097; found: 1273.5142.

**3a**: Derivative **3d** (4.0 mg, 4.7 μmol) and derivative **6**<sup>10</sup> (11.0 mg, 42.6 μmol) were dissolved in a mixture of THF/H<sub>2</sub>O (1.00 mL, 2:1 v/v) in an ACE pressure tube, and Cu<sub>2</sub>SO<sub>4</sub> · 5 H<sub>2</sub>O (0.6 mg, 2.4 μmol) and sodium ascorbate (0.4 mg, 2.0 μmol) were added. The reaction mixture was heated under microwave irradiation for 45 min at 80 °C. The reaction mixture was filtered through a short pad of Celite® and the filtrate was concentrated under reduced pressure to give a yellow solid. The mixture was purified through chromatographic column (silica gel, gradient: from MeOH to ammonia solution 4 M in MeOH) to give derivative **3a** in 27 % of yield (3.7 mg). Mp: > 200 °C dec. <sup>1</sup>H NMR (600 MHz, CD<sub>3</sub>OD): δ 8.09 (s, *H*-triazole,

<sup>7</sup> Tunstad, L. M.; Tucker, J. A.; Dalcanale, E.; Weiser, J.; Bryant, J. A.; Sherman, J. C.; Helgeson, R. C.; Knobler, C. B.; Cram, D. J. Host-guest complexation. 48. Octol building blocks for cavitands and carcerands. *J. Org. Chem.* 1989, **54**, 1305–1312.

<sup>8</sup> P. Della Sala, C. Gaeta, W. Navarra, C. Talotta, M. De Rosa, G. Brancatelli, S. Geremia and P. Neri, Improved Synthesis of Larger Resorcinarenes. *J. Org. Chem.*, 2016, **81**, 5726-5731.

<sup>9</sup> W. Liu, H. Yang, H., W. Wu, H. Gao, S. Xu, Q. Guo, Y. Liu, S. Xu, S. Cao, Calix[4]resorcinarene-based branched macromolecules for all-optical photorefractive application. *J. Mater. Chem. C* 2016, **4**, 10684-10692.

<sup>10</sup> G. D'Adamio, C. Matassini, C. Parmeggiani, S. Catarzi, A. Morrone, A. Goti, P. Paoli, F. Cardona, Evidence for a multivalent effect in inhibition of sulfatases involved in lysosomal storage disorders (LSDs). *RSC Adv.* 2016, **6**, 64847-64851.

4H), 7.36 (s, *H*-triazole, 4H), 7.22 (s, *ArH*, 2H), 6.99 (s, *ArH*, 2H), 6.72 (s, *ArH*, 2H), 5.98 (s, *ArH*, 2H), 5.21 and 5.14 (AB,  $J = 12.0$  Hz,  $-OCH_2$ -triazole, 8H), 4.89 (overlapped to signal of  $H_2O$ ,  $-OCH_2$ -triazole, 8H), 4.55 (q,  $J = 7.2$  Hz,  $Ar-CH(CH_3)-Ar$ , 4H), 4.45 (*broad*, 12H) 4.28 (*broad*, 8 H), 3.94-3.89 (overlapped,  $CH$ , 24H), 3.68-3.63 (overlapped,  $CH_2$ , 24H), 3.05-2.99 (m,  $CH_2$ , 12H), 2.86-2.79 (m,  $CH_2$ , 12H), 2.67-2.64 (m,  $CH_2$ , 12H), 2.45-2.33 (overlapped, 24H), 1.94-1.83 (overlapped,  $CH_2$ , 24H), 1.60-1.28 (overlapped to signal of grease  $CH_2$ , 12H) ppm;  $^{13}C\{^1H\}$  NMR (150 MHz,  $CD_3OD$ ):  $\delta$  148.0, 146.9, 137.9, 137.6, 125.5, 119.1, 119.0, 78.2, 75.0, 72.6, 62.9, 61.4, 61.4, 59.6, 56.0, 55.9, 52.1, 51.2, 32.7, 31.4, 30.5, 30.4, 29.7, 29.6, 29.4, 29.1, 22.6 ppm; HRMS (MALDI)  $m/z$   $[M+H]^+$  calcd. for  $[C_{144}H_{225}N_{32}O_{32}]^+$ : 2915.6991; found: 2915.7011;  $[\alpha]_{25}^D$  (c: 3.7 mg/mL) =  $-20.99^\circ$ .

**4a:** Derivative **4d** (4.06 mg, 4.80  $\mu$ mol) and derivative **6**<sup>10</sup> (9.98 mg, 38.6  $\mu$ mol) were dissolved in a mixture of THF/ $H_2O$  (1.00 mL, 2:1 v/v) in an ACE pressure tube and  $Cu_2SO_4 \cdot 5 H_2O$  (0.36 mg, 1.4  $\mu$ mol) and sodium ascorbate (0.57 mg, 2.9  $\mu$ mol) were added. The reaction mixture was heated under microwave irradiation for 45 min at 80° C. The reaction mixture was filtered through a short pad of Celite® and the filtrate was concentrated under reduced pressure to give a yellow solid. The mixture was purified through chromatographic column (silica gel, gradient: from MeOH to ammonia solution 4 M in MeOH) to give derivative **4a** with 44 % of yield (6.2 mg). Mp: > 230 °C dec.  $^1H$  NMR (600 MHz,  $CD_3OD$ ):  $\delta$  7.78 (s, *H*-triazole, 8H), 6.26 (s, *ArH*, 4H), 4.82 (overlapped to signal of  $H_2O$ ,  $-OCH_2$ -triazole, 16H), 4.34 (t,  $J = 7.4$  Hz, triazole- $CH_2$ , 16H), 3.95 (m,  $-CHOH$ , 8H), 3.90 (m,  $-CHOH$ , 8H), 3.80 (s,  $Ar-CH_2-Ar$ , 8H), 3.66 (m,  $N-CH-CH_2OH$ , 16H), 3.03 and 2.67 (AB,  $J = 10.2$  Hz,  $N-CH_2-CHOH$ , 16H), 2.82 and 2.36 (AB,  $CH_2-N$ , 16H), 2.48 (m,  $-CH-CH_2OH$ , 8H), 2.31 (overlapped,  $Ar-CH_3$ , 12H), 1.86 (m,  $CH_2$ , 16H), 1.48 (m,  $CH_2$ , 16H), 1.36-1.29 (overlapped,  $CH_2$ , 32H) ppm;  $^{13}C\{^1H\}$  NMR (100 MHz,  $CD_3OD$ ):  $\delta$  155.7, 145.1, 131.1, 130.2, 125.8, 125.4, 80.6, 77.3, 74.7, 66.7, 62.5, 60.5, 56.6, 51.3, 31.2, 28.7, 27.8, 27.4, 11.4 ppm; HRMS (MALDI)  $m/z$   $[M + H]^+$  calcd. for  $[C_{144}H_{225}N_{32}O_{32}]^+$ : 2915.6991; found: 2915.6979;  $[\alpha]_{25}^D$  (c: 4.1 mg/mL) =  $-21.01^\circ$ .

**5a:** Derivative **5d** (12.3 mg, 9.70  $\mu$ mol) and derivative **6**<sup>10</sup> (30.0 mg, 0.12 mmol) were dissolved in a mixture of THF/ $H_2O$  (1.00 mL, 2:1 v/v) in an ACE pressure tube and  $Cu_2SO_4 \cdot 5 H_2O$  (0.72 mg, 2.90  $\mu$ mol) and sodium ascorbate (1.15 mg, 5.8  $\mu$ mol) were added. The reaction mixture was heated under microwave irradiation for 90 min at 80° C. The reaction mixture was filtered through a pad of Celite® and the filtrate was concentrated under reduced pressure to give a yellow solid. The mixture was purified through chromatographic column (silica gel, gradient: from MeOH to ammonia solution 4 M in MeOH) to give derivative **5a** with 27 % of yield (11.5 mg). Mp: > 240 °C dec.  $^1H$  NMR (400 MHz,  $CD_3OD$ ):  $\delta$  7.89 (s, *H*-triazole, 12H), 6.42 (s, *ArH*, 6H), 4.71 (s,  $-OCH_2$ -triazole, 24H), 4.32 (t,  $J = 7.1$  Hz, triazole- $CH_2$ , 24H), 3.93-3.83 (overlapped, 36H), 3.63 (m,  $N-CH_2-CHOH$ , 24H), 2.97 (d,  $J = 10.3$  Hz,  $N-CH_2-CHOH$ , 12H), 2.77 (m,  $CH_2-N$ , 12H), 2.60 (m,  $N-CH_2-CHOH$ , 12H), 2.39 (m,  $-CH-CH_2OH$ , 12H), 2.28-2.17 (overlapped,  $Ar-CH_3$  and  $CH_2-N$ , 30H), 2.03 (m,  $CH_2$ , 12H), 1.83 (m,  $CH_2$ , 24H), 1.60 (m,  $CH_2$ , 12H), 1.44 -1.29 (overlapped to signal of grease,  $CH_2$ , 36H). 0.90 (m,  $CH_2$ , 12H) ppm;  $^{13}C\{^1H\}$  NMR (100 MHz,  $CD_3OD$ ):  $\delta$  155.5, 145.0, 130.9, 126.3, 125.5, 80.9, 77.4, 74.4, 66.8, 62.6, 60.5, 56.4, 51.3, 31.3, 29.0, 27.9, 27.4, 11.2 ppm; HRMS (MALDI)  $m/z$   $[M]^+$  calcd. for  $[C_{216}H_{336}N_{48}O_{48}]^+$ : 4395.5286; found: 4395.5269;  $[\alpha]_{25}^D$  (c: 1.9 mg/mL) =  $-25.74^\circ$ .

**5b:** Derivative **5d** (10.9 mg, 8.60  $\mu\text{mol}$ ) and derivative **7** (30.0 mg, 0.10 mmol) were dissolved in a mixture of THF/H<sub>2</sub>O (1.00 mL, 2:1 v/v) in an ACE pressure tube and Cu<sub>2</sub>SO<sub>4</sub> · 5 H<sub>2</sub>O (0.64 mg, 2.60  $\mu\text{mol}$ ) and sodium ascorbate (1.00 mg, 5.20  $\mu\text{mol}$ ) were added. The reaction mixture was heated under microwave irradiation for 90 min at 80° C. The reaction mixture was filtered through a pad of Celite® and the filtrate was concentrated under reduced pressure to give a yellow solid. The mixture was purified through chromatographic column (silica gel, gradient: from MeOH to ammonia solution 4 M in MeOH) to give derivative **5b** with 31 % of yield (12.7 mg). Mp: > 210 °C dec. <sup>1</sup>H NMR (600 MHz, CD<sub>3</sub>OD):  $\delta$  7.92 (s, *H*-triazole, 12H), 6.46 (s, Ar*H*, 6H), 4.72 (overlapped to signal of H<sub>2</sub>O, 24H), 4.52 (overlapped to signal of H<sub>2</sub>O, 24H), 3.90-3.84 (overlapped, 60H), 3.64-3.49 (overlapped, CH<sub>2</sub>, 96H), 3.01-2.94 (overlapped, 24H), 2.66 (m, 12H), 2.46-2.42 (overlapped, 24H), 2.24 (s, Ar-CH<sub>3</sub>, 18H) ppm; <sup>13</sup>C{<sup>1</sup>H}NMR (150 MHz, CD<sub>3</sub>OD):  $\delta$  155.6, 145.0, 130.9, 126.4, 126.2, 80.7, 77.4, 74.2, 71.3, 71.2, 70.7, 70.4, 66.8, 62.1, 61.1, 55.1, 51.4, 30.8, 11.3 ppm; HRMS (MALDI) *m/z* [M+Na]<sup>+</sup> calcd. for [C<sub>216</sub>H<sub>336</sub>N<sub>48</sub>NaO<sub>72</sub>]<sup>+</sup>: 4779.4065; found: 4779.3962; [ $\alpha$ ]<sub>25</sub><sup>D</sup> (c: 1.1 mg/mL) = -10.74°.

**Copies of 1D, 2D NMR and HR mass spectra**

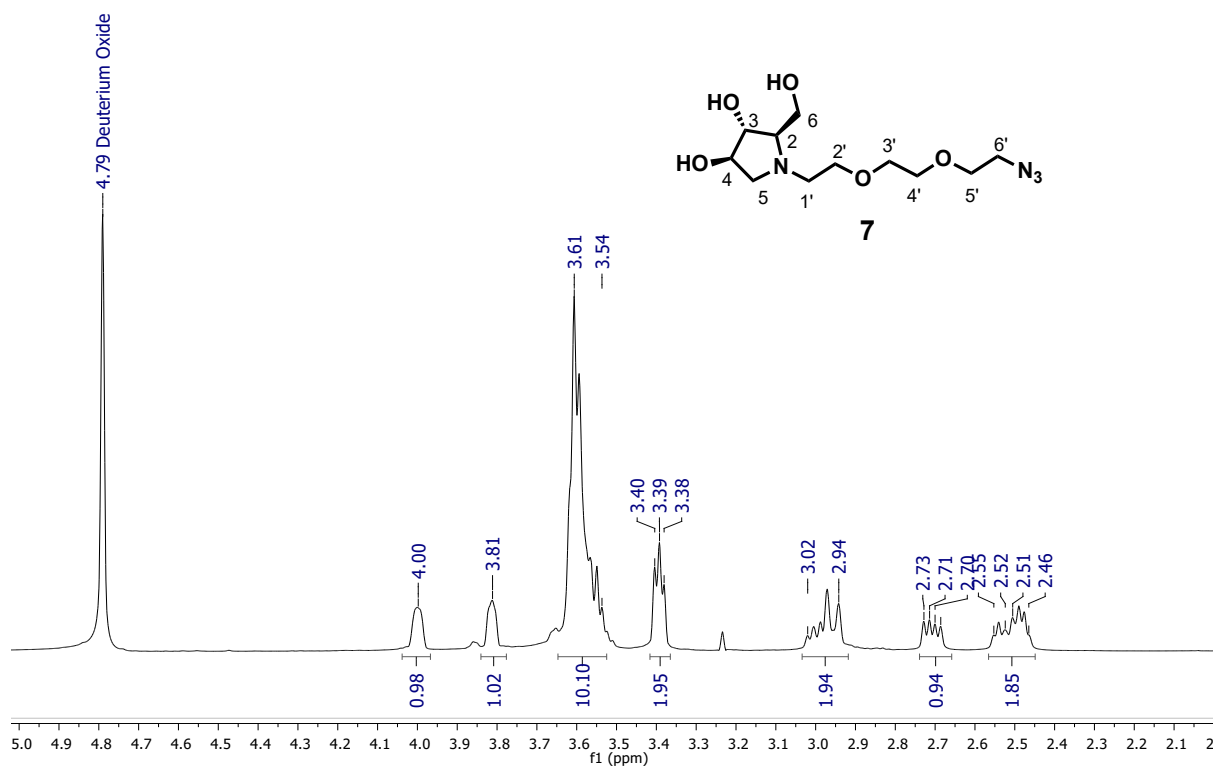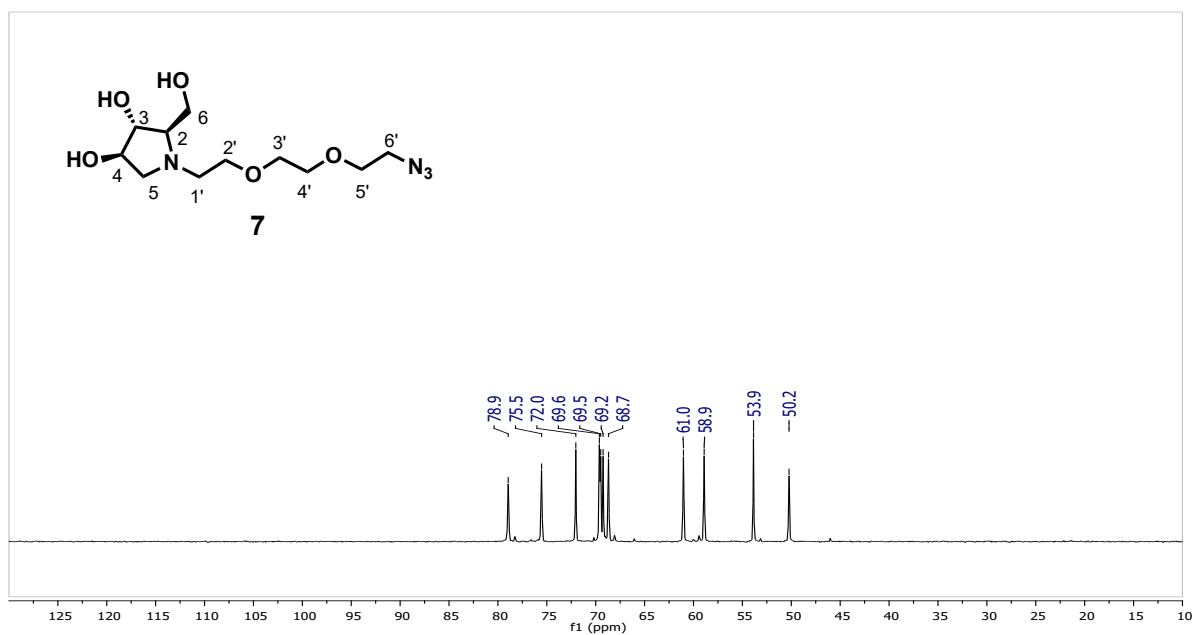



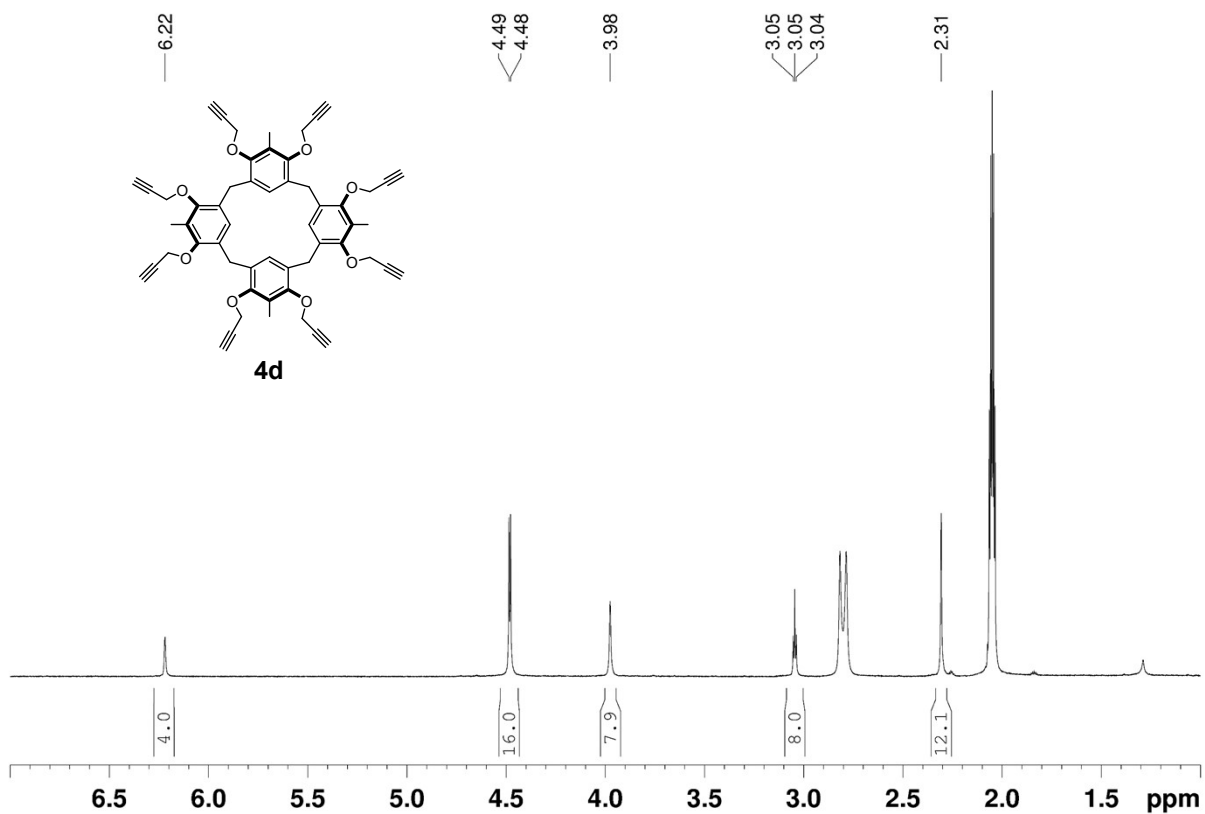

**Figure S3:**  $^1\text{H}$  NMR spectrum of compound **4d** (300 MHz, Acetone- $d_6$ ).

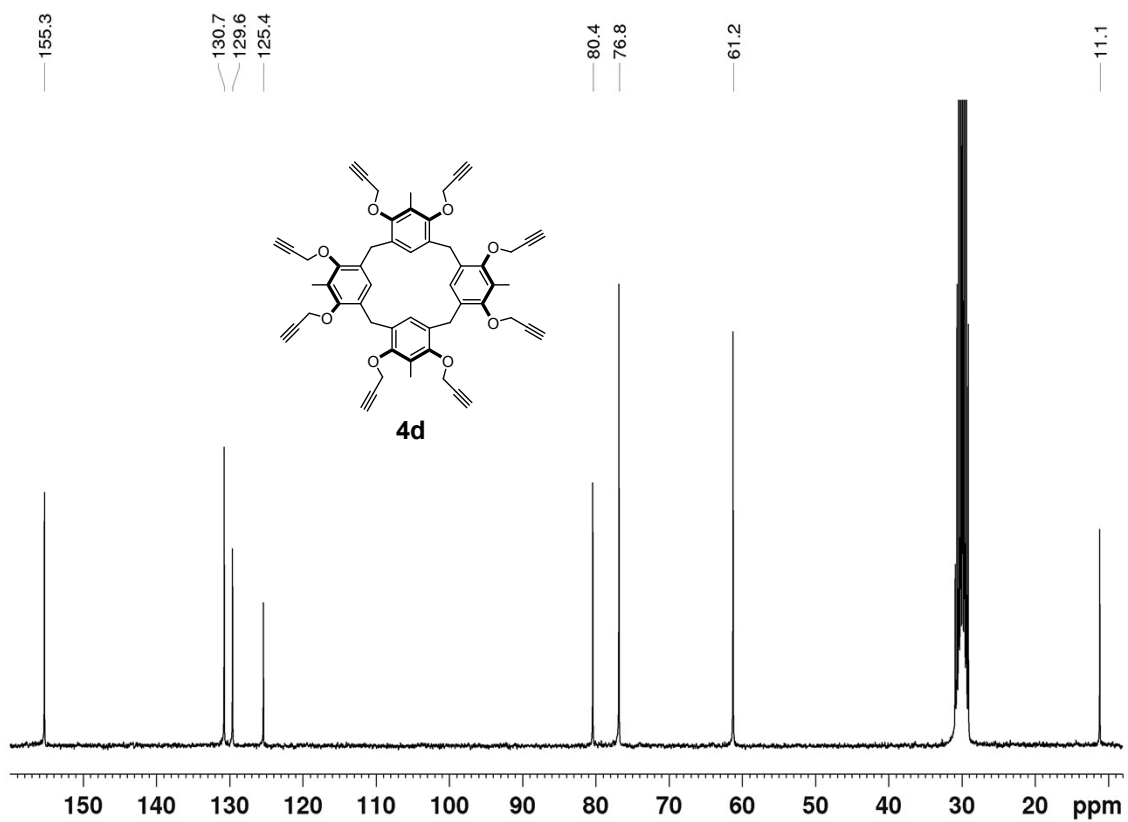

**Figure S4:**  $^{13}\text{C}$  NMR spectrum of compound **4d** (75 MHz, Acetone- $d_6$ ).

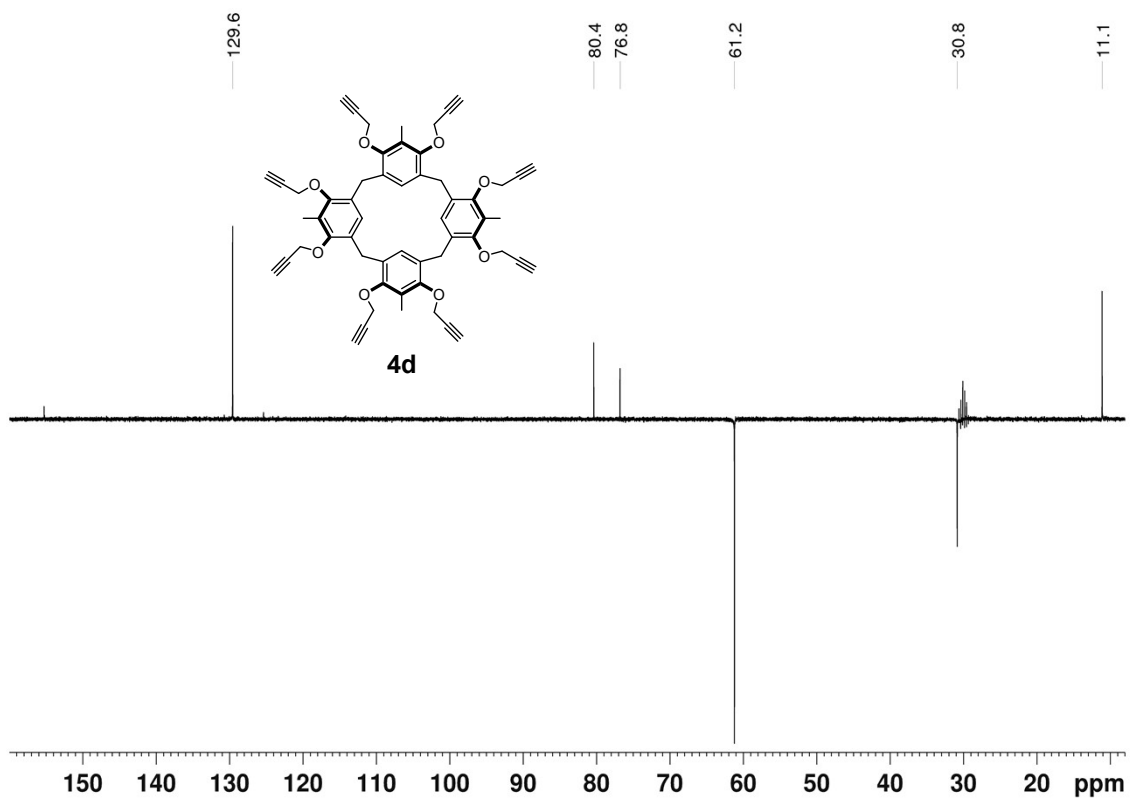

**Figure S5:** Dept 135 spectrum of compound **4d** (75 MHz, Acetone- $d_6$ ).

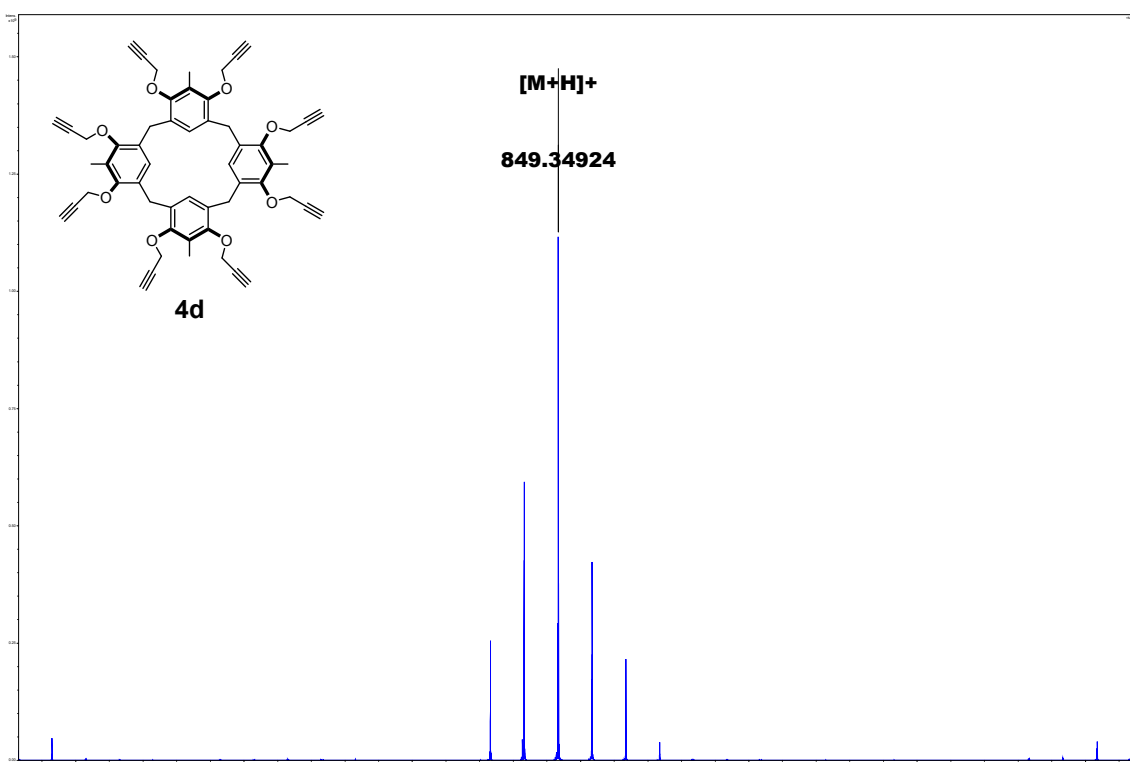

**Figure S6:** Significant portion of the MALDI FT-ICR mass spectrum of **4d**  $[M+H]^+$ , showing the isotopic envelop.

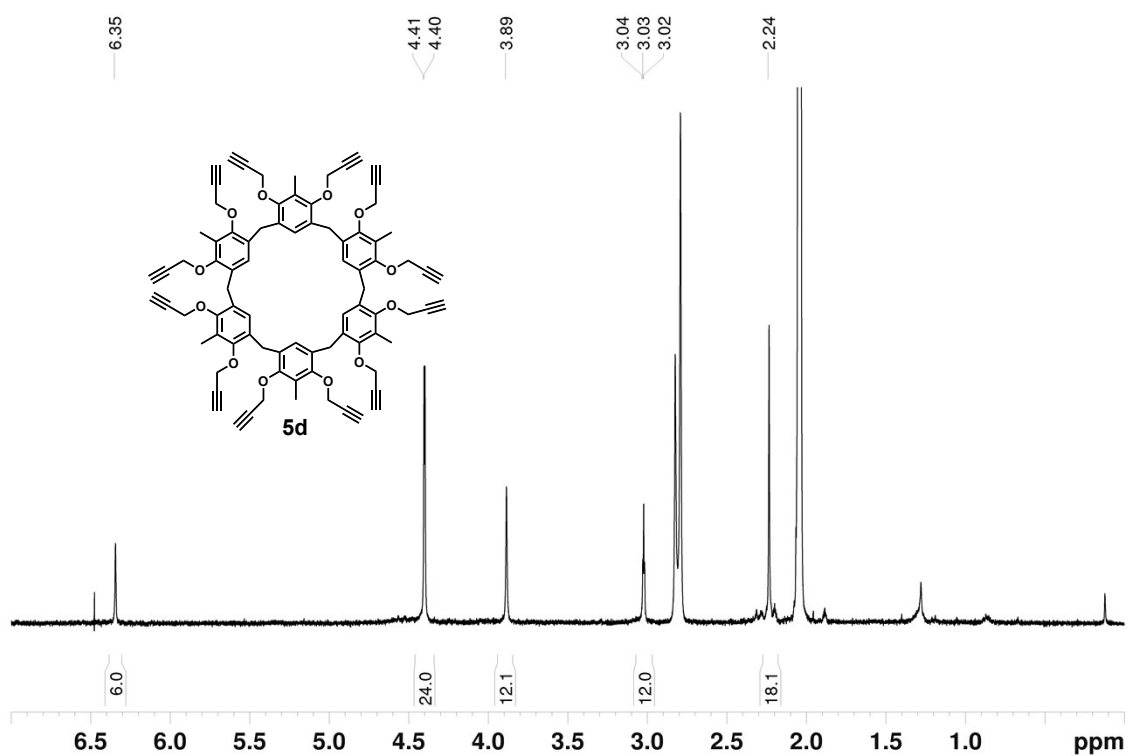

**Figure S7:** <sup>1</sup>H NMR spectrum of compound **5d** (300 MHz, Acetone-*d*<sub>6</sub>).

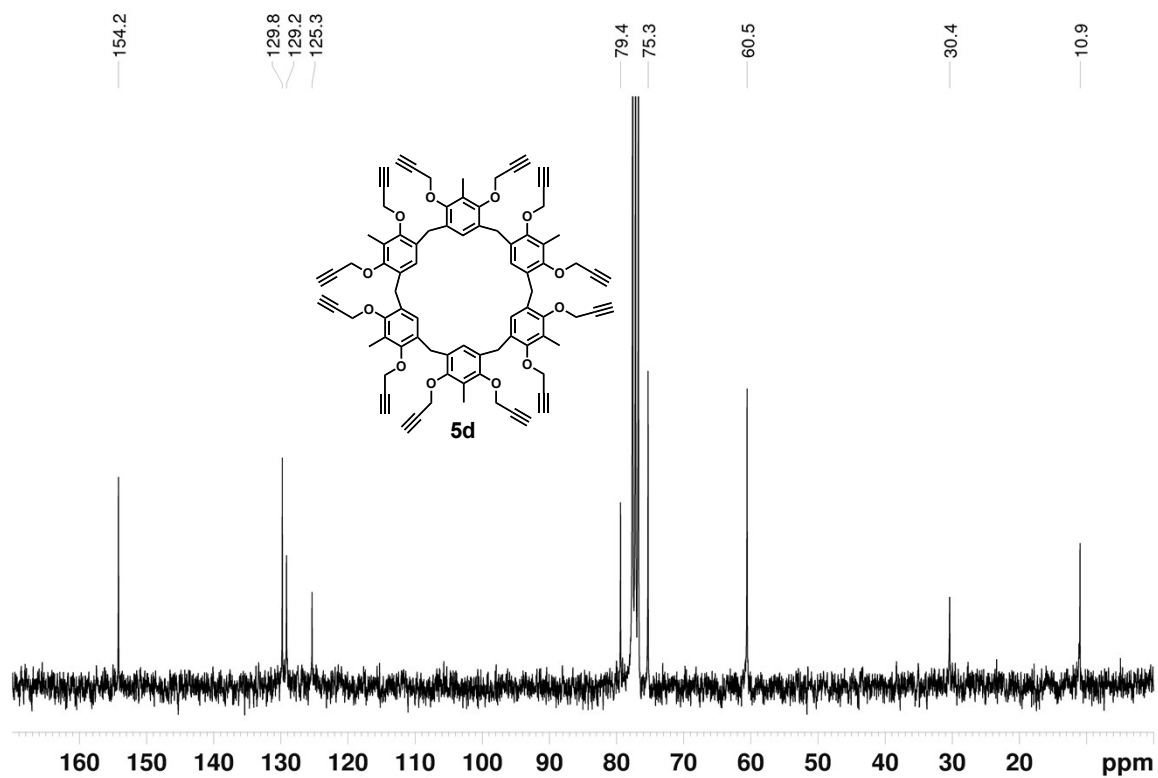

**Figure S8:** <sup>13</sup>C NMR spectrum of compound **5d** (100 MHz, Acetone-*d*<sub>6</sub>).

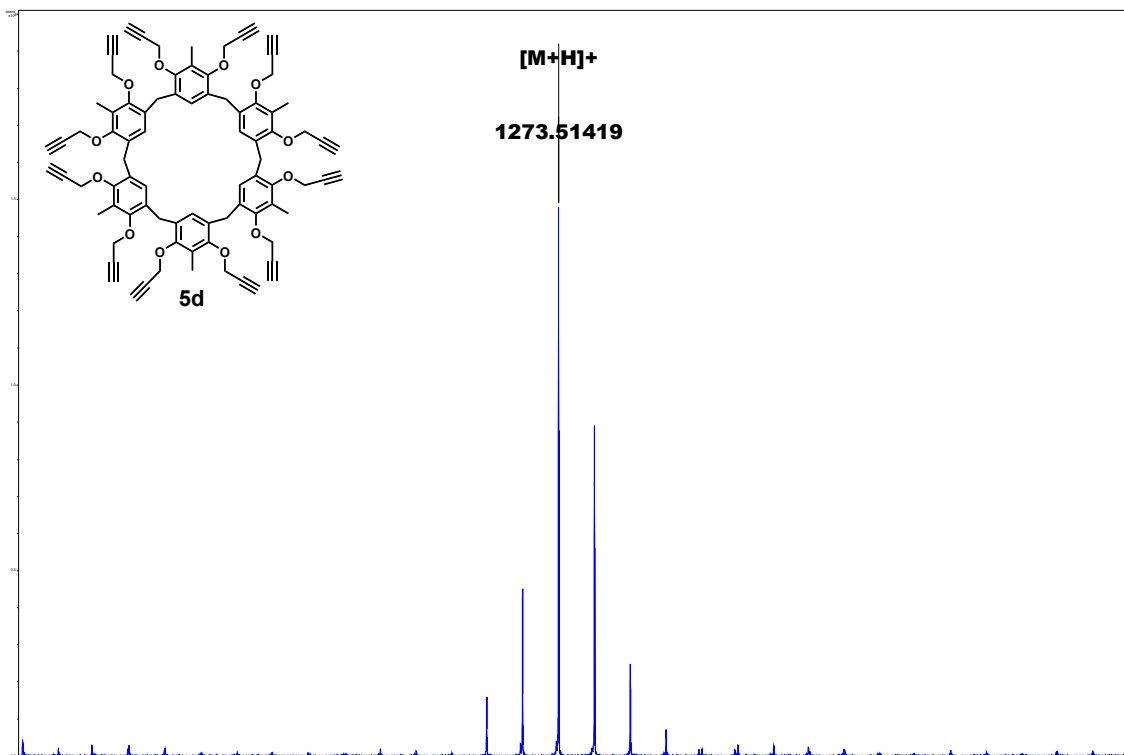

**Figure S9:** Significant portion of the MALDI FT-ICR mass spectrum of **5d**  $[M+H]^+$ , showing the isotopic envelop.

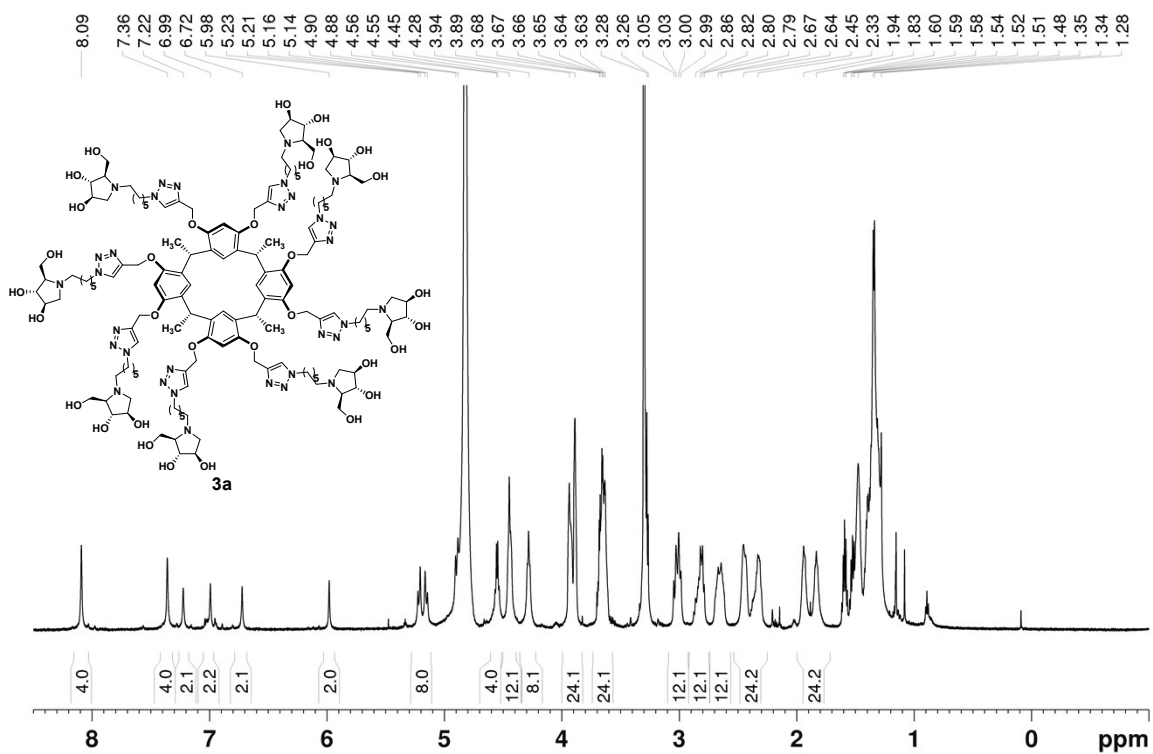

**Figure S10: <sup>1</sup>H NMR spectrum of 3a (CD<sub>3</sub>OD, 600 MHz).**

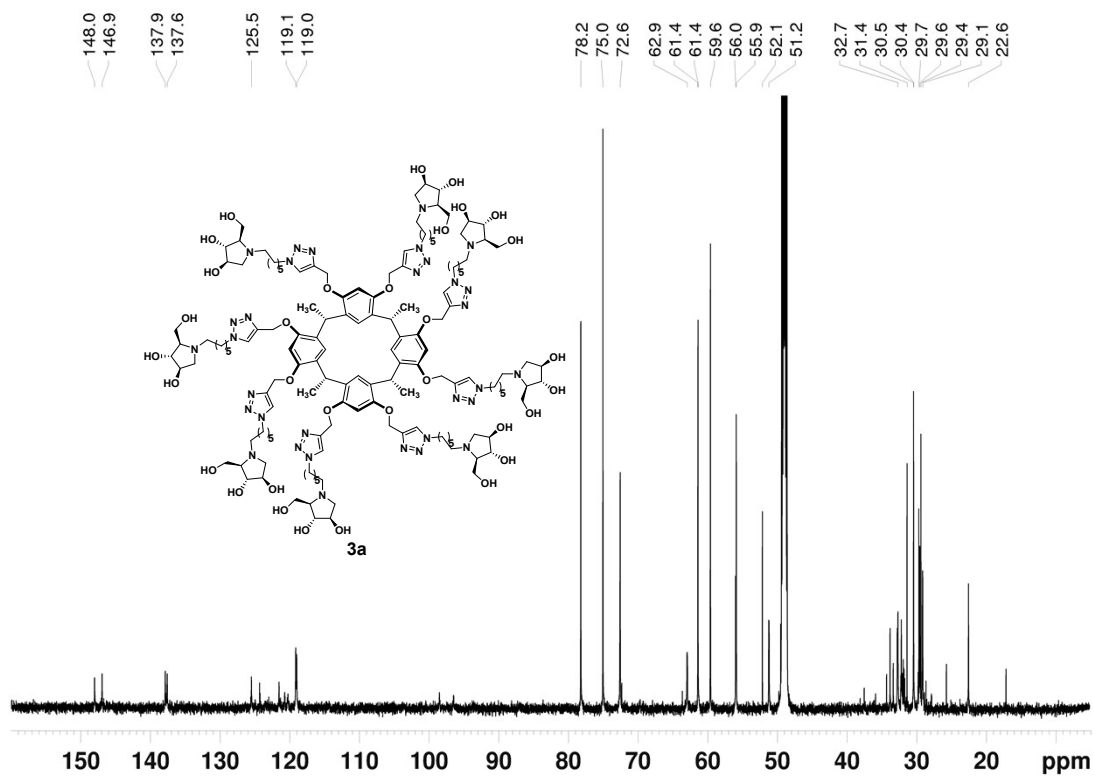

**Figure S11: <sup>13</sup>C NMR spectrum of 3a (CD<sub>3</sub>OD, 150 MHz).**

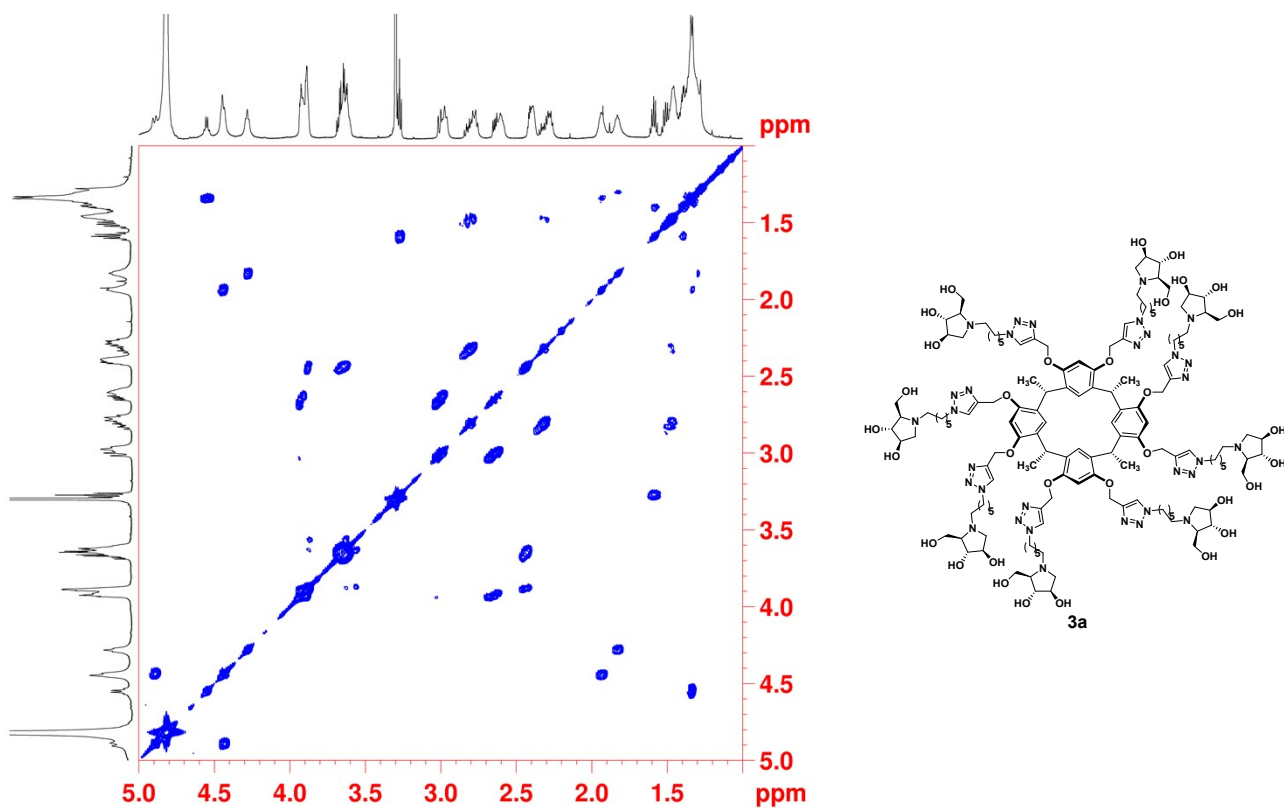

Figure S12: Significant portion of 2D COSY spectrum of **3a** (CD<sub>3</sub>OD, 600 MHz).

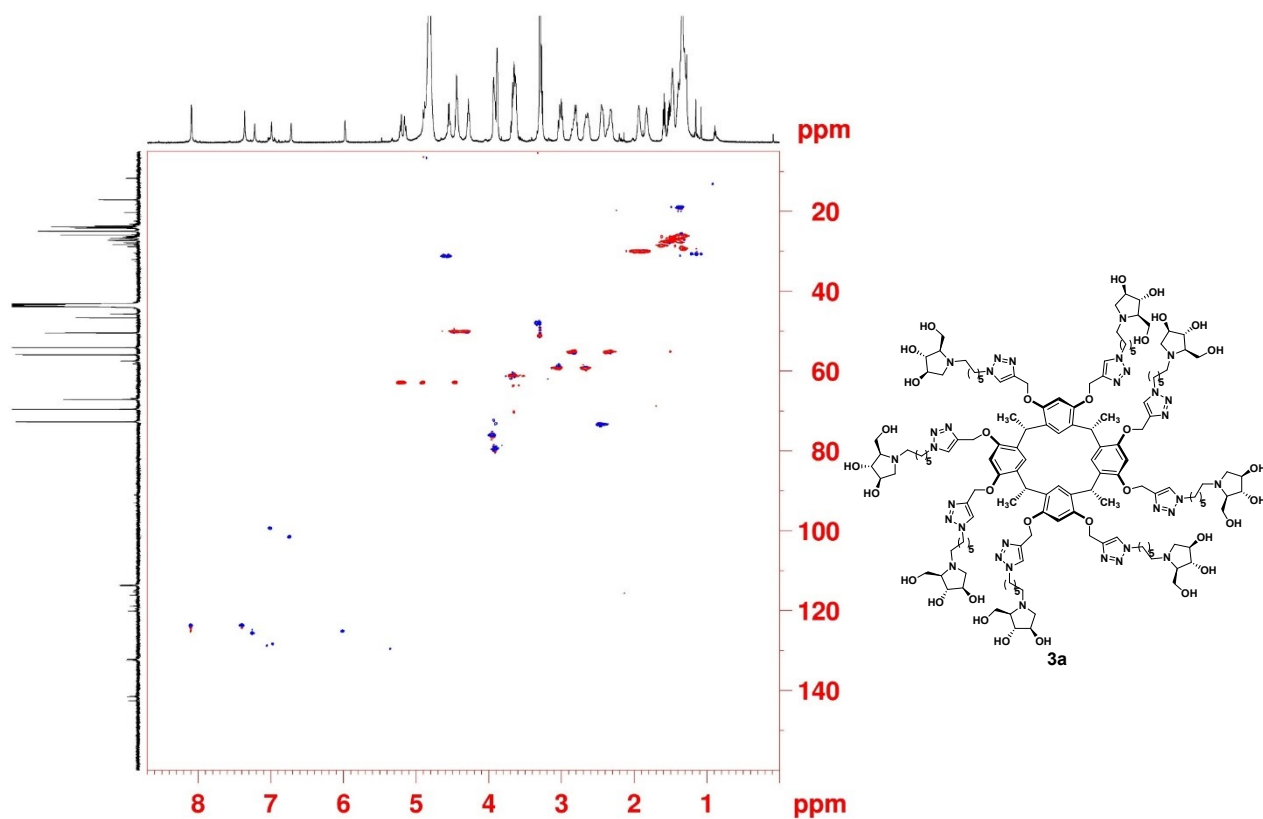

Figure S13: 2D HSQC spectrum of **3a** (CD<sub>3</sub>OD, 600 MHz).

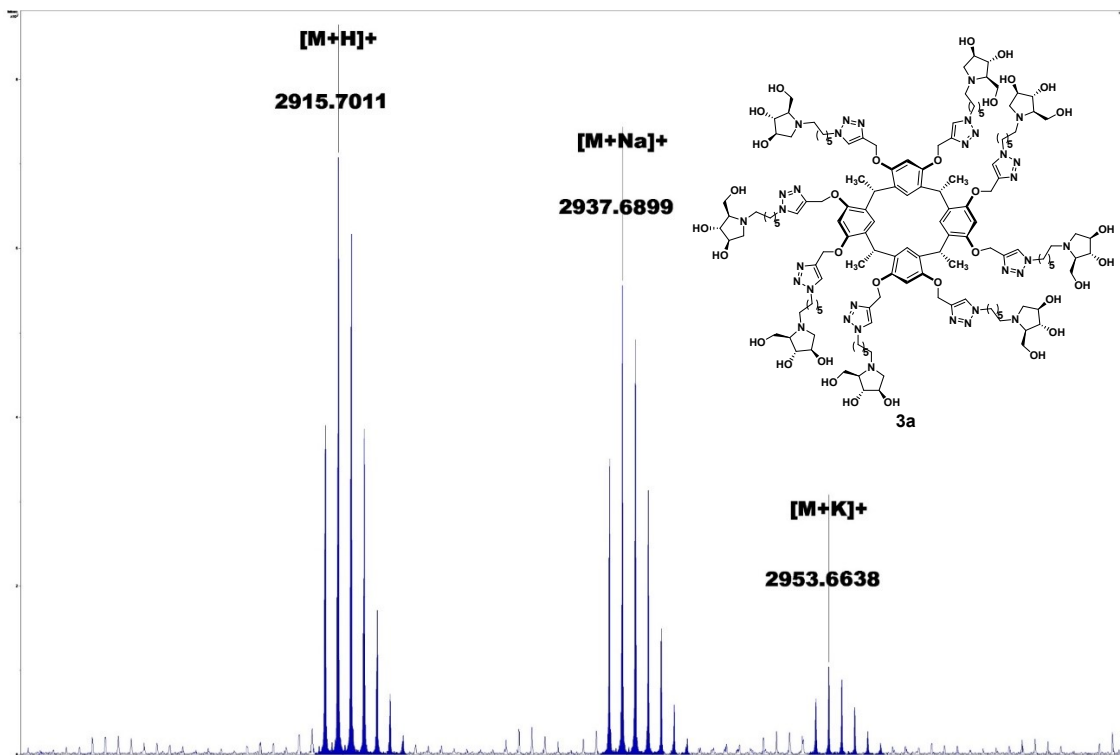

**Figure S14:** Significant portion of the MALDI FT-ICR mass spectrum of **3a**, showing the isotopic envelop of [M+H]<sup>+</sup>, [M+Na]<sup>+</sup> and [M+K]<sup>+</sup>.

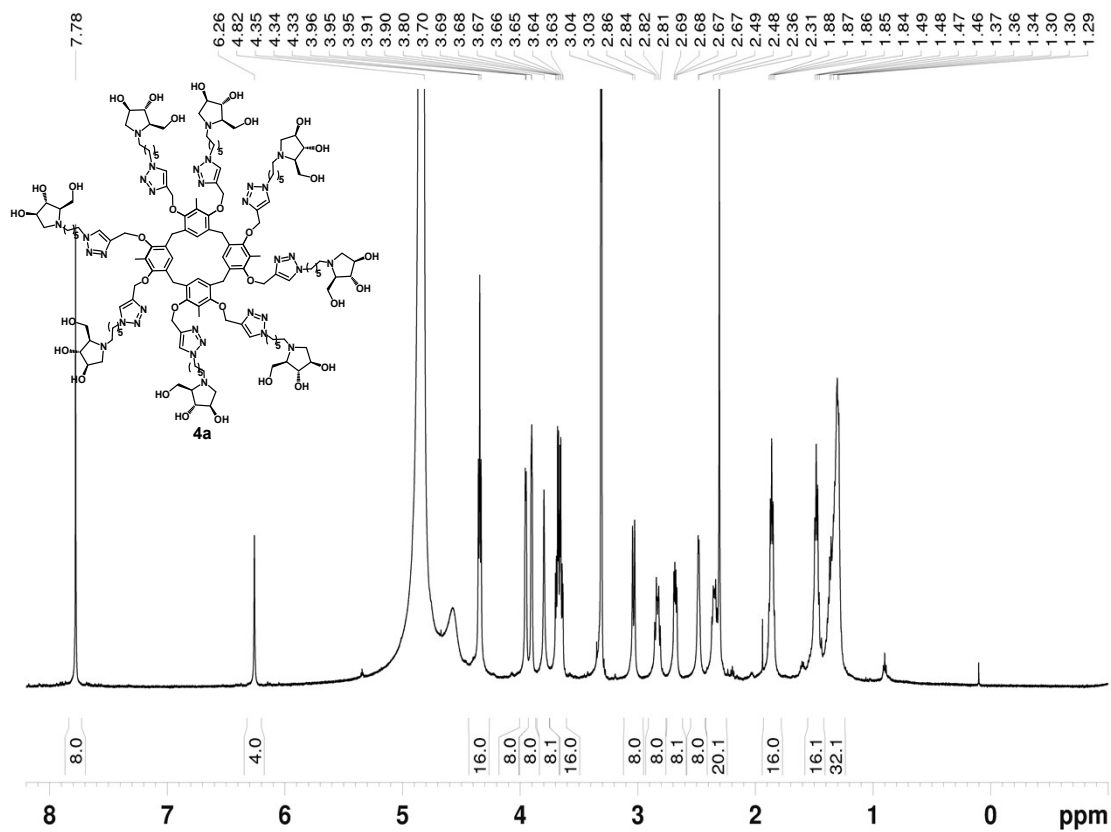

Figure S15: <sup>1</sup>H NMR spectrum of **4a** (CD<sub>3</sub>OD, 600 MHz).

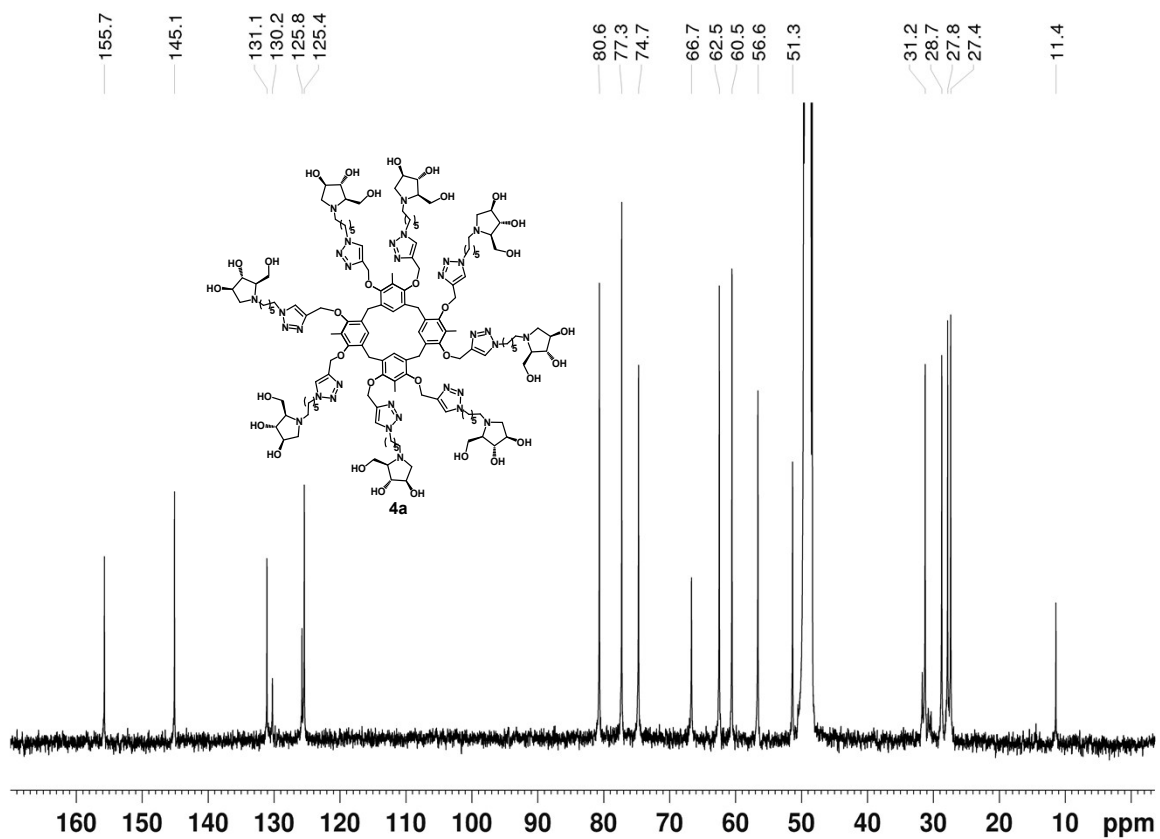

Figure S16: <sup>13</sup>C NMR spectrum of **4a** (CD<sub>3</sub>OD, 100 MHz).



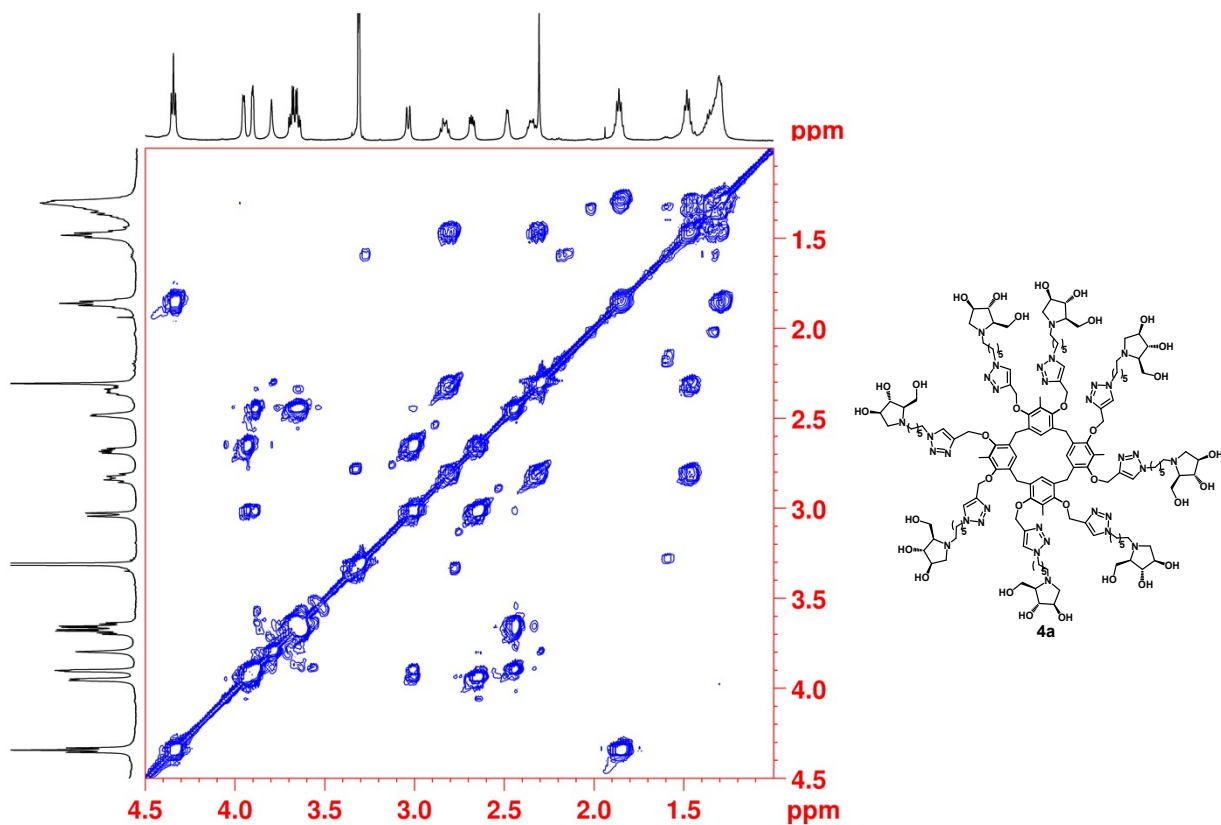

Figure S17: Significant portion of 2D COSY spectrum of **4a** ( $\text{CD}_3\text{OD}$ , 600 MHz).

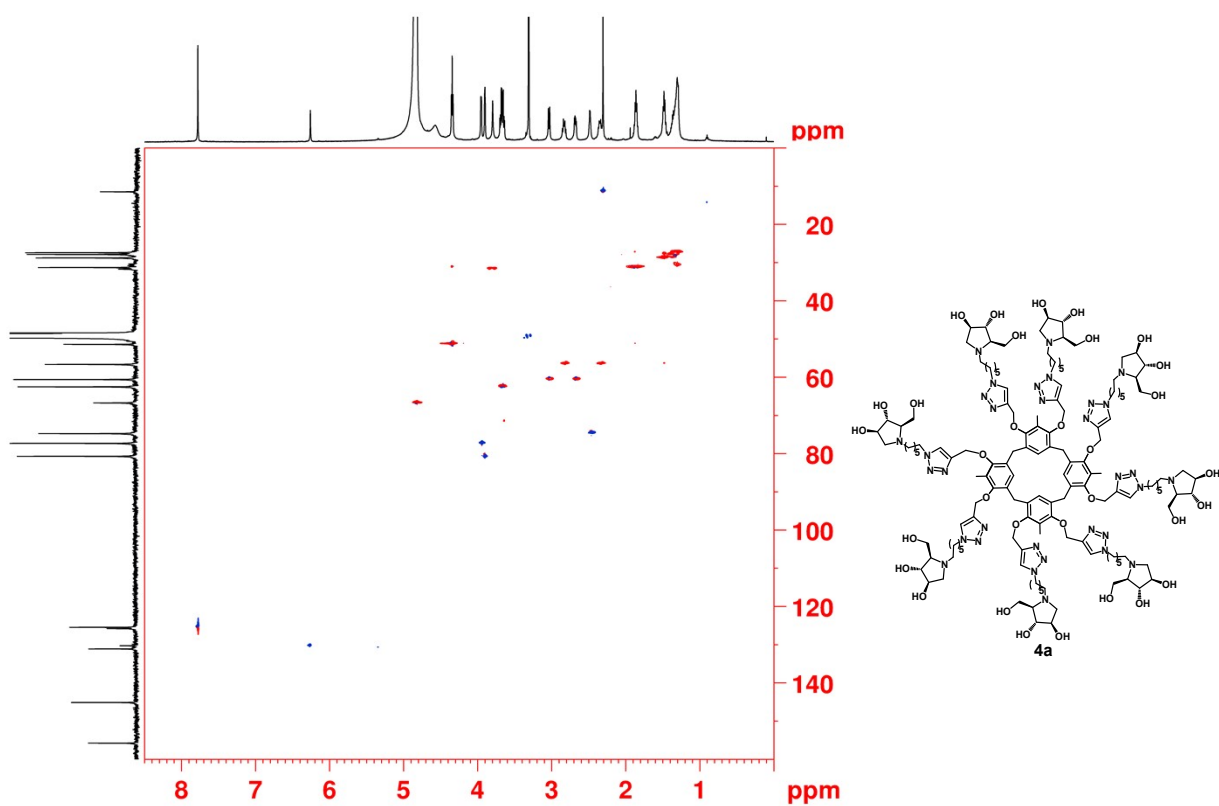

Figure S18: 2D HSQC spectrum of **4a** ( $\text{CD}_3\text{OD}$ , 600 MHz).

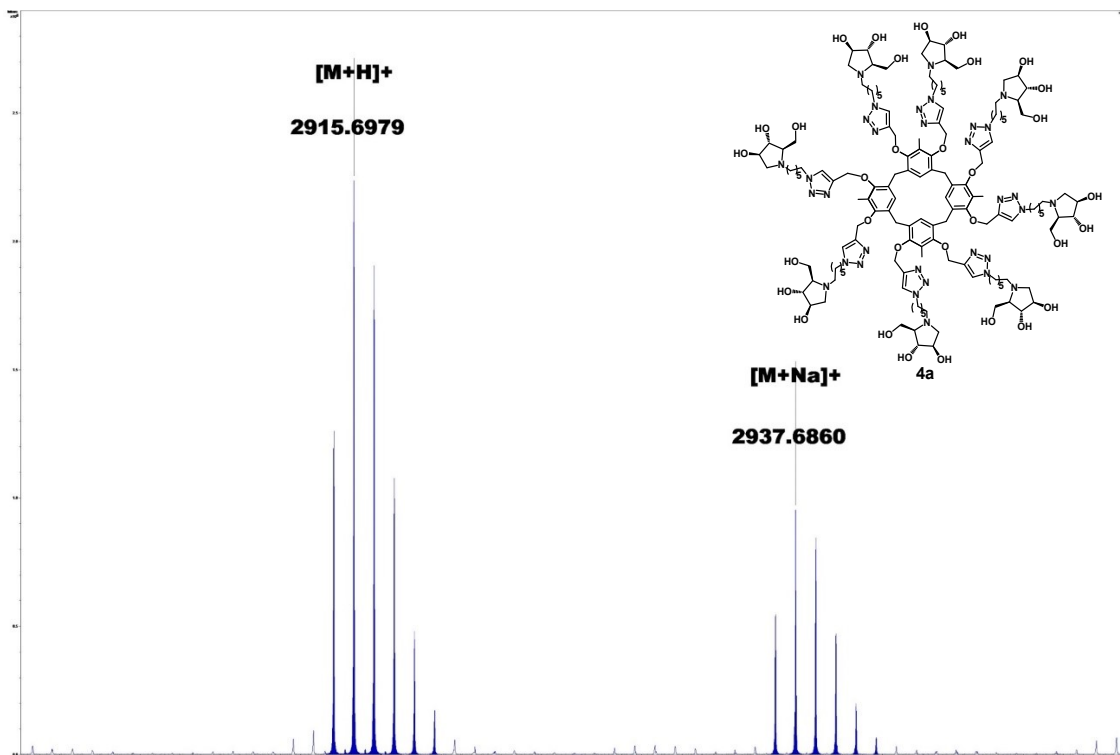

**Figure S19:** Significant portion of the MALDI FT-ICR mass spectrum of **4a**, showing the isotopic envelop of  $[M+H]^+$  and  $[M+Na]^+$ .

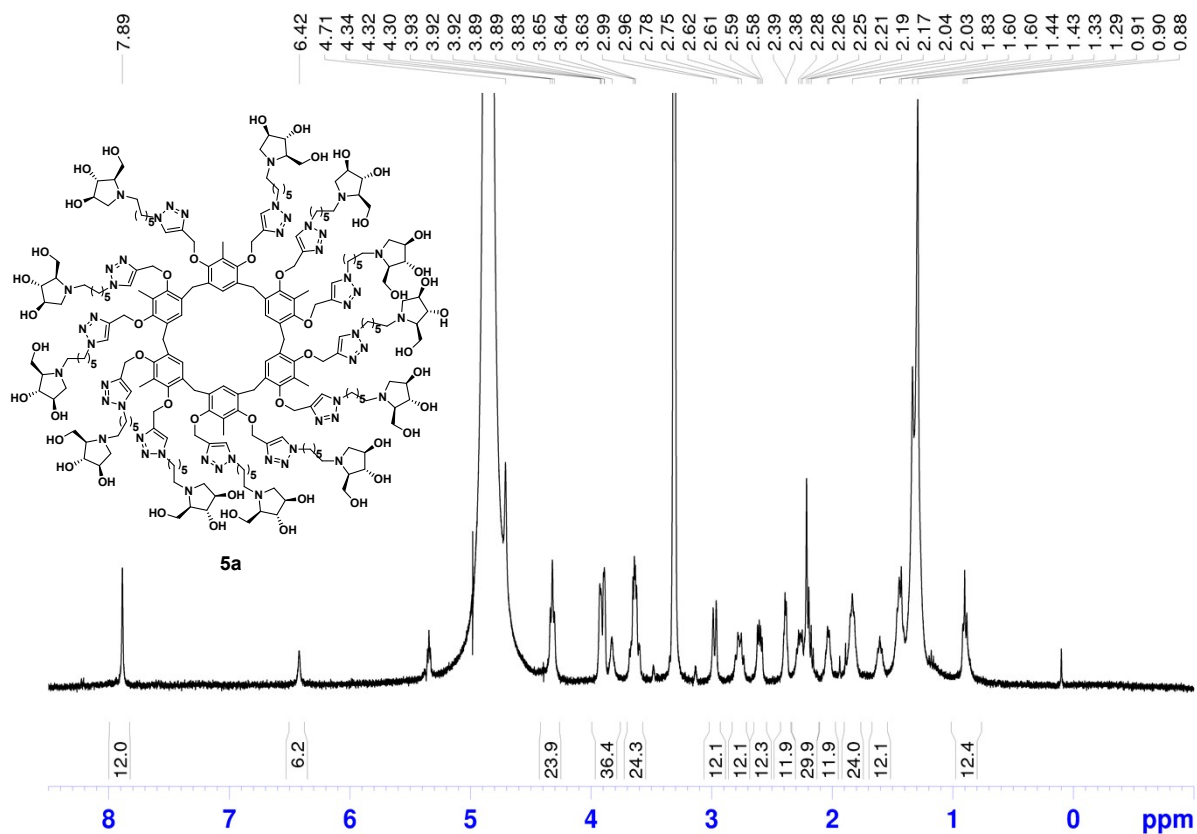

Figure S20:  $^1\text{H}$  NMR spectrum of 5a ( $\text{CD}_3\text{OD}$ , 400 MHz).

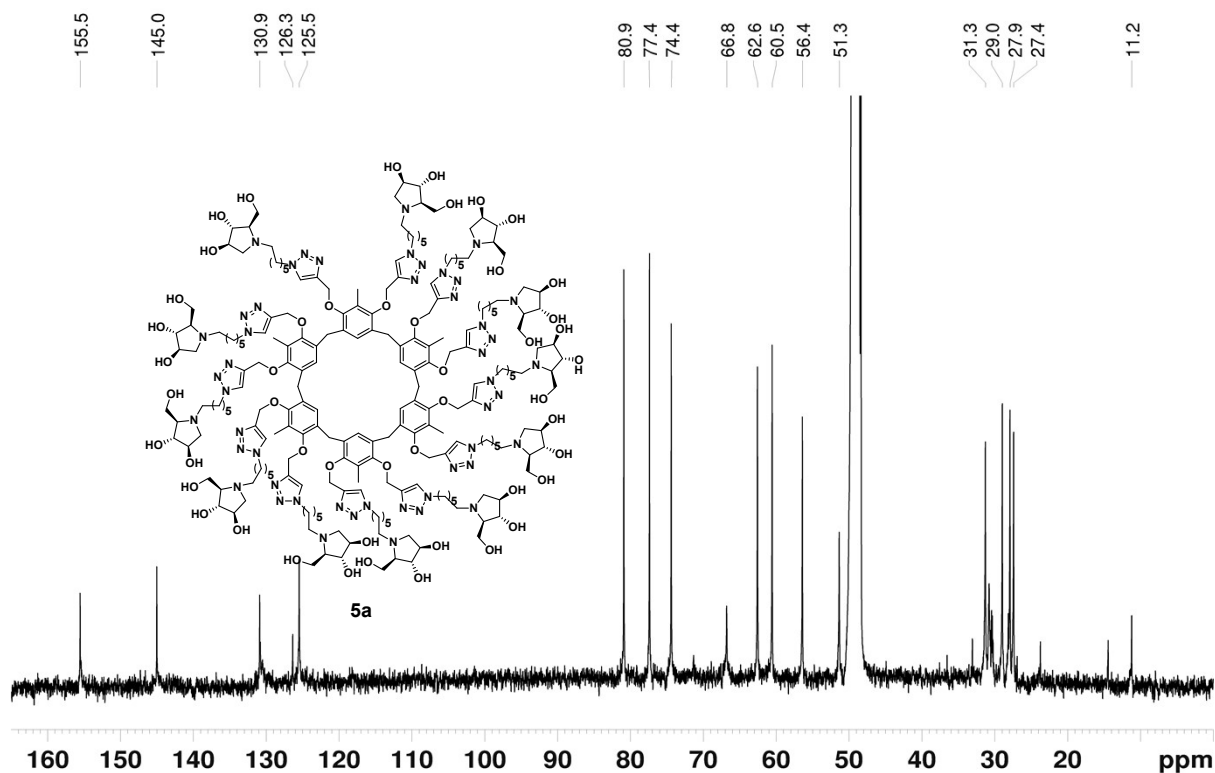

Figure S21:  $^{13}\text{C}$  NMR spectrum of 5a ( $\text{CD}_3\text{OD}$ , 100 MHz).

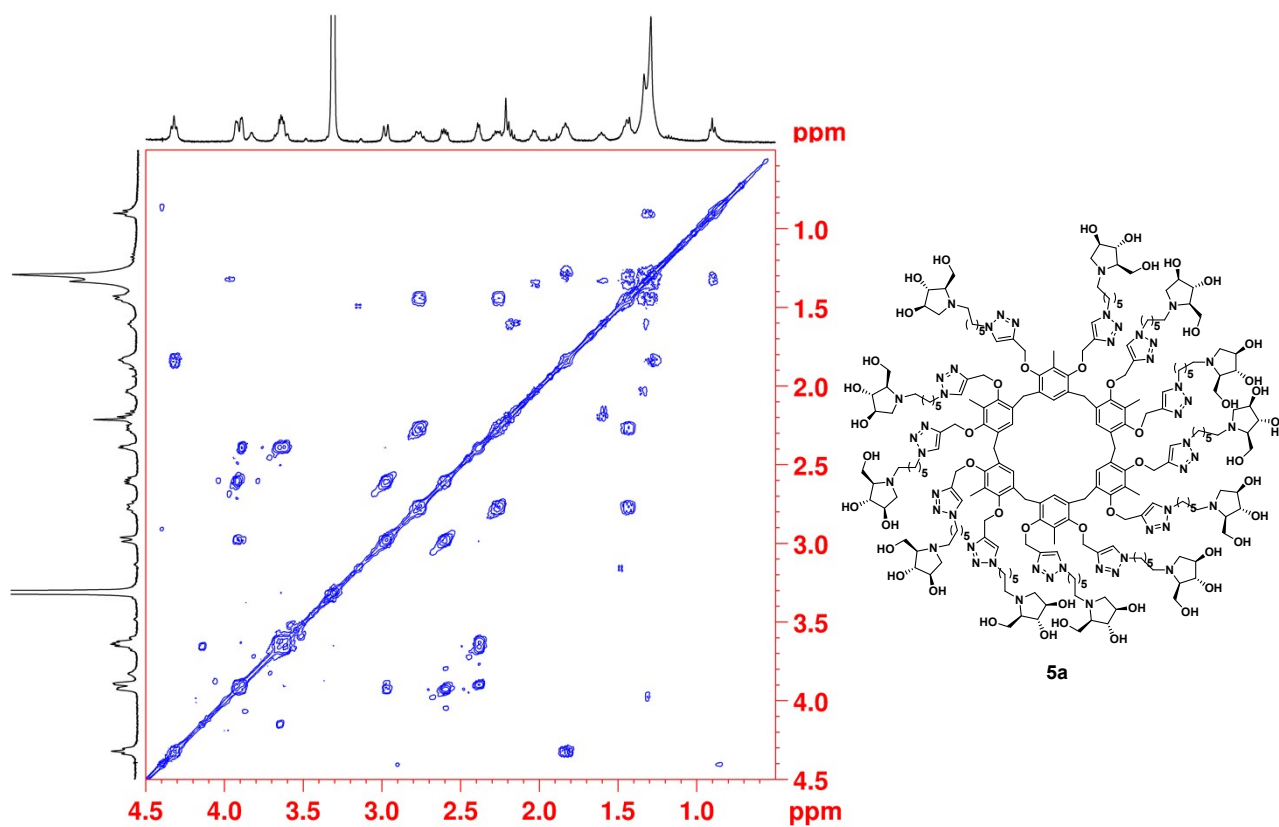

Figure S22: Significant portion of 2D COSY spectrum of **5a** (CD<sub>3</sub>OD, 600 MHz).

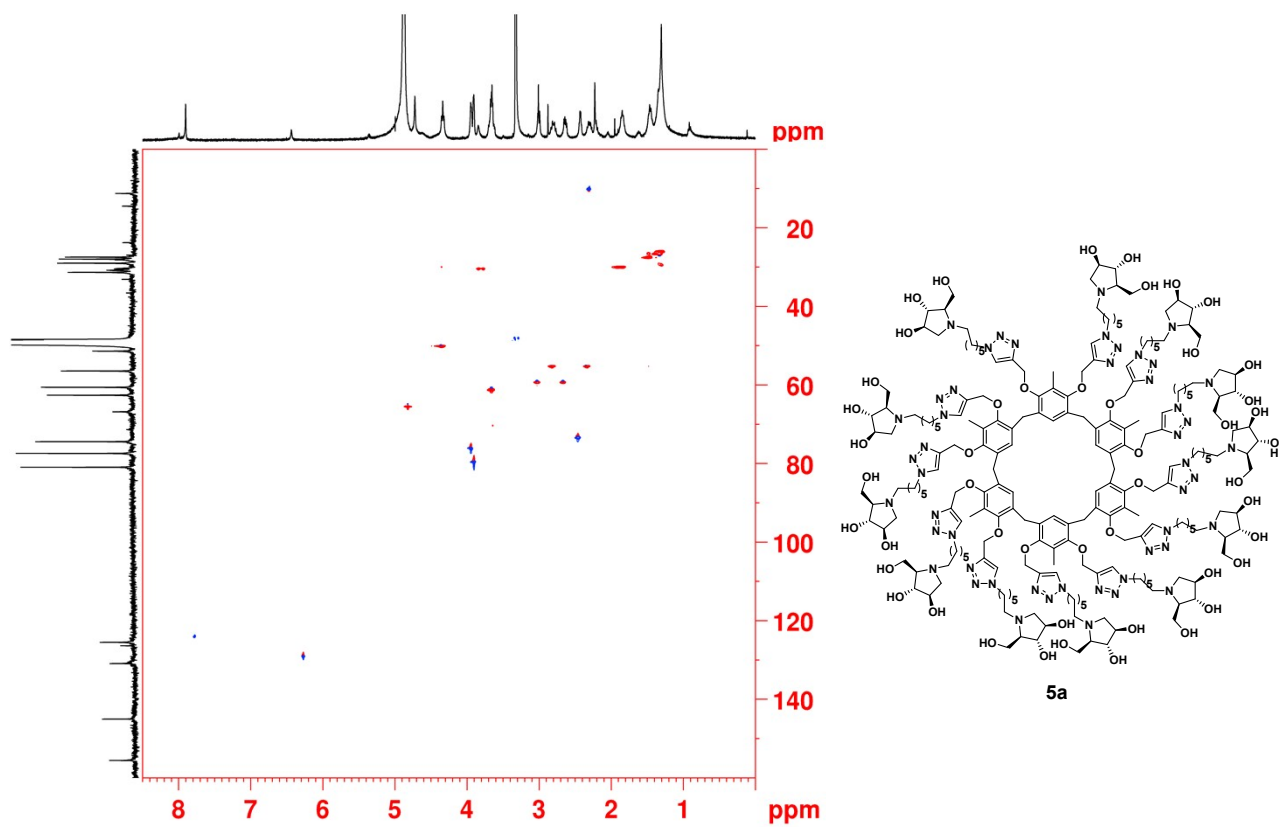

Figure S23: 2D HSQC spectrum of **5a** (CD<sub>3</sub>OD, 600 MHz).

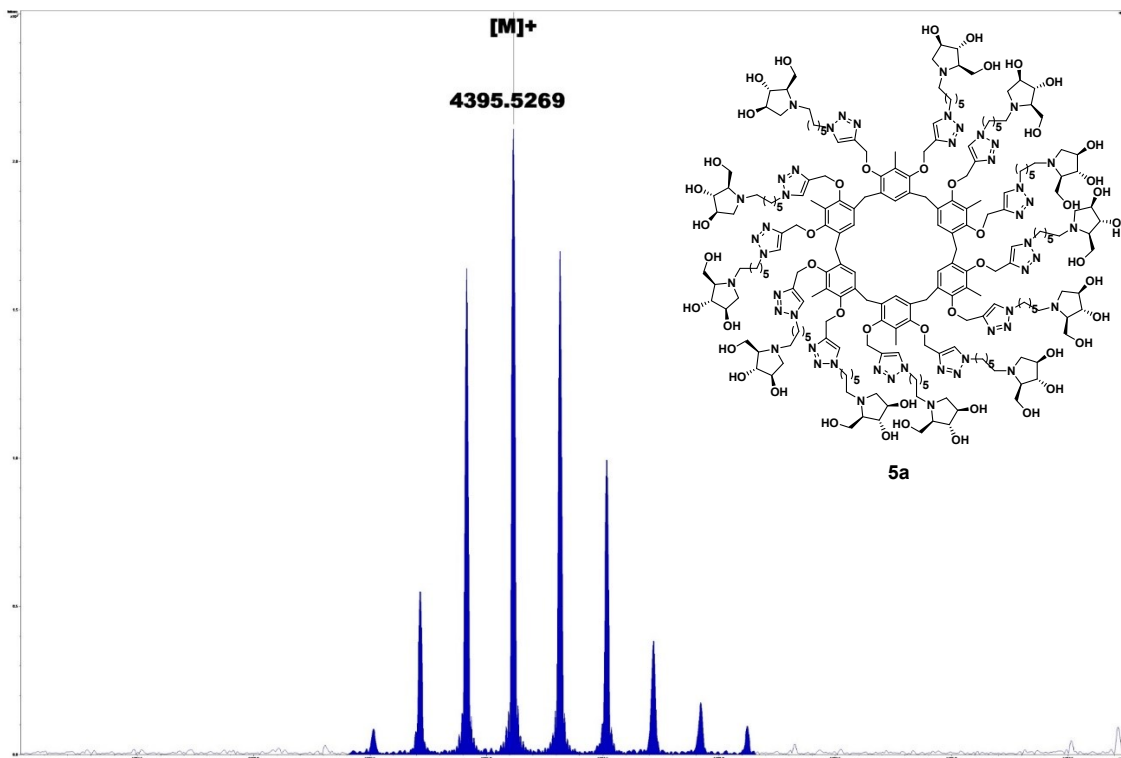

**Figure S24:** Significant portion of the MALDI FT-ICR mass spectrum of **5a** [M]<sup>+</sup>, showing the isotopic envelop.

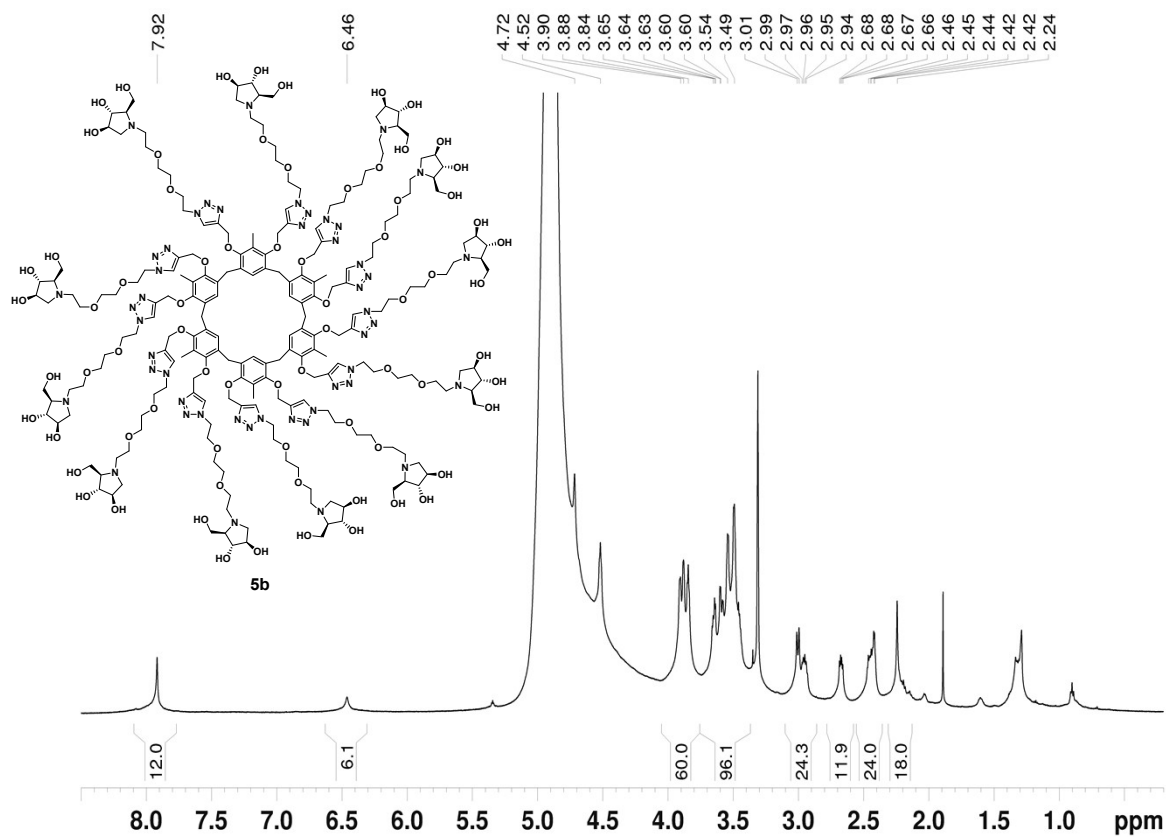

**Figure S25:**  $^1\text{H}$  NMR spectrum of **5b** ( $\text{CD}_3\text{OD}$ , 600 MHz).

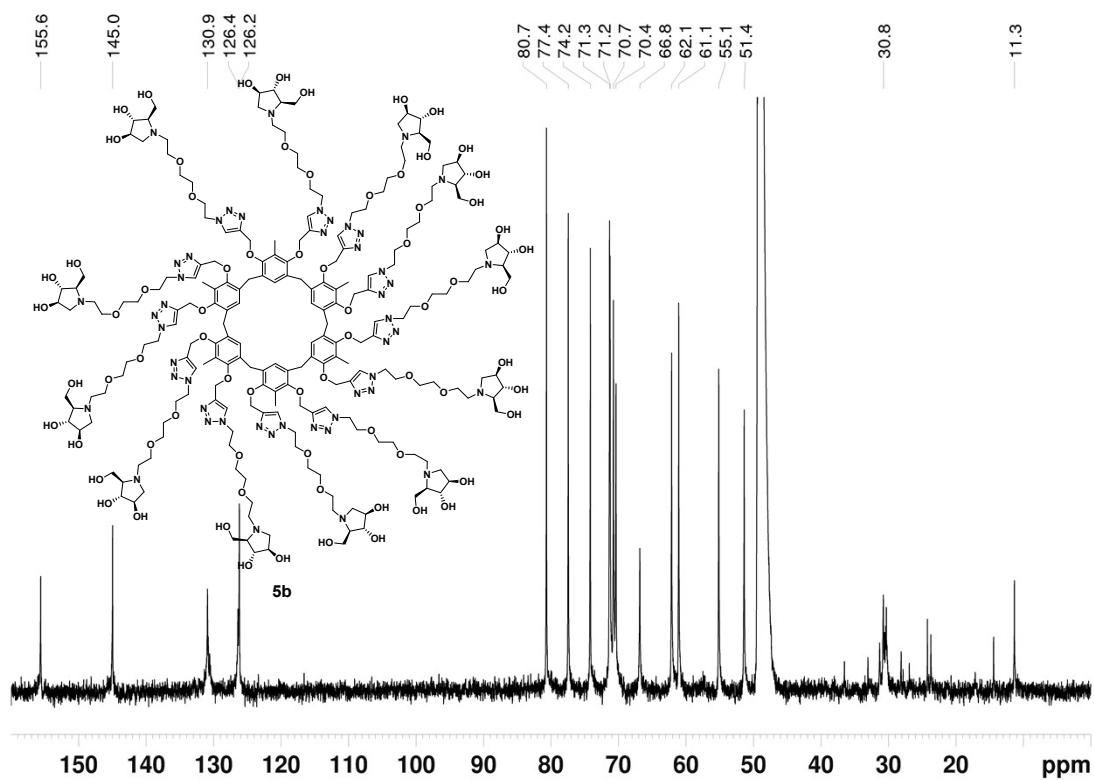

**Figure S26:**  $^{13}\text{C}$  NMR spectrum of **5b** ( $\text{CD}_3\text{OD}$ , 150 MHz).

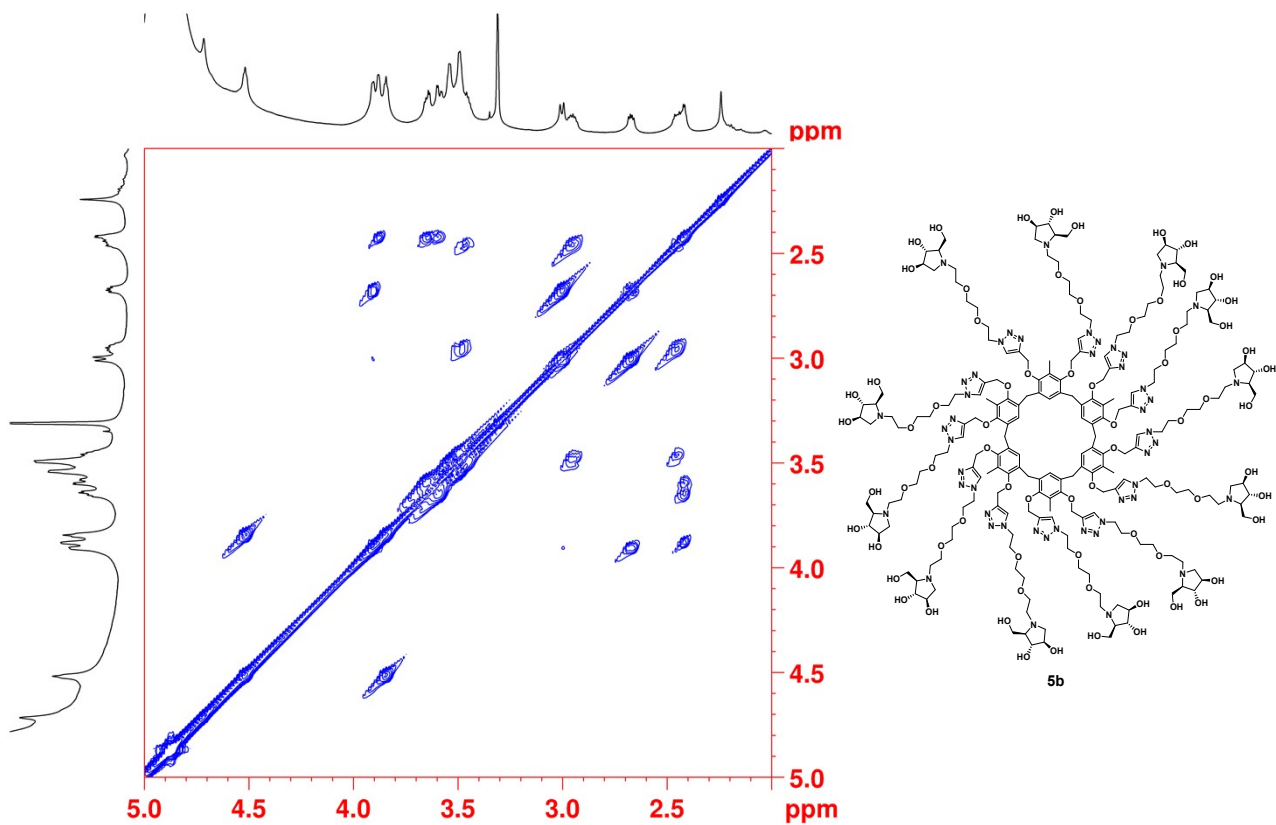

Figure S27: Significant portion of 2D COSY spectrum of **5b** ( $\text{CD}_3\text{OD}$ , 600 MHz).

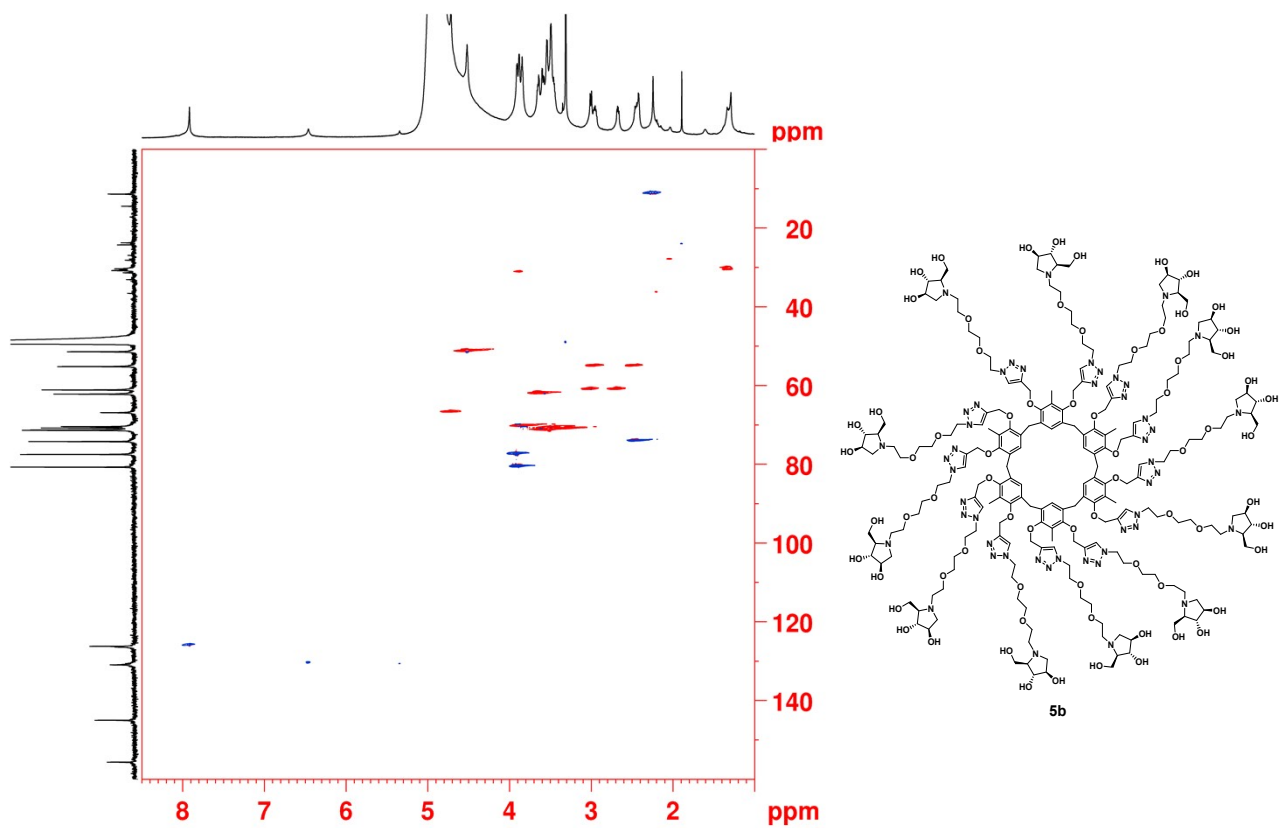

Figure S28: 2D HSQC spectrum of **5b** ( $\text{CD}_3\text{OD}$ , 600 MHz).

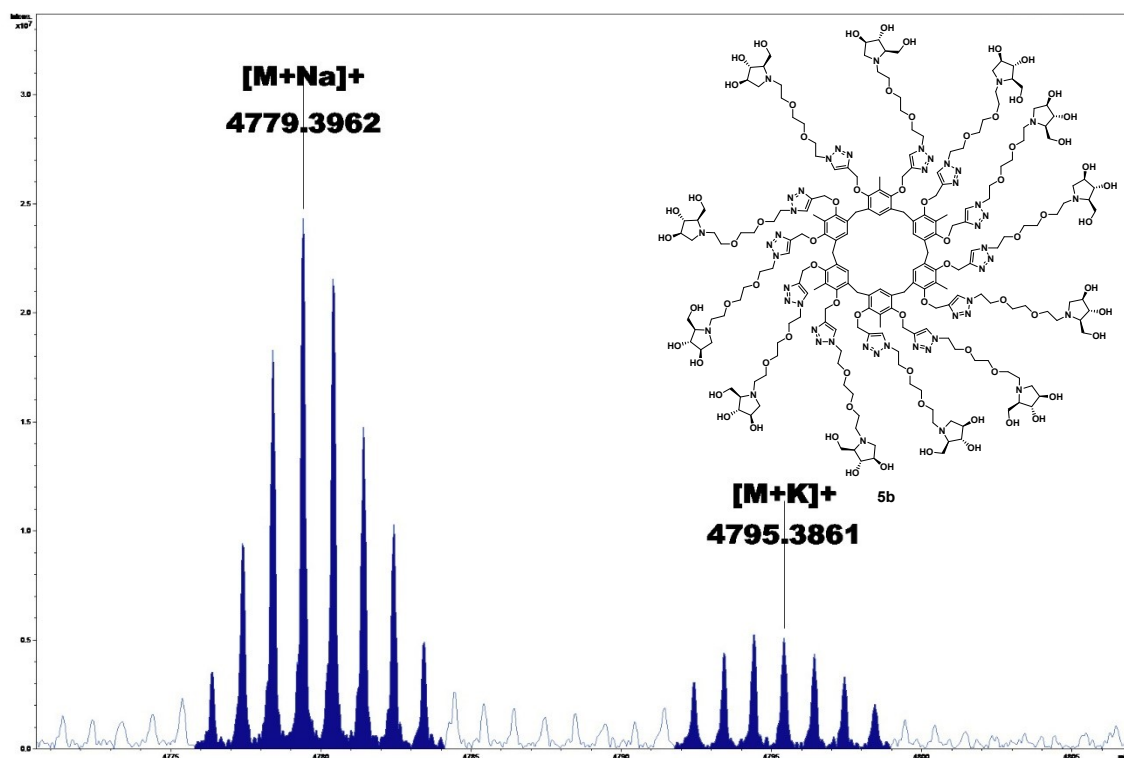

**Figure S29:** Significant portion of the MALDI FT-ICR mass spectrum of **5b**, showing the isotopic envelop of  $[M+Na]^+$  and  $[M+K]^+$ .



## In Silico Studies

VINA docking and molecular dynamics calculations were performed on Intel Xeon GOLD 5118 processors while Autodock calculation was carried out on an Intel Core i7-6700HQ. JB $\alpha$ -man high-resolution X-ray structure (Protein Data Bank, PDB entry 6B9O)<sup>11</sup> was used as the starting structure for molecular dynamics simulation and docking studies. The multivalent derivatives **3a**, **4a**, **5a** and **5b** were optimized through a molecular dynamics simulation performed with Yasara Software<sup>12</sup> package in a box of water (100 x 100 x 100 Å) and AMBER force field for 10 ns. The protein-ligand complexes were prepared for the molecular dynamics simulations on the dimeric protein structure (LH)<sub>2</sub> using Yasara Software package. Each complex was placed in a cubic box with periodic boundaries and water molecules, NaCl was added at the physiological conditions. The systems were simulated in NVT ensemble at 298 K for 10 ns. The systems were then energy minimized using first a steepest descent minimization and then by a simulated annealing minimization until convergence (<0.01 kcal/mol Å).

VINA calculation was performed with VINA docking software<sup>13</sup> (implemented in YASARA) performing 100 runs in a box (85 x 65 x 55 Å) sited in the center of tetramer 2x(LH)<sub>2</sub> including all 4 active sites.

Autodock4<sup>14</sup> software and Autodock4<sub>Zn</sub><sup>15</sup> force field were used for docking calculations with **5a(DAB-1)<sub>1</sub>** and **5b(DAB-1)<sub>1</sub>** and the dimeric protein (LH)<sub>2</sub>. A grid box size of 90 x 90 x 126 centered at -20 (x); 12(y); 0(z) was used. The spacing between the grid points was set to 0.55 Å to cover the two catalytic pockets. Lamarckian Genetic Algorithm was used (500 runs) for dockings. Results differing by less than 2.0 Å in positional RMSD were clustered together and represented by the result with the binding energies.

The optimizations of structures obtained by Autodock4 were performed with the Gaussian 16<sup>16</sup> suite of programs at b3lyp/6-31G level of theory. The residues considered for DFT

---

<sup>11</sup> E. Howard, A. Cousido-Siah, M. L. Lepage, J. P. Schneider, A. Bodlenner, A. Mitschler, A. Meli, I. Izzo, A. Alvarez, A. Podjarny, P. Compain, Structural Basis of Outstanding Multivalent Effects in Jack Bean  $\alpha$ -Mannosidase Inhibition. *Angew. Chem., Int. Ed.* 2018, **57**, 8002–8006.

<sup>12</sup> E. Krieger and G. Vriend, YASARA View-molecular graphics for all devices-from smartphones to workstations. *Bioinformatics*, 2014, **30**, 2981-2982.

<sup>13</sup> O. Trott and A. J. Olson, AutoDock Vina: Improving the Speed and Accuracy of Docking with a New Scoring Function, Efficient Optimization, and Multithreading. *J. Comput. Chem.* 2009, **31**, 455-461.

<sup>14</sup> G. M. Morris, R. Huey, W. Lindstrom, M. F. Sanner, R. K. Belew, D. S. Goodsell and A. J. Olson, AutoDock4 and AutoDockTools4: Automated Docking with Selective Receptor Flexibility. *J. Comput. Chem.*, 2009, **30**, 2785-2791.

<sup>15</sup> D. Santos-Martins, S. Forli, M. J. Ramos and A. J. Olson, AutoDock4Zn: An Improved AutoDock Force Field for Small-Molecule Docking to Zinc Metalloproteins. *J. Chem. Inf. Model.*, 2014, **54**, 2371–2379.

<sup>16</sup> Gaussian 16, Revision A.03, M. J. Frisch, G. W. Trucks, H. B. Schlegel, G. E. Scuseria, M. A. Robb, J. R. Cheeseman, G. Scalmani, V. Barone, G. A. Petersson, H. Nakatsuji, X. Li, M. Caricato, A. V. Marenich, J. Bloino, B. G. Janesko, R. Gomperts, B. Mennucci, H. P. Hratchian, J. V. Ortiz, A. F. Izmaylov, J. L. Sonnenberg, D. Williams-Young, F. Ding, F. Lipparini, F. Egidi, J. Goings, B. Peng, A. Petrone, T. Henderson, D. Ranasinghe, V. G. Zakrzewski, J. Gao, N. Rega, G. Zheng, W. Liang, M. Hada, M. Ehara, K. Toyota, R. Fukuda, J. Hasegawa, M. Ishida, T. Nakajima, Y. Honda, O. Kitao, H. Nakai, T. Vreven, K. Throssell, J. A. Montgomery, Jr., J. E. Peralta, F. Ogliaro, M. J. Bearpark, J. J. Heyd, E. N. Brothers, K. N. Kudin, V. N. Staroverov, T. A. Keith, R. Kobayashi, J. Normand, K. Raghavachari, A. P. Rendell, J. C. Burant, S. S. Iyengar, J. Tomasi, M. Cossi, J. M. Millam, M. Klene, C. Adamo, R. Cammi, J. W. Ochterski, R. L. Martin, K. Morokuma, O. Farkas, J. B. Foresman, and D. J. Fox, Gaussian, Inc., Wallingford CT, 2016.

investigation were His 23, Asp 24, Asp 25, Trp 28, Asp 145, Phe 147, Arg 170, Tyr 210, Asp 268, Trp 333, His 385, His 386, Asp 387, Tyr 625, Arg 789 and Gly 790. Natural bond orbital (NBO) analyses were performed with NBO 3.1 version implemented in Gaussian 16 via single point energy calculations using the b3lyp/6-31G method. The non-covalent interaction (NCI) index was analyzed with the Multiwfn program, and its plot was graphed with Chemcraft (version 1.8).

## Molecular Dynamics Optimized structures of 3a, 4a, 5a and 5b

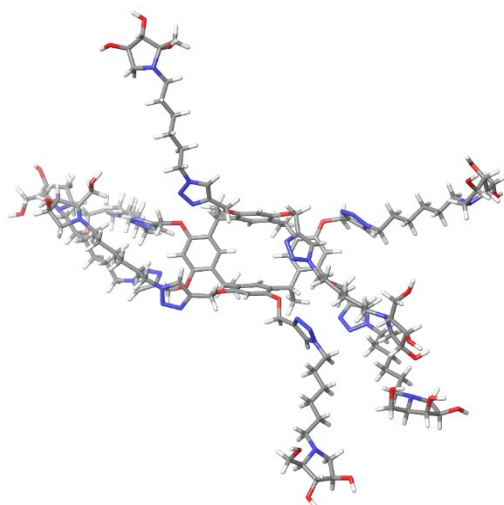

Figure S30: Lowest energy structure of 3a

|   |              |             |             |   |              |             |              |
|---|--------------|-------------|-------------|---|--------------|-------------|--------------|
| O | -15.49010000 | 15.57640000 | -2.71110000 | C | -10.75440000 | 11.23050000 | -8.78700000  |
| O | -16.18220000 | 16.78410000 | -7.41280000 | C | -15.18740000 | 14.18380000 | -8.96100000  |
| C | -15.12810000 | 15.53920000 | -4.04920000 | C | -9.14530000  | 10.47250000 | -3.11850000  |
| C | -15.79970000 | 16.26870000 | -5.04270000 | H | -10.14100000 | 10.08500000 | -3.33410000  |
| C | -15.49130000 | 16.12860000 | -6.40220000 | H | -8.44890000  | 9.63690000  | -3.17970000  |
| C | -14.45510000 | 15.25590000 | -6.77450000 | C | -11.96010000 | 10.28340000 | -8.60160000  |
| C | -13.73870000 | 14.57630000 | -5.77910000 | H | -11.65220000 | 9.24240000  | -8.70270000  |
| C | -14.07280000 | 14.69510000 | -4.42800000 | H | -12.40970000 | 10.39630000 | -7.61470000  |
| C | -14.12010000 | 15.05820000 | -8.26430000 | H | -9.17990000  | 16.10760000 | -2.92830000  |
| O | -8.56390000  | 9.55930000  | -9.46100000 | H | -11.46090000 | 11.89330000 | -4.07470000  |
| O | -6.52960000  | 10.18640000 | -5.08630000 | H | -12.92350000 | 13.91970000 | -6.04280000  |
| C | -8.57740000  | 10.03520000 | -8.16050000 | H | -16.60940000 | 16.91240000 | -4.75490000  |
| C | -7.57240000  | 9.75390000  | -7.22290000 | H | -13.14110000 | 12.52570000 | -8.19450000  |
| C | -7.60370000  | 10.30340000 | -5.93980000 | H | -9.64040000  | 15.71590000 | -9.53440000  |
| C | -8.69320000  | 11.09180000 | -5.54230000 | H | -7.72290000  | 11.85550000 | -3.83520000  |
| C | -9.69140000  | 11.38270000 | -6.48180000 | H | -14.22310000 | 16.03870000 | -8.35280000  |
| C | -9.64200000  | 10.87000000 | -7.78460000 | H | -13.49150000 | 14.30270000 | -2.40010000  |
| C | -8.75170000  | 11.60520000 | -4.09080000 | H | -6.72960000  | 9.14880000  | -7.49640000  |
| O | -7.58140000  | 14.11440000 | -3.24610000 | H | -10.52080000 | 12.02120000 | -6.22120000  |
| O | -11.89940000 | 16.23620000 | -2.85930000 | H | -10.39310000 | 11.03190000 | -9.79710000  |
| C | -8.94290000  | 14.06770000 | -3.45030000 | H | -14.94950000 | 14.04310000 | -10.01600000 |
| C | -9.70570000  | 15.20450000 | -3.18930000 | H | -16.17220000 | 14.64660000 | -8.91010000  |
| C | -11.10650000 | 15.15710000 | -3.19430000 | H | -15.26910000 | 13.20000000 | -8.49990000  |
| C | -11.75650000 | 13.95140000 | -3.50300000 | H | -12.72890000 | 10.46660000 | -9.35220000  |
| C | -10.98010000 | 12.82890000 | -3.83290000 | H | -9.13880000  | 10.82170000 | -2.08580000  |
| C | -9.57800000  | 12.87480000 | -3.82460000 | C | -13.87210000 | 12.44180000 | -3.30220000  |
| C | -13.29720000 | 13.87270000 | -3.38400000 | H | -13.38180000 | 11.86010000 | -2.52090000  |
| O | -12.05710000 | 16.83150000 | -9.02010000 | H | -14.93640000 | 12.46670000 | -3.06660000  |
| O | -8.91740000  | 13.11980000 | -9.68520000 | H | -13.76010000 | 11.90910000 | -4.24670000  |
| C | -11.68910000 | 15.49860000 | -8.94050000 | C | -16.27620000 | 16.65840000 | -2.19890000  |
| C | -10.40740000 | 15.02220000 | -9.24960000 | H | -16.03200000 | 16.74190000 | -1.14000000  |
| C | -10.11440000 | 13.65010000 | -9.24230000 | H | -15.95030000 | 17.59980000 | -2.64030000  |
| C | -11.09830000 | 12.73710000 | -8.83470000 | C | -11.30450000 | 17.48870000 | -2.53990000  |
| C | -12.37250000 | 13.21520000 | -8.50640000 | H | -10.66650000 | 17.81500000 | -3.36320000  |
| C | -12.68380000 | 14.58010000 | -8.56690000 | H | -10.67300000 | 17.39640000 | -1.65470000  |

|   |              |             |              |   |              |             |              |
|---|--------------|-------------|--------------|---|--------------|-------------|--------------|
| C | -17.16260000 | 17.78520000 | -7.12270000  | H | -1.24440000  | 14.73440000 | -5.45150000  |
| H | -17.17380000 | 18.44850000 | -7.98780000  | H | -1.70450000  | 15.02090000 | -3.79800000  |
| H | -16.85720000 | 18.42040000 | -6.29140000  | C | -0.11250000  | 13.56060000 | -4.04370000  |
| C | -7.50840000  | 8.72570000  | -9.94780000  | H | -0.29470000  | 13.03620000 | -3.10490000  |
| H | -7.80330000  | 8.37340000  | -10.93620000 | H | 0.17280000   | 12.80280000 | -4.77540000  |
| H | -7.44250000  | 7.82740000  | -9.33270000  | C | 1.01890000   | 14.59440000 | -3.87420000  |
| C | -5.99760000  | 8.89600000  | -4.81510000  | H | 1.12930000   | 15.20530000 | -4.77250000  |
| H | -5.57900000  | 8.46010000  | -5.72220000  | H | 0.87090000   | 15.24690000 | -3.01140000  |
| H | -6.78830000  | 8.22330000  | -4.47850000  | C | 2.52760000   | 12.98620000 | -2.45080000  |
| C | -7.24340000  | 14.11340000 | -1.85740000  | C | 3.85790000   | 13.37350000 | -1.77630000  |
| H | -7.71420000  | 13.25520000 | -1.37210000  | C | 4.66670000   | 14.10160000 | -2.86900000  |
| H | -7.65740000  | 14.99660000 | -1.36850000  | C | 3.59660000   | 14.86770000 | -5.86920000  |
| C | -11.09740000 | 17.86240000 | -9.25300000  | N | 2.38960000   | 13.89750000 | -3.69810000  |
| H | -10.40510000 | 17.58520000 | -10.04710000 | O | 4.50670000   | 12.29330000 | -1.09420000  |
| H | -10.50540000 | 18.02440000 | -8.35140000  | H | 3.60780000   | 14.12240000 | -1.02180000  |
| C | -7.72910000  | 13.90470000 | -9.73970000  | O | 5.67900000   | 14.96900000 | -2.39120000  |
| H | -7.87170000  | 14.87640000 | -10.21000000 | H | 5.12320000   | 13.35190000 | -3.52040000  |
| H | -7.05140000  | 13.38590000 | -10.41740000 | H | 3.26500000   | 15.72950000 | -3.08340000  |
| N | -18.28800000 | 15.59720000 | -3.25660000  | H | 5.05750000   | 11.79790000 | -1.71580000  |
| N | -19.66390000 | 15.65770000 | -3.22280000  | H | 6.41930000   | 14.47530000 | -2.01790000  |
| N | -19.97700000 | 16.54870000 | -2.28530000  | C | 4.08470000   | 15.34080000 | -5.05160000  |
| C | -17.78160000 | 16.44160000 | -2.36710000  | H | 3.38050000   | 16.04230000 | -5.50310000  |
| C | -18.84320000 | 17.05620000 | -1.70550000  | H | 5.04470000   | 15.85820000 | -4.97950000  |
| H | -18.88450000 | 17.79650000 | -0.92360000  | O | 4.19260000   | 14.18540000 | -5.86680000  |
| C | -21.38000000 | 16.88110000 | -2.05930000  | H | 4.60480000   | 14.44150000 | -6.70540000  |
| H | -21.46910000 | 17.44360000 | -1.12950000  | H | 2.49420000   | 11.95930000 | -2.82100000  |
| H | -21.90440000 | 15.93600000 | -1.90690000  | H | 1.67580000   | 13.17760000 | -1.79580000  |
| C | -21.97460000 | 17.66600000 | -3.25950000  | N | -19.65110000 | 17.90610000 | -7.04690000  |
| H | -21.50080000 | 17.34280000 | -4.18700000  | N | -20.75570000 | 17.11110000 | -6.78310000  |
| H | -21.72390000 | 18.72180000 | -3.15370000  | N | -20.28050000 | 15.88510000 | -6.51660000  |
| C | -23.49630000 | 17.48860000 | -3.42280000  | C | -18.54640000 | 17.17570000 | -6.92520000  |
| H | -23.70680000 | 16.42120000 | -3.51970000  | C | -18.91460000 | 15.88030000 | -6.59260000  |
| H | -24.00590000 | 17.81420000 | -2.51360000  | H | -18.33300000 | 14.99630000 | -6.37650000  |
| C | -24.07000000 | 18.23560000 | -4.64610000  | C | -21.16210000 | 14.78650000 | -6.12290000  |
| H | -23.44350000 | 18.03130000 | -5.51760000  | H | -21.41770000 | 14.93560000 | -5.07510000  |
| H | -24.00890000 | 19.31090000 | -4.46880000  | H | -20.58180000 | 13.86400000 | -6.17270000  |
| C | -25.52230000 | 17.82700000 | -4.96330000  | C | -22.44920000 | 14.66250000 | -6.67730000  |
| H | -26.13620000 | 17.96970000 | -4.07170000  | H | -23.03420000 | 15.57910000 | -6.88760000  |
| H | -25.53950000 | 16.75660000 | -5.17310000  | H | -22.18600000 | 14.55620000 | -8.02810000  |
| C | -26.14310000 | 18.61670000 | -6.13470000  | C | -23.30380000 | 13.45890000 | -6.52480000  |
| H | -26.30770000 | 19.66140000 | -5.86500000  | H | -22.72840000 | 12.54240000 | -6.67730000  |
| H | -25.54770000 | 18.56990000 | -7.04890000  | H | -23.47150000 | 13.52660000 | -5.44750000  |
| C | -27.51740000 | 16.60660000 | -7.07430000  | C | -24.66250000 | 13.33640000 | -7.24250000  |
| C | -28.50400000 | 16.59930000 | -8.25460000  | H | -25.22980000 | 14.25460000 | -7.08790000  |
| C | -29.35780000 | 17.87160000 | -8.07820000  | H | -24.49820000 | 13.25030000 | -8.31890000  |
| C | -28.37660000 | 18.89230000 | -7.47130000  | C | -25.47500000 | 12.12640000 | -6.73630000  |
| N | -27.53600000 | 18.04120000 | -6.48950000  | H | -24.91480000 | 11.21320000 | -6.94590000  |
| O | -29.21200000 | 15.36990000 | -8.33550000  | H | -25.56150000 | 12.18280000 | -5.64970000  |
| H | -27.91770000 | 16.71820000 | -9.17000000  | C | -26.88320000 | 12.02320000 | -7.35140000  |
| O | -29.93660000 | 18.36790000 | -9.27240000  | H | -27.45950000 | 12.93000000 | -7.19700000  |
| H | -30.14710000 | 17.66130000 | -7.35110000  | H | -26.87910000 | 11.81790000 | -8.42390000  |
| H | -27.67750000 | 19.22310000 | -8.24370000  | C | -27.18840000 | 9.44880000  | -6.98530000  |
| H | -29.73250000 | 15.36210000 | -9.15080000  | C | -28.45100000 | 8.56350000  | -7.01890000  |
| H | -30.81240000 | 17.98710000 | -9.41950000  | C | -29.60230000 | 9.46020000  | -6.51260000  |
| C | -29.07840000 | 20.11280000 | -6.84340000  | C | -29.19470000 | 10.87700000 | -6.94250000  |
| H | -28.36580000 | 20.90850000 | -6.61720000  | N | -27.67440000 | 10.88330000 | -6.66910000  |
| H | -29.82480000 | 20.53730000 | -7.52010000  | O | -28.26920000 | 7.37370000  | -6.27310000  |
| O | -29.67990000 | 19.66050000 | -5.64310000  | H | -28.64430000 | 8.30940000  | -8.06470000  |
| H | -30.28900000 | 20.33850000 | -5.31300000  | O | -30.89270000 | 9.13180000  | -6.99670000  |
| H | -26.50120000 | 16.38090000 | -7.40250000  | H | -29.61080000 | 9.42160000  | -5.41930000  |
| H | -27.80430000 | 15.94440000 | -6.25520000  | H | -29.29690000 | 10.96860000 | -8.02680000  |
| N | -7.14000000  | 15.07990000 | -7.62860000  | H | -28.85600000 | 6.67720000  | -6.59340000  |
| N | -6.42410000  | 14.86200000 | -6.46240000  | H | -31.21330000 | 8.32500000  | -6.57330000  |
| N | -5.94490000  | 13.61690000 | -6.53990000  | C | -30.00480000 | 11.99290000 | -6.25040000  |
| C | -7.09000000  | 13.98410000 | -8.36960000  | H | -29.89340000 | 12.94530000 | -6.77300000  |
| C | -6.33060000  | 13.03140000 | -7.71250000  | H | -31.07340000 | 11.76240000 | -6.24500000  |
| H | -6.03890000  | 12.03160000 | -7.98090000  | O | -29.51060000 | 12.12600000 | -4.92760000  |
| C | -5.04930000  | 13.08180000 | -5.51900000  | H | -30.22050000 | 12.44950000 | -4.35430000  |
| H | -4.79840000  | 12.05850000 | -5.79860000  | H | -26.47840000 | 9.18470000  | -6.19890000  |
| H | -5.59080000  | 13.03420000 | -4.57370000  | H | -26.68450000 | 9.46610000  | -7.95350000  |
| C | -3.77530000  | 13.94720000 | -5.39920000  | N | -12.89720000 | 19.59250000 | -9.09600000  |
| H | -3.43490000  | 14.22960000 | -6.39780000  | N | -13.34840000 | 20.71740000 | -9.76560000  |
| H | -4.03750000  | 14.88230000 | -4.89820000  | N | -12.47990000 | 20.93570000 | -10.75450000 |
| C | -2.61060000  | 13.26730000 | -4.65690000  | C | -11.80470000 | 19.13510000 | -9.69490000  |
| H | -2.94800000  | 12.92120000 | -3.67790000  | C | -11.50090000 | 19.97960000 | -10.75650000 |
| H | -2.30960000  | 12.37740000 | -5.21100000  | H | -10.71820000 | 19.96990000 | -11.49640000 |
| C | -1.41970000  | 14.23150000 | -4.49780000  | C | -12.68030000 | 22.03580000 | -11.69010000 |

|   |              |             |              |   |              |             |              |
|---|--------------|-------------|--------------|---|--------------|-------------|--------------|
| H | -11.71350000 | 22.51080000 | -11.86220000 | H | 1.18840000   | 14.48150000 | 6.65150000   |
| H | -13.32320000 | 22.78160000 | -11.21800000 | H | -0.23310000  | 14.48930000 | 7.74200000   |
| C | -13.29420000 | 21.52950000 | -13.01420000 | N | -13.13050000 | 18.49950000 | -1.20270000  |
| H | -12.58890000 | 20.84780000 | -13.49430000 | N | -14.08960000 | 19.48980000 | -1.29680000  |
| H | -14.19000000 | 20.94070000 | -12.80420000 | N | -13.89790000 | 20.07900000 | -2.47860000  |
| C | -13.65340000 | 22.66910000 | -13.98680000 | C | -12.40450000 | 18.49720000 | -2.31200000  |
| H | -14.44940000 | 23.27310000 | -13.54720000 | C | -12.85110000 | 19.50900000 | -3.14640000  |
| H | -12.79590000 | 23.33540000 | -14.10120000 | H | -12.55850000 | 19.82450000 | -4.13460000  |
| C | -14.08540000 | 22.15650000 | -15.37410000 | C | -14.81260000 | 21.10630000 | -2.94170000  |
| H | -13.24120000 | 21.63710000 | -15.83310000 | H | -14.35990000 | 21.60840000 | -3.79810000  |
| H | -14.87160000 | 21.40760000 | -15.25750000 | H | -14.92750000 | 21.84690000 | -2.14840000  |
| C | -14.58000000 | 23.27920000 | -16.30640000 | C | -16.16110000 | 20.46470000 | -3.32170000  |
| H | -15.48230000 | 23.72160000 | -15.88140000 | H | -15.98640000 | 19.67870000 | -4.06070000  |
| H | -13.83330000 | 24.07530000 | -16.33510000 | H | -16.59350000 | 19.97470000 | -2.44640000  |
| C | -14.84500000 | 22.78410000 | -17.74030000 | C | -17.16900000 | 21.47180000 | -3.88360000  |
| H | -13.91990000 | 22.44530000 | -18.21030000 | C | -17.38010000 | 22.23780000 | -3.13490000  |
| H | -15.58870000 | 21.98650000 | -17.79490000 | H | -16.72230000 | 21.98920000 | -4.73510000  |
| C | -16.80230000 | 24.42850000 | -18.30010000 | C | -18.46870000 | 20.78180000 | -4.31810000  |
| C | -17.48910000 | 24.67600000 | -19.65760000 | C | -18.22540000 | 19.99090000 | -5.03060000  |
| C | -16.35380000 | 24.67050000 | -20.69770000 | H | -18.92490000 | 20.28230000 | -3.46090000  |
| C | -15.33430000 | 23.66630000 | -20.14120000 | C | -19.46590000 | 21.75660000 | -4.95500000  |
| N | -15.36540000 | 23.94410000 | -18.62070000 | H | -19.78760000 | 22.48110000 | -4.20540000  |
| O | -18.25930000 | 25.86500000 | -19.68260000 | H | -18.96400000 | 22.32300000 | -5.74210000  |
| H | -18.13790000 | 23.82250000 | -19.87100000 | C | -20.66800000 | 21.01310000 | -6.54570000  |
| O | -16.74810000 | 24.33730000 | -22.01700000 | H | -20.33650000 | 20.27670000 | -6.27510000  |
| H | -15.89900000 | 25.66530000 | -20.70710000 | H | -21.29590000 | 20.52910000 | -4.79590000  |
| H | -15.72530000 | 22.65300000 | -20.26450000 | C | -22.34790000 | 23.00290000 | -5.50700000  |
| H | -19.11250000 | 25.73150000 | -19.25390000 | C | -23.29850000 | 23.60120000 | -6.54350000  |
| H | -17.33770000 | 25.02540000 | -22.35320000 | C | -23.72870000 | 22.37790000 | -7.40610000  |
| C | -13.94620000 | 23.77720000 | -20.80100000 | C | -22.62630000 | 21.29750000 | -7.22300000  |
| H | -13.32020000 | 22.91680000 | -20.55650000 | N | -21.55550000 | 21.98470000 | -6.34630000  |
| H | -14.02530000 | 23.81170000 | -21.89080000 | O | -22.61270000 | 24.57050000 | -7.32210000  |
| O | -13.34400000 | 24.95840000 | -20.29960000 | H | -24.16650000 | 24.06230000 | -6.06700000  |
| H | -12.56270000 | 25.16710000 | -20.83100000 | O | -25.01290000 | 21.84340000 | -7.07680000  |
| H | -16.68690000 | 25.32860000 | -17.69300000 | H | -23.77210000 | 22.69830000 | -8.45090000  |
| H | -17.30730000 | 23.64940000 | -17.72580000 | H | -23.00710000 | 20.49570000 | -6.58600000  |
| N | -4.89560000  | 14.92470000 | -2.15740000  | H | -22.56740000 | 25.41770000 | -6.85960000  |
| N | -3.64870000  | 14.76560000 | -1.57690000  | H | -25.67300000 | 22.50730000 | -7.31840000  |
| N | -3.77560000  | 13.77580000 | -0.69230000  | C | -22.09690000 | 20.68430000 | -8.53470000  |
| C | -5.74640000  | 14.07170000 | -1.60230000  | H | -21.45270000 | 19.82380000 | -8.33910000  |
| C | -5.04390000  | 13.26460000 | -0.71580000  | H | -22.91390000 | 20.33040000 | -9.16730000  |
| H | -5.35620000  | 12.47670000 | -0.05010000  | O | -21.35480000 | 21.69100000 | -9.19210000  |
| C | -2.69690000  | 13.49460000 | 0.24860000   | H | -20.98940000 | 21.34840000 | -10.01910000 |
| H | -1.75090000  | 13.52800000 | -0.29330000  | H | -21.63750000 | 23.71750000 | -5.08610000  |
| H | -2.82870000  | 12.48050000 | 0.62890000   | H | -22.86610000 | 22.46100000 | -4.71350000  |
| C | -2.73920000  | 14.53730000 | 1.39440000   | N | -6.04230000  | 10.65690000 | -10.56130000 |
| H | -2.70330000  | 15.54480000 | 0.97120000   | N | -4.71870000  | 11.05210000 | -10.48610000 |
| H | -3.70870000  | 14.46330000 | 1.89400000   | N | -4.06510000  | 10.05300000 | -9.89480000  |
| C | -1.62340000  | 14.40770000 | 2.44950000   | C | -6.16790000  | 9.44620000  | -10.03830000 |
| H | -1.59840000  | 13.38630000 | 2.83280000   | C | -4.91810000  | 9.02410000  | -9.60130000  |
| H | -0.65650000  | 14.58880000 | 1.97800000   | H | -4.57560000  | 8.11650000  | -9.13330000  |
| C | -1.83450000  | 15.39410000 | 3.62020000   | C | -2.62810000  | 10.13240000 | -9.67830000  |
| H | -1.94040000  | 16.40620000 | 3.22360000   | H | -2.36590000  | 9.43400000  | -8.88360000  |
| H | -2.78780000  | 15.16700000 | 4.10200000   | H | -2.39390000  | 11.13580000 | -9.31890000  |
| C | -0.71060000  | 15.37870000 | 4.67360000   | C | -1.85700000  | 9.80800000  | -10.97460000 |
| H | -0.56750000  | 14.35160000 | 5.01160000   | H | -2.15480000  | 8.81990000  | -11.33210000 |
| H | 0.22450000   | 15.68740000 | 4.20370000   | H | -2.14600000  | 10.51190000 | -11.75860000 |
| C | -1.01510000  | 16.28580000 | 5.88860000   | C | -0.32850000  | 9.84510000  | -10.79110000 |
| H | -1.20930000  | 17.31510000 | 5.58020000   | H | -0.02700000  | 10.85120000 | -10.49270000 |
| H | -1.85010000  | 15.92230000 | 6.49230000   | H | -0.04630000  | 9.18240000  | -9.97080000  |
| C | 0.66550000   | 15.03030000 | 7.43680000   | C | 0.42670000   | 9.43170000  | -12.06790000 |
| C | 1.54810000   | 15.40030000 | 8.64350000   | H | 0.10760000   | 8.42850000  | -12.35980000 |
| C | 1.28630000   | 16.90730000 | 8.91500000   | H | 0.13100000   | 10.09100000 | -12.88750000 |
| C | 0.05950000   | 17.28600000 | 8.05930000   | C | 1.95770000   | 9.46150000  | -11.90570000 |
| N | 0.21390000   | 16.37200000 | 6.82490000   | H | 2.26080000   | 10.47160000 | -11.62870000 |
| O | 2.90600000   | 15.10060000 | 8.34710000   | H | 2.24250000   | 8.81450000  | -11.07440000 |
| H | 1.20680000   | 14.81110000 | 9.49890000   | C | 2.68680000   | 9.00490000  | -13.18550000 |
| O | 1.07760000   | 17.24740000 | 10.27320000  | H | 2.40470000   | 7.97930000  | -13.42120000 |
| H | 2.14330000   | 17.47570000 | 8.54230000   | H | 2.47150000   | 9.64040000  | -14.04590000 |
| H | -0.85310000  | 16.94520000 | 8.55620000   | C | 4.82390000   | 10.43830000 | -12.87210000 |
| H | 3.42380000   | 15.09350000 | 9.16340000   | C | 5.81830000   | 10.58650000 | -14.04430000 |
| H | 1.91550000   | 17.29560000 | 10.74970000  | C | 5.43030000   | 9.46250000  | -15.03310000 |
| C | -0.04570000  | 18.79730000 | 7.77220000   | C | 5.06680000   | 8.31400000  | -14.08030000 |
| H | -1.01940000  | 19.05440000 | 7.34990000   | N | 4.22550000   | 9.00610000  | -12.97130000 |
| H | 0.06350000   | 19.38170000 | 8.68960000   | O | 5.82480000   | 11.90490000 | -14.57570000 |
| O | 0.97660000   | 19.12060000 | 6.84420000   | H | 6.81600000   | 10.36890000 | -13.65260000 |
| H | 1.05080000   | 20.08500000 | 6.78800000   | O | 4.32100000   | 9.79820000  | -15.85640000 |

|                         |             |             |              |                           |
|-------------------------|-------------|-------------|--------------|---------------------------|
| H                       | 6.28260000  | 9.20970000  | -15.66770000 | 24 25 1.5 27 1.0          |
| H                       | 5.97010000  | 8.02720000  | -13.53590000 | 25 26 1.5 45 1.0          |
| H                       | 6.60960000  | 12.05710000 | -15.11740000 | 26                        |
| H                       | 4.47710000  | 10.66090000 | -16.26630000 | 27 52 1.0 61 1.0          |
| C                       | 4.51530000  | 7.03130000  | -14.73750000 | 28 30 1.0 83 1.0          |
| H                       | 3.60860000  | 7.22200000  | -15.31490000 | 29 32 1.0 86 1.0          |
| H                       | 5.24610000  | 6.60040000  | -15.42390000 | 30 31 1.5 35 1.5          |
| O                       | 4.24980000  | 6.11850000  | -13.69010000 | 31 32 1.5 49 1.0          |
| H                       | 4.06550000  | 5.24570000  | -14.06410000 | 32 33 1.5                 |
| H                       | 5.30730000  | 10.50000000 | -11.89590000 | 33 34 1.5 36 1.0          |
| H                       | 4.01330000  | 11.16870000 | -12.92550000 | 34 35 1.5 48 1.0          |
| N                       | -5.14020000 | 9.65660000  | -2.60760000  | 35                        |
| N                       | -3.99140000 | 9.62950000  | -1.84030000  | 36 41 1.0 55 1.0          |
| N                       | -3.06820000 | 8.99500000  | -2.56610000  | 37 56 1.0 57 1.0 58 1.0   |
| C                       | -4.91600000 | 9.03100000  | -3.75510000  | 38 39 1.0 40 1.0 60 1.0   |
| C                       | -3.59400000 | 8.60130000  | -3.76900000  | 39                        |
| H                       | -3.01060000 | 8.05660000  | -4.49200000  | 40                        |
| C                       | -1.72640000 | 8.74780000  | -2.04000000  | 41 42 1.0 43 1.0 59 1.0   |
| H                       | -1.06510000 | 8.56070000  | -2.88690000  | 42                        |
| H                       | -1.77580000 | 7.82370000  | -1.46160000  | 43                        |
| C                       | -1.18220000 | 9.90720000  | -1.16640000  | 44                        |
| H                       | -1.23240000 | 10.84640000 | -1.72090000  | 45                        |
| H                       | -1.83040000 | 10.03010000 | -0.29550000  | 46                        |
| C                       | 0.25930000  | 9.65760000  | -0.68710000  | 47                        |
| H                       | 0.32520000  | 8.65800000  | -0.25150000  | 48                        |
| H                       | 0.92590000  | 9.65220000  | -1.55080000  | 49                        |
| C                       | 0.74270000  | 10.68560000 | 0.35290000   | 50                        |
| H                       | 0.58400000  | 11.69360000 | -0.03370000  | 51                        |
| H                       | 0.12150000  | 10.60590000 | 1.24770000   | 52                        |
| C                       | 2.22600000  | 10.49250000 | 0.72130000   | 53                        |
| H                       | 2.36750000  | 9.47430000  | 1.08870000   | 54                        |
| H                       | 2.82840000  | 10.56780000 | -0.18290000  | 55                        |
| C                       | 2.72410000  | 11.48480000 | 1.79020000   | 56                        |
| H                       | 2.38630000  | 12.50040000 | 1.57550000   | 57                        |
| H                       | 2.42720000  | 11.20260000 | 2.80250000   | 58                        |
| C                       | 5.05910000  | 10.27140000 | 1.95780000   | 59                        |
| C                       | 6.39590000  | 10.67680000 | 2.62410000   | 60                        |
| C                       | 6.38130000  | 12.22730000 | 2.65530000   | 61 62 1.0 63 1.0 64 1.0   |
| C                       | 4.88510000  | 12.55290000 | 2.80890000   | 62                        |
| N                       | 4.26680000  | 11.58970000 | 1.76910000   | 63                        |
| O                       | 7.53680000  | 10.14030000 | 1.97010000   | 64                        |
| H                       | 6.37780000  | 10.32690000 | 3.65940000   | 65 66 1.0 67 1.0 92 1.0   |
| O                       | 6.90200000  | 12.80000000 | 1.45680000   | 66                        |
| H                       | 6.96610000  | 12.59200000 | 3.50350000   | 67                        |
| H                       | 4.53580000  | 12.18430000 | 3.77710000   | 68 69 1.0 70 1.0 307 1.0  |
| H                       | 7.66840000  | 9.21200000  | 2.20600000   | 69                        |
| H                       | 7.75290000  | 12.36210000 | 1.28770000   | 70                        |
| C                       | 4.50490000  | 14.04760000 | 2.70330000   | 71 72 1.0 73 1.0 178 1.0  |
| H                       | 3.48260000  | 14.21010000 | 3.04900000   | 72                        |
| H                       | 5.15010000  | 14.66710000 | 3.33060000   | 73                        |
| O                       | 4.58960000  | 14.46370000 | 1.35780000   | 74 75 1.0 76 1.0 350 1.0  |
| H                       | 5.53140000  | 14.49760000 | 1.12280000   | 75                        |
| H                       | 5.16980000  | 9.83380000  | 0.96390000   | 76                        |
| H                       | 4.46560000  | 9.61720000  | 2.60000000   | 77 78 1.0 79 1.0 393 1.0  |
| 1 3 1.0 65 1.0          |             |             |              | 78                        |
| 2 5 1.0 71 1.0          |             |             |              | 79                        |
| 3 4 1.5 8 1.5           |             |             |              | 80 81 1.0 82 1.0 264 1.0  |
| 4 5 1.5 47 1.0          |             |             |              | 81                        |
| 5 6 1.5                 |             |             |              | 82                        |
| 6 7 1.5 9 1.0           |             |             |              | 83 84 1.0 85 1.0 221 1.0  |
| 7 8 1.5 46 1.0          |             |             |              | 84                        |
| 8 27 1.0                |             |             |              | 85                        |
| 9 35 1.0 37 1.0 51 1.0  |             |             |              | 86 87 1.0 88 1.0 135 1.0  |
| 10 12 1.0 74 1.0        |             |             |              | 87                        |
| 11 14 1.0 77 1.0        |             |             |              | 88                        |
| 12 13 1.5 17 1.5        |             |             |              | 89 90 1.5 92 1.5          |
| 13 14 1.5 53 1.0        |             |             |              | 90 91 1.5                 |
| 14 15 1.5               |             |             |              | 91 93 1.5 95 1.0          |
| 15 16 1.5 18 1.0        |             |             |              | 92 93 1.5                 |
| 16 17 1.5 54 1.0        |             |             |              | 93 94 1.0                 |
| 17 36 1.0               |             |             |              | 94                        |
| 18 26 1.0 38 1.0 50 1.0 |             |             |              | 95 96 1.0 97 1.0 98 1.0   |
| 19 21 1.0 80 1.0        |             |             |              | 96                        |
| 20 23 1.0 68 1.0        |             |             |              | 97                        |
| 21 22 1.5 26 1.5        |             |             |              | 98 99 1.0 100 1.0 101 1.0 |
| 22 23 1.5 44 1.0        |             |             |              | 99                        |
| 23 24 1.5               |             |             |              | 100                       |

|     |     |     |     |     |     |     |     |     |     |     |     |
|-----|-----|-----|-----|-----|-----|-----|-----|-----|-----|-----|-----|
| 101 | 102 | 1.0 | 103 | 1.0 | 104 | 1.0 | 178 | 179 | 1.5 |     |     |
| 102 |     |     |     |     |     |     | 179 | 180 | 1.0 |     |     |
| 103 |     |     |     |     |     |     | 180 |     |     |     |     |
| 104 | 105 | 1.0 | 106 | 1.0 | 107 | 1.0 | 181 | 182 | 1.0 |     |     |
| 105 |     |     |     |     |     |     | 183 | 1.0 | 184 | 1.0 |     |
| 106 |     |     |     |     |     |     | 182 |     |     |     |     |
| 107 | 108 | 1.0 | 109 | 1.0 | 110 | 1.0 | 183 |     |     |     |     |
| 108 |     |     |     |     |     |     | 184 | 185 | 1.0 | 186 | 1.0 |
| 109 |     |     |     |     |     |     | 185 |     |     |     |     |
| 110 | 111 | 1.0 | 112 | 1.0 | 117 | 1.0 | 186 |     |     |     |     |
| 111 |     |     |     |     |     |     | 187 | 188 | 1.0 | 189 | 1.0 |
| 112 |     |     |     |     |     |     | 188 |     |     |     |     |
| 113 | 114 | 1.0 | 117 | 1.0 | 130 | 1.0 | 189 |     |     |     |     |
| 114 | 115 | 1.0 | 118 | 1.0 | 119 | 1.0 | 190 | 191 | 1.0 | 192 | 1.0 |
| 115 | 116 | 1.0 | 120 | 1.0 | 121 | 1.0 | 191 |     |     |     |     |
| 116 | 117 | 1.0 | 122 | 1.0 | 125 | 1.0 | 192 |     |     |     |     |
| 117 |     |     |     |     |     |     | 193 | 194 | 1.0 | 195 | 1.0 |
| 118 | 123 | 1.0 |     |     |     |     | 194 |     |     |     |     |
| 119 |     |     |     |     |     |     | 195 |     |     |     |     |
| 120 | 124 | 1.0 |     |     |     |     | 196 | 197 | 1.0 | 198 | 1.0 |
| 121 |     |     |     |     |     |     | 197 |     |     |     |     |
| 122 |     |     |     |     |     |     | 198 |     |     |     |     |
| 123 |     |     |     |     |     |     | 199 | 200 | 1.0 | 203 | 1.0 |
| 124 |     |     |     |     |     |     | 200 | 201 | 1.0 | 204 | 1.0 |
| 125 | 126 | 1.0 | 127 | 1.0 | 128 | 1.0 | 201 | 202 | 1.0 | 206 | 1.0 |
| 126 |     |     |     |     |     |     | 202 | 203 | 1.0 | 208 | 1.0 |
| 127 |     |     |     |     |     |     | 203 |     |     |     |     |
| 128 | 129 | 1.0 |     |     |     |     | 204 | 209 | 1.0 |     |     |
| 129 |     |     |     |     |     |     | 205 |     |     |     |     |
| 130 |     |     |     |     |     |     | 206 | 210 | 1.0 |     |     |
| 131 |     |     |     |     |     |     | 207 |     |     |     |     |
| 132 | 133 | 1.5 | 135 | 1.5 |     |     | 208 |     |     |     |     |
| 133 | 134 | 1.5 |     |     |     |     | 209 |     |     |     |     |
| 134 | 136 | 1.5 | 138 | 1.0 |     |     | 210 |     |     |     |     |
| 135 | 136 | 1.5 |     |     |     |     | 211 | 212 | 1.0 | 213 | 1.0 |
| 136 | 137 | 1.0 |     |     |     |     | 212 |     |     |     |     |
| 137 |     |     |     |     |     |     | 213 |     |     |     |     |
| 138 | 139 | 1.0 | 140 | 1.0 | 141 | 1.0 | 214 | 215 | 1.0 |     |     |
| 139 |     |     |     |     |     |     | 215 |     |     |     |     |
| 140 |     |     |     |     |     |     | 216 |     |     |     |     |
| 141 | 142 | 1.0 | 143 | 1.0 | 144 | 1.0 | 217 |     |     |     |     |
| 142 |     |     |     |     |     |     | 218 | 219 | 1.5 | 221 | 1.5 |
| 143 |     |     |     |     |     |     | 219 | 220 | 1.5 |     |     |
| 144 | 145 | 1.0 | 146 | 1.0 | 147 | 1.0 | 220 | 222 | 1.5 | 224 | 1.0 |
| 145 |     |     |     |     |     |     | 221 | 222 | 1.5 |     |     |
| 146 |     |     |     |     |     |     | 222 | 223 | 1.0 |     |     |
| 147 | 148 | 1.0 | 149 | 1.0 | 150 | 1.0 | 223 |     |     |     |     |
| 148 |     |     |     |     |     |     | 224 | 225 | 1.0 | 226 | 1.0 |
| 149 |     |     |     |     |     |     | 225 |     |     |     |     |
| 150 | 151 | 1.0 | 152 | 1.0 | 153 | 1.0 | 226 |     |     |     |     |
| 151 |     |     |     |     |     |     | 227 | 228 | 1.0 | 229 | 1.0 |
| 152 |     |     |     |     |     |     | 228 |     |     |     |     |
| 153 | 154 | 1.0 | 155 | 1.0 | 160 | 1.0 | 229 |     |     |     |     |
| 154 |     |     |     |     |     |     | 230 | 231 | 1.0 | 232 | 1.0 |
| 155 |     |     |     |     |     |     | 231 |     |     |     |     |
| 156 | 157 | 1.0 | 160 | 1.0 | 173 | 1.0 | 232 |     |     |     |     |
| 157 | 158 | 1.0 | 161 | 1.0 | 162 | 1.0 | 233 | 234 | 1.0 | 235 | 1.0 |
| 158 | 159 | 1.0 | 163 | 1.0 | 164 | 1.0 | 234 |     |     |     |     |
| 159 | 160 | 1.0 | 165 | 1.0 | 168 | 1.0 | 235 |     |     |     |     |
| 160 |     |     |     |     |     |     | 236 | 237 | 1.0 | 238 | 1.0 |
| 161 | 166 | 1.0 |     |     |     |     | 237 |     |     |     |     |
| 162 |     |     |     |     |     |     | 238 |     |     |     |     |
| 163 | 167 | 1.0 |     |     |     |     | 239 | 240 | 1.0 | 241 | 1.0 |
| 164 |     |     |     |     |     |     | 240 |     |     |     |     |
| 165 |     |     |     |     |     |     | 241 |     |     |     |     |
| 166 |     |     |     |     |     |     | 242 | 243 | 1.0 | 246 | 1.0 |
| 167 |     |     |     |     |     |     | 243 | 244 | 1.0 | 247 | 1.0 |
| 168 | 169 | 1.0 | 170 | 1.0 | 171 | 1.0 | 244 | 245 | 1.0 | 249 | 1.0 |
| 169 |     |     |     |     |     |     | 245 | 246 | 1.0 | 251 | 1.0 |
| 170 |     |     |     |     |     |     | 246 |     |     |     |     |
| 171 | 172 | 1.0 |     |     |     |     | 247 | 252 | 1.0 |     |     |
| 172 |     |     |     |     |     |     | 248 |     |     |     |     |
| 173 |     |     |     |     |     |     | 249 | 253 | 1.0 |     |     |
| 174 |     |     |     |     |     |     | 250 |     |     |     |     |
| 175 | 176 | 1.5 | 178 | 1.5 |     |     | 251 |     |     |     |     |
| 176 | 177 | 1.5 |     |     |     |     | 252 |     |     |     |     |
| 177 | 179 | 1.5 | 181 | 1.0 |     |     | 253 |     |     |     |     |
|     |     |     |     |     |     |     | 254 | 255 | 1.0 | 256 | 1.0 |
|     |     |     |     |     |     |     | 257 | 1.0 |     |     |     |

255  
256  
257 258 1.0  
258  
259  
260  
261 262 1.5 264 1.5  
262 263 1.5  
263 265 1.5 267 1.0  
264 265 1.5  
265 266 1.0  
266  
267 268 1.0 269 1.0 270 1.0  
268  
269  
270 271 1.0 272 1.0 273 1.0  
271  
272  
273 274 1.0 275 1.0 276 1.0  
274  
275  
276 277 1.0 278 1.0 279 1.0  
277  
278  
279 280 1.0 281 1.0 282 1.0  
280  
281  
282 283 1.0 284 1.0 289 1.0  
283  
284  
285 286 1.0 289 1.0 302 1.0 303 1.0  
286 287 1.0 290 1.0 291 1.0  
287 288 1.0 292 1.0 293 1.0  
288 289 1.0 294 1.0 297 1.0  
289  
290 295 1.0  
291  
292 296 1.0  
293  
294  
295  
296  
297 298 1.0 299 1.0 300 1.0  
298  
299  
300 301 1.0  
301  
302  
303  
304 305 1.5 307 1.5  
305 306 1.5  
306 308 1.5 310 1.0  
307 308 1.5  
308 309 1.0  
309  
310 311 1.0 312 1.0 313 1.0  
311  
312  
313 314 1.0 315 1.0 316 1.0  
314  
315  
316 317 1.0 318 1.0 319 1.0  
317  
318  
319 320 1.0 321 1.0 322 1.0  
320  
321  
322 323 1.0 324 1.0 325 1.0  
323  
324  
325 326 1.0 327 1.0 332 1.0  
326  
327  
328 329 1.0 332 1.0 345 1.0 346 1.0  
329 330 1.0 333 1.0 334 1.0  
330 331 1.0 335 1.0 336 1.0  
331 332 1.0 337 1.0 340 1.0

332  
333 338 1.0  
334  
335 339 1.0  
336  
337  
338  
339  
340 341 1.0 342 1.0 343 1.0  
341  
342  
343 344 1.0  
344  
345  
346  
347 348 1.5 350 1.5  
348 349 1.5  
349 351 1.5 353 1.0  
350 351 1.5  
351 352 1.0  
352  
353 354 1.0 355 1.0 356 1.0  
354  
355  
356 357 1.0 358 1.0 359 1.0  
357  
358  
359 360 1.0 361 1.0 362 1.0  
360  
361  
362 363 1.0 364 1.0 365 1.0  
363  
364  
365 366 1.0 367 1.0 368 1.0  
366  
367  
368 369 1.0 370 1.0 375 1.0  
369  
370  
371 372 1.0 375 1.0 388 1.0 389 1.0  
372 373 1.0 376 1.0 377 1.0  
373 374 1.0 378 1.0 379 1.0  
374 375 1.0 380 1.0 383 1.0  
375  
376 381 1.0  
377  
378 382 1.0  
379  
380  
381  
382  
383 384 1.0 385 1.0 386 1.0  
384  
385  
386 387 1.0  
387  
388  
389  
390 391 1.5 393 1.5  
391 392 1.5  
392 394 1.5 396 1.0  
393 394 1.5  
394 395 1.0  
395  
396 397 1.0 398 1.0 399 1.0  
397  
398  
399 400 1.0 401 1.0 402 1.0  
400  
401  
402 403 1.0 404 1.0 405 1.0  
403  
404  
405 406 1.0 407 1.0 408 1.0  
406  
407  
408 409 1.0 410 1.0 411 1.0

409  
 410  
 411 412 1.0 413 1.0 418 1.0  
 412  
 413  
 414 415 1.0 418 1.0 431 1.0 432 1.0  
 415 416 1.0 419 1.0 420 1.0  
 416 417 1.0 421 1.0 422 1.0  
 417 418 1.0 423 1.0 426 1.0  
 418  
 419 424 1.0  
 420  
 421 425 1.0  
 422  
 423  
 424  
 425  
 426 427 1.0 428 1.0 429 1.0  
 427  
 428  
 429 430 1.0  
 430  
 431  
 432

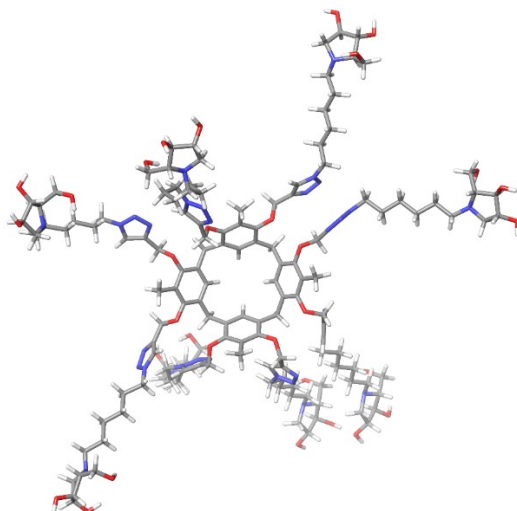

**Figure S31: Lowest energy structure of 4a**

|   |              |             |             |   |              |             |              |
|---|--------------|-------------|-------------|---|--------------|-------------|--------------|
| C | -17.55260000 | 13.91380000 | -3.84970000 | H | -16.60960000 | 14.42610000 | -5.75880000  |
| C | -17.30960000 | 13.74340000 | -2.47610000 | H | -16.19110000 | 12.84140000 | -5.12590000  |
| C | -18.36570000 | 13.82440000 | -1.55780000 | H | -21.96160000 | 14.74010000 | -3.13480000  |
| C | -19.67330000 | 13.96670000 | -2.02770000 | H | -21.44930000 | 14.78380000 | -4.77700000  |
| C | -19.93400000 | 14.07680000 | -3.39580000 | H | -22.70060000 | 12.66410000 | -2.07820000  |
| C | -18.86410000 | 14.12400000 | -4.30220000 | H | -22.57370000 | 9.17320000  | -6.81130000  |
| C | -16.39650000 | 13.87440000 | -4.84450000 | H | -21.44590000 | 10.41650000 | -7.30970000  |
| C | -21.37920000 | 14.18560000 | -3.87170000 | H | -23.16860000 | 10.63370000 | -7.61730000  |
| C | -22.59320000 | 10.95680000 | -5.55390000 | H | -22.66260000 | 11.42010000 | 0.01890000   |
| C | -22.00050000 | 12.21530000 | -5.36790000 | H | -24.59080000 | 11.11760000 | -1.52980000  |
| C | -22.02670000 | 12.82580000 | -4.10700000 | H | -24.81030000 | 9.65000000  | -2.39000000  |
| C | -22.67970000 | 12.19290000 | -3.04970000 | H | -22.57960000 | 5.46890000  | 0.24720000   |
| C | -23.30380000 | 10.95700000 | -3.22910000 | H | -20.86810000 | 5.89450000  | 0.24140000   |
| C | -23.29550000 | 10.35110000 | -4.49620000 | H | -21.72830000 | 5.80550000  | -1.27470000  |
| C | -22.44340000 | 10.25200000 | -6.89930000 | H | -20.39070000 | 12.60030000 | 0.53860000   |
| C | -22.19430000 | 7.57690000  | -0.11040000 | H | -15.77900000 | 10.63370000 | 3.61330000   |
| C | -22.95690000 | 8.22440000  | -1.10170000 | H | -15.29900000 | 10.10980000 | 1.98050000   |
| C | -23.13590000 | 9.61400000  | -1.04070000 | H | -16.34370000 | 9.05620000  | 2.91290000   |
| C | -22.54260000 | 10.34690000 | -0.00980000 | H | -17.09990000 | 14.32590000 | 0.08380000   |
| C | -21.80790000 | 9.70940000  | 0.99150000  | H | -18.75980000 | 14.64780000 | 0.37390000   |
| C | -21.71170000 | 8.31140000  | 0.98570000  | H | -21.79210000 | 11.42290000 | 2.28980000   |
| C | -24.03670000 | 10.33250000 | -2.04600000 | H | -21.19660000 | 9.99730000  | 3.04280000   |
| C | -21.83040000 | 6.09980000  | -0.22940000 | O | -16.03120000 | 13.54080000 | -2.01290000  |
| C | -17.33700000 | 10.83320000 | 2.13370000  | O | -19.09610000 | 14.39980000 | -5.62930000  |
| C | -18.63610000 | 10.37500000 | 2.40730000  | O | -23.52970000 | 7.55410000  | -2.16280000  |
| C | -19.74210000 | 11.00090000 | 1.81010000  | O | -21.15050000 | 7.66330000  | 2.06310000   |
| C | -19.53800000 | 12.11040000 | 0.98470000  | O | -18.82480000 | 9.32340000  | 3.27440000   |
| C | -18.25370000 | 12.61240000 | 0.75120000  | C | -15.54680000 | 12.19900000 | -2.13690000  |
| C | -17.15130000 | 11.98000000 | 1.34780000  | C | -14.18150000 | 12.22070000 | -2.79110000  |
| C | -16.12190000 | 10.10160000 | 2.69670000  | C | -12.99960000 | 12.80750000 | -2.35980000  |
| C | -18.09180000 | 13.90090000 | -0.05720000 | N | -12.09070000 | 12.56280000 | -3.35320000  |
| C | -21.17280000 | 10.54420000 | 2.10390000  | N | -12.65160000 | 11.84410000 | -4.32920000  |
| O | -21.38930000 | 12.84940000 | -6.42400000 | N | -13.96070000 | 11.61880000 | -3.94960000  |
| O | -23.95790000 | 9.15640000  | -4.68080000 | C | -21.68230000 | 14.24010000 | -12.27860000 |
| O | -15.87970000 | 12.47990000 | 1.18760000  | C | -22.59940000 | 13.26050000 | -13.04240000 |
| C | -15.48090000 | 13.42320000 | 2.18370000  | C | -22.90240000 | 13.69680000 | -14.48530000 |
| C | -25.16510000 | 9.21270000  | -5.45060000 | C | -25.33170000 | 12.28170000 | -17.24630000 |
| C | -22.28520000 | 13.54790000 | -7.29130000 | N | -25.95880000 | 12.88830000 | -18.42670000 |
| H | -20.49400000 | 14.00290000 | -1.32640000 | C | -25.06170000 | 13.08000000 | -19.59050000 |
| H | -15.48840000 | 14.29950000 | -4.41600000 | C | -25.84180000 | 12.64400000 | -20.84690000 |



|   |              |             |              |   |              |             |              |
|---|--------------|-------------|--------------|---|--------------|-------------|--------------|
| C | -26.78870000 | 11.57480000 | -20.29520000 | N | -18.57810000 | -0.61580000 | 11.72410000  |
| C | -27.11480000 | 12.11390000 | -18.89810000 | C | -17.64900000 | -1.73190000 | 11.44000000  |
| C | -24.47500000 | 14.50920000 | -19.70760000 | C | -18.04140000 | -2.90330000 | 12.38390000  |
| O | -25.50130000 | 15.48530000 | -19.65350000 | C | -19.06900000 | -2.27900000 | 13.35450000  |
| O | -27.92200000 | 11.33540000 | -21.12180000 | C | -18.84810000 | -0.77710000 | 13.15300000  |
| O | -25.02960000 | 12.15890000 | -21.90890000 | C | -17.54110000 | -2.16220000 | 9.95780000   |
| C | -13.96970000 | 13.56130000 | 2.22630000   | O | -18.82880000 | -2.36920000 | 9.40280000   |
| C | -13.12180000 | 13.58100000 | 3.32610000   | O | -20.41020000 | -2.65100000 | 13.06980000  |
| N | -11.86710000 | 13.76640000 | 2.81320000   | O | -16.91280000 | -3.46030000 | 13.05270000  |
| N | -11.90620000 | 13.81710000 | 1.48040000   | C | -26.32470000 | 9.73730000  | -4.62230000  |
| N | -13.24030000 | 13.70000000 | 1.12910000   | C | -27.24330000 | 9.04560000  | -3.84580000  |
| C | -10.60730000 | 13.89220000 | 3.53210000   | N | -28.03260000 | 10.00900000 | -3.28060000  |
| C | -9.79110000  | 12.58350000 | 3.49670000   | N | -27.67270000 | 11.22170000 | -3.70480000  |
| C | -8.53400000  | 12.67040000 | 4.38080000   | N | -26.60110000 | 11.03150000 | -4.55630000  |
| C | -7.71840000  | 11.36660000 | 4.41400000   | C | -29.11200000 | 9.85290000  | -2.31890000  |
| C | -6.51610000  | 11.45200000 | 5.37780000   | C | -30.47820000 | 10.28490000 | -2.88950000  |
| N | -5.03440000  | 9.80880000  | 4.16290000   | C | -31.59120000 | 10.20340000 | -1.83040000  |
| C | -4.00150000  | 10.76180000 | 3.69340000   | C | -32.97270000 | 10.59960000 | -2.37630000  |
| C | -2.74950000  | 9.94380000  | 3.30100000   | C | -34.06260000 | 10.59780000 | -1.28940000  |
| C | -2.86360000  | 8.72830000  | 4.22340000   | N | -36.43890000 | 11.10890000 | -0.77210000  |
| C | -4.37590000  | 8.49630000  | 4.25580000   | C | -37.73370000 | 11.65030000 | -1.21800000  |
| C | -4.49540000  | 11.71610000 | 2.57810000   | C | -38.69180000 | 11.31590000 | -0.05990000  |
| O | -4.92000000  | 10.99380000 | 1.43690000   | C | -38.24120000 | 9.90060000  | 0.33720000   |
| O | -2.10830000  | 7.60680000  | 3.79440000   | C | -36.77440000 | 9.82740000  | -0.13420000  |
| O | -1.50680000  | 10.62760000 | 3.44110000   | C | -37.73250000 | 13.14620000 | -1.62430000  |
| C | -18.78100000 | 9.69230000  | 4.65410000   | O | -37.31400000 | 13.97710000 | -0.55780000  |
| C | -18.87470000 | 8.45860000  | 5.52880000   | O | -38.45990000 | 9.61130000  | 1.71370000   |
| C | -18.60790000 | 7.12460000  | 5.24410000   | O | -40.07730000 | 11.38930000 | -0.37380000  |
| N | -18.89350000 | 6.43820000  | 6.39510000   | C | -21.82530000 | 13.49650000 | -8.73880000  |
| N | -19.31340000 | 7.28470000  | 7.34160000   | C | -22.18310000 | 14.33200000 | -9.78730000  |
| N | -19.27620000 | 8.55090000  | 6.78680000   | N | -21.55260000 | 13.82550000 | -10.88940000 |
| C | -27.79830000 | 8.13980000  | 1.60540000   | N | -20.82710000 | 12.75460000 | -10.56540000 |
| C | -28.99950000 | 9.04080000  | 1.23520000   | N | -21.00510000 | 12.56480000 | -9.20660000  |
| C | -29.91120000 | 9.38580000  | 2.42490000   | C | -10.70270000 | 13.00520000 | -3.44790000  |
| C | -31.21130000 | 10.06500000 | 1.95850000   | C | -9.66730000  | 11.87730000 | -3.20360000  |
| C | -32.21530000 | 10.33490000 | 3.09140000   | C | -9.70600000  | 10.66660000 | -4.16270000  |
| C | -33.56960000 | 10.82020000 | 2.54120000   | C | -9.60080000  | 11.03120000 | -5.65870000  |
| N | -34.52000000 | 11.14820000 | 3.60660000   | C | -9.55380000  | 9.80370000  | -6.59510000  |
| C | -35.76520000 | 11.75590000 | 3.10640000   | N | -7.11980000  | 9.89740000  | -7.09410000  |
| C | -36.82580000 | 11.48500000 | 4.18700000   | C | -5.75950000  | 9.40810000  | -6.82530000  |
| C | -36.42930000 | 10.09240000 | 4.70150000   | C | -4.86520000  | 10.13790000 | -7.84770000  |
| C | -34.91590000 | 10.00630000 | 4.44390000   | C | -5.76870000  | 10.21080000 | -9.09000000  |
| C | -35.63140000 | 13.24520000 | 2.70480000   | C | -7.19690000  | 10.23240000 | -8.52150000  |
| O | -35.05100000 | 14.00150000 | 3.75280000   | C | -5.31500000  | 9.58860000  | -5.35110000  |
| O | -36.82310000 | 9.84550000  | 6.04320000   | O | -5.53550000  | 10.91900000 | -4.91550000  |
| O | -38.16800000 | 11.51800000 | 3.71350000   | O | -5.46220000  | 11.28740000 | -9.96230000  |
| C | -22.08630000 | 6.96180000  | 2.89450000   | O | -3.60710000  | 9.51780000  | -8.11510000  |
| C | -22.56720000 | 7.83380000  | 4.04170000   | C | -19.11160000 | 15.79720000 | -5.91840000  |
| C | -22.22500000 | 7.77320000  | 5.38070000   | C | -19.35330000 | 16.03530000 | -7.39440000  |
| N | -22.82140000 | 8.85430000  | 5.96530000   | C | -18.53150000 | 15.76330000 | -8.47890000  |
| N | -23.57470000 | 9.50460000  | 5.07370000   | N | -19.15610000 | 16.33380000 | -9.55350000  |
| N | -23.42980000 | 8.82660000  | 3.87280000   | N | -20.31100000 | 16.89460000 | -9.18540000  |
| C | -22.66170000 | 9.31980000  | 7.33850000   | N | -20.42690000 | 16.68480000 | -7.82300000  |
| C | -23.98390000 | 9.39930000  | 8.13480000   | N | -18.65360000 | 16.50530000 | -10.90930000 |
| C | -24.76380000 | 10.71640000 | 7.95020000   | C | -18.06830000 | 17.92650000 | -11.06550000 |
| C | -25.88510000 | 10.88240000 | 8.99390000   | C | -17.45650000 | 18.21510000 | -12.44650000 |
| C | -26.46370000 | 12.30870000 | 9.04820000   | C | -16.83970000 | 19.62540000 | -12.50480000 |
| C | -27.41820000 | 12.51240000 | 10.24140000  | C | -16.18420000 | 19.96240000 | -13.85530000 |
| N | -27.55200000 | 13.92910000 | 10.59650000  | N | -14.75020000 | 21.62040000 | -15.06050000 |
| C | -28.57420000 | 14.70200000 | 9.85820000   | C | -15.56000000 | 21.74240000 | -16.29650000 |
| C | -29.06610000 | 15.83370000 | 10.80760000  | C | -15.17550000 | 23.06540000 | -16.99380000 |
| C | -28.30650000 | 15.57980000 | 12.12570000  | C | -14.64780000 | 23.91500000 | -15.83380000 |
| C | -27.93500000 | 14.10180000 | 11.99780000  | C | -13.97240000 | 22.86160000 | -14.95120000 |
| C | -28.12750000 | 15.22790000 | 8.47350000   | C | -15.45510000 | 20.50350000 | -17.21880000 |
| O | -26.90130000 | 15.93150000 | 8.58170000   | O | -14.10190000 | 20.20620000 | -17.52350000 |
| O | -27.15450000 | 16.39730000 | 12.27690000  | O | -13.80100000 | 24.98140000 | -16.24630000 |
| O | -30.47850000 | 15.80750000 | 10.98330000  | O | -16.24160000 | 23.69970000 | -17.68950000 |
| C | -24.47320000 | 6.50440000  | -1.91780000  | C | -23.87940000 | 12.73410000 | -15.18530000 |
| C | -25.68520000 | 6.92600000  | -1.09250000  | C | -24.28640000 | 13.20430000 | -16.59260000 |
| C | -25.78880000 | 7.61150000  | 0.11650000   | C | -15.54010000 | 21.36280000 | -13.85060000 |
| N | -27.12330000 | 7.61210000  | 0.42240000   | C | -8.20930000  | 9.04590000  | -6.60470000  |
| N | -27.81320000 | 6.96250000  | -0.51980000  | C | -18.15920000 | 2.64040000  | 9.69590000   |
| N | -26.89810000 | 6.55170000  | -1.46750000  | C | -18.43710000 | 1.15050000  | 9.97520000   |
| C | -18.89870000 | 4.99240000  | 6.61240000   | C | -35.44490000 | 10.98530000 | -1.84380000  |
| C | -18.39690000 | 4.57230000  | 8.01600000   | C | -5.65670000  | 10.17350000 | 5.44400000   |
| C | -18.54730000 | 3.05980000  | 8.26530000   | H | -16.23230000 | 11.55440000 | -2.69430000  |
| C | -18.08480000 | 0.73270000  | 11.41600000  | H | -15.47760000 | 11.74810000 | -1.14950000  |

|   |              |             |              |   |              |             |              |
|---|--------------|-------------|--------------|---|--------------|-------------|--------------|
| H | -12.74740000 | 13.38100000 | -1.48250000  | H | -24.79760000 | 6.18260000  | -2.90830000  |
| H | -23.54150000 | 13.15490000 | -12.50040000 | H | -25.05760000 | 8.06340000  | 0.76890000   |
| H | -22.14470000 | 12.26750000 | -13.05410000 | H | -18.96030000 | 5.10420000  | 8.78520000   |
| H | -21.97430000 | 13.76210000 | -15.05590000 | H | -17.35350000 | 4.86770000  | 8.14170000   |
| H | -23.32830000 | 14.70180000 | -14.47730000 | H | -17.94490000 | 2.50430000  | 7.54430000   |
| H | -24.22570000 | 12.38240000 | -19.50160000 | H | -19.58360000 | 2.77000000  | 8.08090000   |
| H | -26.44270000 | 13.48670000 | -21.19800000 | H | -16.65170000 | -1.41190000 | 11.75230000  |
| H | -26.23000000 | 10.64380000 | -20.17250000 | H | -18.52900000 | -3.69810000 | 11.81410000  |
| H | -27.41080000 | 11.31220000 | -18.21840000 | H | -18.84630000 | -2.55190000 | 14.38760000  |
| H | -27.95440000 | 12.80860000 | -18.96510000 | H | -17.98890000 | -0.45560000 | 13.74740000  |
| H | -23.91600000 | 14.61530000 | -20.63900000 | H | -19.70630000 | -0.19140000 | 13.48780000  |
| H | -23.76310000 | 14.70380000 | -18.90740000 | H | -16.95340000 | -3.07800000 | 9.87120000   |
| H | -26.06840000 | 15.23710000 | -18.91370000 | H | -17.00090000 | -1.41560000 | 9.37800000   |
| H | -28.47760000 | 10.66630000 | -20.71240000 | H | -19.35030000 | -1.59160000 | 9.63450000   |
| H | -25.62770000 | 11.87370000 | -22.60860000 | H | -20.62000000 | -2.30570000 | 12.19570000  |
| H | -26.11440000 | 12.08730000 | -16.50950000 | H | -17.20570000 | -4.22820000 | 13.55370000  |
| H | -24.89100000 | 11.31170000 | -17.48790000 | H | -18.57000000 | 1.44870000  | 12.08390000  |
| H | -15.84310000 | 13.12180000 | 3.16880000   | H | -17.01420000 | 0.82750000  | 11.60990000  |
| H | -15.93740000 | 14.39230000 | 1.98520000   | H | -25.37480000 | 8.19710000  | -5.78600000  |
| H | -13.29070000 | 13.50290000 | 4.38680000   | H | -25.04350000 | 9.79460000  | -6.36430000  |
| H | -10.83650000 | 14.17370000 | 4.56050000   | H | -27.37780000 | 8.00110000  | -3.61850000  |
| H | -10.04420000 | 14.71810000 | 3.09430000   | H | -28.85070000 | 10.45150000 | -1.44680000  |
| H | -9.50340000  | 12.35330000 | 2.46850000   | H | -29.14280000 | 8.81040000  | -2.00290000  |
| H | -10.41220000 | 11.75190000 | 3.83530000   | H | -30.73310000 | 9.65500000  | -3.74410000  |
| H | -7.37480000  | 11.12760000 | 3.40640000   | H | -30.41760000 | 11.30810000 | -3.26740000  |
| H | -8.36080000  | 10.53710000 | 4.71460000   | H | -33.25340000 | 9.91790000  | -3.18120000  |
| H | -6.89140000  | 11.65350000 | 6.38200000   | H | -32.91180000 | 11.59270000 | -2.82560000  |
| H | -5.89120000  | 12.31060000 | 5.13420000   | H | -33.78160000 | 11.29860000 | -0.50170000  |
| H | -3.69680000  | 11.38100000 | 4.54020000   | H | -34.10690000 | 9.61180000  | -0.82520000  |
| H | -2.85790000  | 9.59030000  | 2.27230000   | H | -38.06370000 | 11.07700000 | -2.08810000  |
| H | -2.54360000  | 9.01000000  | 5.22900000   | H | -38.47220000 | 11.99030000 | 0.77260000   |
| H | -4.67340000  | 7.91030000  | 5.12740000   | H | -38.79960000 | 9.18340000  | -0.26910000  |
| H | -4.66810000  | 7.92410000  | 3.37340000   | H | -36.67080000 | 8.99870000  | -0.83820000  |
| H | -3.69900000  | 12.40300000 | 2.28870000   | H | -36.09280000 | 9.63130000  | 0.69400000   |
| H | -5.31450000  | 12.34090000 | 2.93160000   | H | -38.73440000 | 13.44940000 | -1.93200000  |
| H | -5.55190000  | 10.33290000 | 1.74510000   | H | -37.09350000 | 13.31410000 | -2.49190000  |
| H | -1.19690000  | 7.90260000  | 3.69580000   | H | -36.43120000 | 13.69110000 | -0.30030000  |
| H | -1.41350000  | 11.24600000 | 2.70950000   | H | -39.41760000 | 9.53720000  | 1.82360000   |
| H | -19.60680000 | 10.37450000 | 4.86710000   | H | -40.33270000 | 12.31830000 | -0.38390000  |
| H | -17.86290000 | 10.23410000 | 4.88510000   | H | -22.34640000 | 14.58180000 | -6.95220000  |
| H | -18.28700000 | 6.62730000  | 4.34330000   | H | -23.30060000 | 13.14890000 | -7.23640000  |
| H | -27.07360000 | 8.68590000  | 2.21110000   | H | -22.82560000 | 15.19460000 | -9.84710000  |
| H | -28.12510000 | 7.28040000  | 2.19210000   | H | -10.56120000 | 13.46440000 | -4.42690000  |
| H | -29.61040000 | 8.54390000  | 0.47900000   | H | -10.55700000 | 13.80000000 | -2.71550000  |
| H | -28.63580000 | 9.96220000  | 0.77900000   | H | -9.77310000  | 11.51590000 | -2.17910000  |
| H | -31.69080000 | 9.42920000  | 1.21160000   | H | -8.66980000  | 12.31790000 | -3.24900000  |
| H | -30.97450000 | 11.00240000 | 1.45190000   | H | -8.73450000  | 11.67100000 | -5.83250000  |
| H | -36.08220000 | 11.20600000 | 2.22000000   | H | -10.46660000 | 11.63120000 | -5.93960000  |
| H | -36.69280000 | 12.21110000 | 4.99280000   | H | -9.79550000  | 10.12110000 | -7.61010000  |
| H | -36.89620000 | 9.34370000  | 4.05770000   | H | -10.35230000 | 9.11360000  | -6.31850000  |
| H | -34.36030000 | 10.06580000 | 5.38140000   | H | -5.72500000  | 8.34330000  | -7.06500000  |
| H | -34.67990000 | 9.04720000  | 3.97880000   | H | -4.69630000  | 11.15560000 | -7.48620000  |
| H | -36.60590000 | 13.66200000 | 2.44320000   | H | -5.66350000  | 9.27440000  | -9.64160000  |
| H | -35.01070000 | 13.33880000 | 1.81330000   | H | -7.83110000  | 9.54010000  | -9.07870000  |
| H | -34.36240000 | 13.44500000 | 4.13810000   | H | -7.63420000  | 11.22830000 | -8.61080000  |
| H | -37.73930000 | 10.12930000 | 6.13190000   | H | -4.26080000  | 9.33230000  | -5.23060000  |
| H | -38.24340000 | 10.85830000 | 3.00260000   | H | -5.87170000  | 8.90960000  | -4.70410000  |
| H | -21.56110000 | 6.08990000  | 3.28420000   | H | -6.40270000  | 11.17260000 | -5.25740000  |
| H | -22.93370000 | 6.55520000  | 2.33940000   | H | -4.50560000  | 11.31120000 | -10.07450000 |
| H | -21.57260000 | 7.12840000  | 5.94090000   | H | -3.74550000  | 8.60830000  | -8.39060000  |
| H | -22.14300000 | 10.27910000 | 7.31510000   | H | -18.16420000 | 16.25430000 | -5.62770000  |
| H | -21.98430000 | 8.62620000  | 7.83870000   | H | -19.87040000 | 16.30150000 | -5.31750000  |
| H | -23.72660000 | 9.30300000  | 9.19100000   | H | -17.56930000 | 15.28700000 | -8.56510000  |
| H | -24.62250000 | 8.54250000  | 7.91160000   | H | -19.47320000 | 16.33130000 | -11.60770000 |
| H | -25.48520000 | 10.63610000 | 9.97940000   | H | -17.89630000 | 15.74230000 | -11.09410000 |
| H | -26.68110000 | 10.16080000 | 8.80230000   | H | -17.30190000 | 18.08090000 | -10.30260000 |
| H | -29.43030000 | 14.04390000 | 9.69140000   | H | -18.84750000 | 18.66470000 | -10.86210000 |
| H | -28.79050000 | 16.81680000 | 10.41840000  | H | -16.09350000 | 19.72040000 | -11.71360000 |
| H | -28.95560000 | 15.73580000 | 12.98920000  | H | -17.61010000 | 20.36660000 | -12.28360000 |
| H | -28.80600000 | 13.48730000 | 12.23980000  | H | -16.93700000 | 19.89660000 | -14.64120000 |
| H | -27.13940000 | 13.82170000 | 12.69050000  | H | -15.42360000 | 19.21360000 | -14.08420000 |
| H | -28.89210000 | 15.88360000 | 8.05280000   | H | -16.61090000 | 21.85100000 | -16.01840000 |
| H | -28.02030000 | 14.40990000 | 7.76340000   | H | -14.34870000 | 22.87490000 | -17.68270000 |
| H | -26.28600000 | 15.33150000 | 9.01890000   | H | -15.49660000 | 24.32370000 | -15.28040000 |
| H | -26.55980000 | 16.17800000 | 11.55120000  | H | -13.84410000 | 23.20710000 | -13.92370000 |
| H | -30.73560000 | 16.57860000 | 11.49760000  | H | -12.97660000 | 22.65000000 | -15.34630000 |
| H | -24.01160000 | 5.61560000  | -1.49790000  | H | -16.01270000 | 20.66940000 | -18.14240000 |

|                         |              |             |              |                                   |
|-------------------------|--------------|-------------|--------------|-----------------------------------|
| H                       | -15.90800000 | 19.63520000 | -16.74030000 | 34 37 1.0                         |
| H                       | -13.62970000 | 20.20210000 | -16.68210000 | 35 36 1.0                         |
| H                       | -13.49820000 | 25.46400000 | -15.47220000 | 36 87 1.0 252 1.0 253 1.0         |
| H                       | -15.89660000 | 24.53410000 | -18.02560000 | 37 167 1.0 330 1.0 331 1.0        |
| H                       | -23.39600000 | 13.25820000 | -17.21910000 | 38 186 1.0 351 1.0 352 1.0        |
| H                       | -24.68960000 | 14.21660000 | -16.52540000 | 39                                |
| H                       | -17.88480000 | 0.55230000  | 9.25430000   | 40                                |
| H                       | -19.49490000 | 0.95020000  | 9.79520000   | 41                                |
| H                       | -18.71440000 | 3.24790000  | 10.41330000  | 42                                |
| H                       | -17.10340000 | 2.85790000  | 9.86680000   | 43                                |
| H                       | -24.77640000 | 12.62860000 | -14.57190000 | 44                                |
| H                       | -23.43400000 | 11.73920000 | -15.24460000 | 45                                |
| H                       | -19.92510000 | 4.65650000  | 6.46080000   | 46                                |
| H                       | -18.29180000 | 4.52690000  | 5.83470000   | 47                                |
| H                       | -22.08970000 | 15.25170000 | -12.29480000 | 48                                |
| H                       | -20.68640000 | 14.28110000 | -12.72200000 | 49                                |
| H                       | -8.82890000  | 12.93240000 | 5.39860000   | 50                                |
| H                       | -7.89790000  | 13.48540000 | 4.03000000   | 51                                |
| H                       | -6.30560000  | 9.35490000  | 5.76360000   | 52                                |
| H                       | -4.89400000  | 10.27690000 | 6.21930000   | 53                                |
| H                       | -10.61790000 | 10.09200000 | -3.99210000  | 54                                |
| H                       | -8.88810000  | 9.99710000  | -3.89380000  | 55                                |
| H                       | -8.28560000  | 8.14010000  | -7.20960000  | 56                                |
| H                       | -7.99250000  | 8.71460000  | -5.58850000  | 57                                |
| H                       | -18.22170000 | 18.11310000 | -13.21800000 | 58                                |
| H                       | -16.69040000 | 17.47110000 | -12.67230000 | 59                                |
| H                       | -14.87710000 | 21.42330000 | -12.98470000 | 60                                |
| H                       | -16.30000000 | 22.13470000 | -13.70770000 | 61                                |
| H                       | -29.38090000 | 10.02610000 | 3.13210000   | 62                                |
| H                       | -30.16190000 | 8.47170000  | 2.96640000   | 63 68 1.0                         |
| H                       | -25.17630000 | 10.78180000 | 6.94200000   | 64 205 1.0                        |
| H                       | -24.06650000 | 11.55100000 | 8.04430000   | 65 148 1.0                        |
| H                       | -31.33320000 | 10.85660000 | -0.99490000  | 66 127 1.0                        |
| H                       | -31.63700000 | 9.19140000  | -1.42350000  | 67 106 1.0                        |
| H                       | -35.77060000 | 10.26710000 | -2.59970000  | 68 69 1.0 233 1.0 234 1.0         |
| H                       | -35.34170000 | 11.94190000 | -2.35790000  | 69 70 1.5 73 1.5                  |
| H                       | -33.39200000 | 11.70720000 | 1.93100000   | 70 71 1.5 235 1.0                 |
| H                       | -33.99500000 | 10.06890000 | 1.87260000   | 71 72 1.5 191 1.0                 |
| H                       | -31.80450000 | 11.07720000 | 3.77770000   | 72 73 1.5                         |
| H                       | -32.35590000 | 9.42190000  | 3.67110000   | 73                                |
| H                       | -26.96800000 | 12.52770000 | 8.10850000   | 74 75 1.0 188 1.0 403 1.0 404 1.0 |
| H                       | -25.63510000 | 13.01480000 | 9.12820000   | 75 76 1.0 236 1.0 237 1.0         |
| H                       | -28.38650000 | 12.03790000 | 10.06780000  | 76 225 1.0 238 1.0 239 1.0        |
| H                       | -26.98320000 | 11.99220000 | 11.09810000  | 77 78 1.0 226 1.0 250 1.0 251 1.0 |
| 1 2 1.5 6 1.5 7 1.0     |              |             |              | 78 79 1.0 82 1.0                  |
| 2 3 1.5 63 1.0          |              |             |              | 79 80 1.0 83 1.0 240 1.0          |
| 3 4 1.5 31 1.0          |              |             |              | 80 81 1.0 86 1.0 241 1.0          |
| 4 5 1.5 39 1.0          |              |             |              | 81 82 1.0 85 1.0 242 1.0          |
| 5 6 1.5 8 1.0           |              |             |              | 82 243 1.0 244 1.0                |
| 6 64 1.0                |              |             |              | 83 84 1.0 245 1.0 246 1.0         |
| 7 40 1.0 41 1.0 42 1.0  |              |             |              | 84 247 1.0                        |
| 8 11 1.0 43 1.0 44 1.0  |              |             |              | 85 248 1.0                        |
| 9 10 1.5 14 1.5 15 1.0  |              |             |              | 86 249 1.0                        |
| 10 11 1.5 33 1.0        |              |             |              | 87 88 1.5 91 1.5                  |
| 11 12 1.5               |              |             |              | 88 89 1.5 254 1.0                 |
| 12 13 1.5 45 1.0        |              |             |              | 89 90 1.5 92 1.0                  |
| 13 14 1.5 22 1.0        |              |             |              | 90 91 1.5                         |
| 14 34 1.0               |              |             |              | 91                                |
| 15 46 1.0 47 1.0 48 1.0 |              |             |              | 92 93 1.0 255 1.0 256 1.0         |
| 16 17 1.5 21 1.5 23 1.0 |              |             |              | 93 94 1.0 257 1.0 258 1.0         |
| 17 18 1.5 65 1.0        |              |             |              | 94 95 1.0 405 1.0 406 1.0         |
| 18 19 1.5 22 1.0        |              |             |              | 95 96 1.0 259 1.0 260 1.0         |
| 19 20 1.5 49 1.0        |              |             |              | 96 232 1.0 261 1.0 262 1.0        |
| 20 21 1.5 32 1.0        |              |             |              | 97 98 1.0 101 1.0 232 1.0         |
| 21 66 1.0               |              |             |              | 98 99 1.0 102 1.0 263 1.0         |
| 22 50 1.0 51 1.0        |              |             |              | 99 100 1.0 105 1.0 264 1.0        |
| 23 52 1.0 53 1.0 54 1.0 |              |             |              | 100 101 1.0 104 1.0 265 1.0       |
| 24 25 1.5 29 1.5 30 1.0 |              |             |              | 101 266 1.0 267 1.0               |
| 25 26 1.5 67 1.0        |              |             |              | 102 103 1.0 268 1.0 269 1.0       |
| 26 27 1.5 32 1.0        |              |             |              | 103 270 1.0                       |
| 27 28 1.5 55 1.0        |              |             |              | 104 271 1.0                       |
| 28 29 1.5 31 1.0        |              |             |              | 105 272 1.0                       |
| 29 35 1.0               |              |             |              | 106 107 1.0 273 1.0 274 1.0       |
| 30 56 1.0 57 1.0 58 1.0 |              |             |              | 107 108 1.5 111 1.5               |
| 31 59 1.0 60 1.0        |              |             |              | 108 109 1.5 275 1.0               |
| 32 61 1.0 62 1.0        |              |             |              | 109 110 1.5 154 1.0               |
| 33 38 1.0               |              |             |              | 110 111 1.5                       |

111  
112 113 1.0 151 1.0 276 1.0 277 1.0  
113 114 1.0 278 1.0 279 1.0  
114 115 1.0 417 1.0 418 1.0  
115 116 1.0 280 1.0 281 1.0  
116 117 1.0 427 1.0 428 1.0  
117 118 1.0 425 1.0 426 1.0  
118 119 1.0 122 1.0  
119 120 1.0 123 1.0 282 1.0  
120 121 1.0 126 1.0 283 1.0  
121 122 1.0 125 1.0 284 1.0  
122 285 1.0 286 1.0  
123 124 1.0 287 1.0 288 1.0  
124 289 1.0  
125 290 1.0  
126 291 1.0  
127 128 1.0 292 1.0 293 1.0  
128 129 1.5 132 1.5  
129 130 1.5 294 1.0  
130 131 1.5 133 1.0  
131 132 1.5  
132  
133 134 1.0 295 1.0 296 1.0  
134 135 1.0 297 1.0 298 1.0  
135 136 1.0 419 1.0 420 1.0  
136 137 1.0 299 1.0 300 1.0  
137 138 1.0 429 1.0 430 1.0  
138 139 1.0 431 1.0 432 1.0  
139 140 1.0 143 1.0  
140 141 1.0 144 1.0 301 1.0  
141 142 1.0 147 1.0 302 1.0  
142 143 1.0 146 1.0 303 1.0  
143 304 1.0 305 1.0  
144 145 1.0 306 1.0 307 1.0  
145 308 1.0  
146 309 1.0  
147 310 1.0  
148 149 1.0 311 1.0 312 1.0  
149 150 1.5 153 1.5  
150 151 1.5 313 1.0  
151 152 1.5  
152 153 1.5  
153  
154 155 1.0 401 1.0 402 1.0  
155 156 1.0 314 1.0 315 1.0  
156 229 1.0 316 1.0 317 1.0  
157 158 1.0 230 1.0 328 1.0 329 1.0  
158 159 1.0 162 1.0  
159 160 1.0 163 1.0 318 1.0  
160 161 1.0 166 1.0 319 1.0  
161 162 1.0 165 1.0 320 1.0  
162 321 1.0 322 1.0  
163 164 1.0 323 1.0 324 1.0  
164 325 1.0  
165 326 1.0  
166 327 1.0  
167 168 1.5 171 1.5  
168 169 1.5 332 1.0  
169 170 1.5 172 1.0  
170 171 1.5  
171  
172 173 1.0 333 1.0 334 1.0  
173 174 1.0 335 1.0 336 1.0  
174 175 1.0 421 1.0 422 1.0  
175 176 1.0 337 1.0 338 1.0  
176 231 1.0 339 1.0 340 1.0  
177 178 1.0 181 1.0 231 1.0  
178 179 1.0 182 1.0 341 1.0  
179 180 1.0 185 1.0 342 1.0  
180 181 1.0 184 1.0 343 1.0  
181 344 1.0 345 1.0  
182 183 1.0 346 1.0 347 1.0  
183 348 1.0  
184 349 1.0  
185 350 1.0  
186 187 1.5 190 1.5  
187 188 1.5 353 1.0

188 189 1.5  
189 190 1.5  
190  
191 192 1.0 354 1.0 355 1.0  
192 193 1.0 356 1.0 357 1.0  
193 194 1.0 409 1.0 410 1.0  
194 195 1.0 358 1.0 359 1.0  
195 228 1.0 360 1.0 361 1.0  
196 197 1.0 200 1.0 228 1.0  
197 198 1.0 201 1.0 362 1.0  
198 199 1.0 204 1.0 363 1.0  
199 200 1.0 203 1.0 364 1.0  
200 365 1.0 366 1.0  
201 202 1.0 367 1.0 368 1.0  
202 369 1.0  
203 370 1.0  
204 371 1.0  
205 206 1.0 372 1.0 373 1.0  
206 207 1.5 210 1.5  
207 208 1.5 374 1.0  
208 209 1.5 211 1.0  
209 210 1.5  
210  
211 212 1.0 375 1.0 376 1.0  
212 213 1.0 377 1.0 378 1.0  
213 214 1.0 413 1.0 414 1.0  
214 215 1.0 379 1.0 380 1.0  
215 227 1.0 381 1.0 382 1.0  
216 217 1.0 220 1.0 227 1.0  
217 218 1.0 221 1.0 383 1.0  
218 219 1.0 224 1.0 384 1.0  
219 220 1.0 223 1.0 385 1.0  
220 386 1.0 387 1.0  
221 222 1.0 388 1.0 389 1.0  
222 390 1.0  
223 391 1.0  
224 392 1.0  
225 226 1.0 399 1.0 400 1.0  
226 393 1.0 394 1.0  
227 415 1.0 416 1.0  
228 411 1.0 412 1.0  
229 230 1.0 397 1.0 398 1.0  
230 395 1.0 396 1.0  
231 423 1.0 424 1.0  
232 407 1.0 408 1.0  
233  
234  
235  
236  
237  
238  
239  
240  
241  
242  
243  
244  
245  
246  
247  
248  
249  
250  
251  
252  
253  
254  
255  
256  
257  
258  
259  
260  
261  
262  
263  
264

|     |     |
|-----|-----|
| 265 | 342 |
| 266 | 343 |
| 267 | 344 |
| 268 | 345 |
| 269 | 346 |
| 270 | 347 |
| 271 | 348 |
| 272 | 349 |
| 273 | 350 |
| 274 | 351 |
| 275 | 352 |
| 276 | 353 |
| 277 | 354 |
| 278 | 355 |
| 279 | 356 |
| 280 | 357 |
| 281 | 358 |
| 282 | 359 |
| 283 | 360 |
| 284 | 361 |
| 285 | 362 |
| 286 | 363 |
| 287 | 364 |
| 288 | 365 |
| 289 | 366 |
| 290 | 367 |
| 291 | 368 |
| 292 | 369 |
| 293 | 370 |
| 294 | 371 |
| 295 | 372 |
| 296 | 373 |
| 297 | 374 |
| 298 | 375 |
| 299 | 376 |
| 300 | 377 |
| 301 | 378 |
| 302 | 379 |
| 303 | 380 |
| 304 | 381 |
| 305 | 382 |
| 306 | 383 |
| 307 | 384 |
| 308 | 385 |
| 309 | 386 |
| 310 | 387 |
| 311 | 388 |
| 312 | 389 |
| 313 | 390 |
| 314 | 391 |
| 315 | 392 |
| 316 | 393 |
| 317 | 394 |
| 318 | 395 |
| 319 | 396 |
| 320 | 397 |
| 321 | 398 |
| 322 | 399 |
| 323 | 400 |
| 324 | 401 |
| 325 | 402 |
| 326 | 403 |
| 327 | 404 |
| 328 | 405 |
| 329 | 406 |
| 330 | 407 |
| 331 | 408 |
| 332 | 409 |
| 333 | 410 |
| 334 | 411 |
| 335 | 412 |
| 336 | 413 |
| 337 | 414 |
| 338 | 415 |
| 339 | 416 |
| 340 | 417 |
| 341 | 418 |

419  
420  
421  
422  
423  
424  
425

426  
427  
428  
429  
430  
431  
432

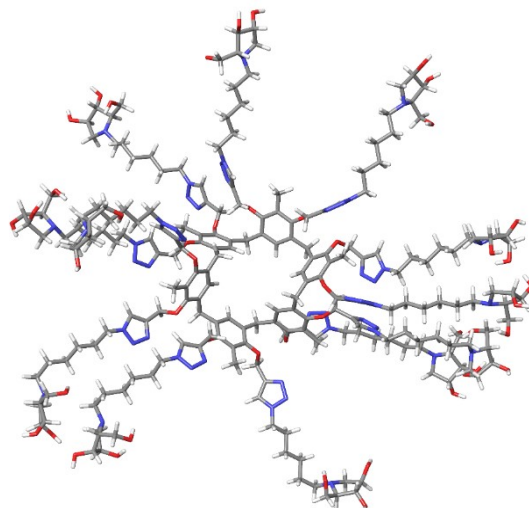

Figure S32: Lowest energy structure of 5a

|   |             |             |             |   |             |             |             |
|---|-------------|-------------|-------------|---|-------------|-------------|-------------|
| C | 2.57250000  | -4.60620000 | 10.28050000 | H | 4.46820000  | -4.90870000 | 18.78670000 |
| C | 2.15600000  | -5.39790000 | 11.36390000 | C | 4.07470000  | -3.43680000 | 20.29760000 |
| C | 3.07260000  | -5.73880000 | 12.37470000 | C | 4.62290000  | -2.41300000 | 21.08290000 |
| C | 4.39330000  | -5.28810000 | 12.28700000 | C | 7.11790000  | -4.60460000 | 18.30590000 |
| H | 5.11090000  | -5.57890000 | 13.04260000 | H | 6.49920000  | -5.27680000 | 17.71070000 |
| C | 4.81420000  | -4.49280000 | 11.22010000 | H | 7.78140000  | -5.25370000 | 18.87360000 |
| C | 3.89060000  | -4.12180000 | 10.23210000 | C | 6.61450000  | -1.07290000 | 21.93370000 |
| C | 1.61010000  | -4.31810000 | 9.13100000  | H | 7.58040000  | -1.38600000 | 22.32730000 |
| H | 0.93650000  | -5.15920000 | 8.96010000  | H | 5.98460000  | -0.83920000 | 22.79270000 |
| H | 2.14120000  | -4.14630000 | 8.19400000  | H | 6.76700000  | -0.15550000 | 21.36460000 |
| H | 1.00810000  | -3.43600000 | 9.34780000  | C | -0.30660000 | -1.57250000 | 19.57730000 |
| C | 6.29700000  | -4.14160000 | 11.08830000 | C | 0.62940000  | -2.29260000 | 20.33290000 |
| H | 6.89950000  | -4.85030000 | 11.66030000 | C | 1.57780000  | -3.10560000 | 19.69520000 |
| H | 6.58380000  | -4.30940000 | 10.05070000 | C | 1.52060000  | -3.26430000 | 18.30920000 |
| C | 7.22100000  | -0.41780000 | 11.06240000 | H | 2.22610000  | -3.91980000 | 17.81800000 |
| C | 7.02390000  | -1.73550000 | 10.62260000 | C | 0.53800000  | -2.61780000 | 17.55280000 |
| C | 6.66360000  | -2.73130000 | 11.54240000 | C | -0.36130000 | -1.74520000 | 18.18510000 |
| C | 6.67000000  | -2.43870000 | 12.90710000 | C | -1.27160000 | -0.61850000 | 20.27550000 |
| H | 6.43790000  | -3.21750000 | 13.62000000 | H | -2.15280000 | -1.16180000 | 20.61660000 |
| C | 7.00310000  | -1.16180000 | 13.36670000 | H | -1.59620000 | 0.18420000  | 19.61210000 |
| C | 7.25950000  | -0.14200000 | 12.43540000 | H | -0.80340000 | -0.14650000 | 21.13960000 |
| C | 7.40520000  | 0.72280000  | 10.06690000 | C | 0.44790000  | -2.89410000 | 16.05230000 |
| H | 8.43560000  | 1.07430000  | 10.07440000 | H | -0.44490000 | -2.44270000 | 15.62290000 |
| H | 6.76320000  | 1.56200000  | 10.33870000 | H | 1.27920000  | -2.37020000 | 15.57920000 |
| H | 7.14020000  | 0.43540000  | 9.04940000  | C | -0.61120000 | -6.56120000 | 15.51330000 |
| C | 7.07500000  | -0.90610000 | 14.87300000 | C | -0.60300000 | -5.23790000 | 15.99170000 |
| H | 7.49680000  | 0.07460000  | 15.08710000 | C | 0.45020000  | -4.37300000 | 15.64640000 |
| H | 6.05060000  | -0.85350000 | 15.24340000 | C | 1.50630000  | -4.85450000 | 14.86940000 |
| C | 9.98590000  | -2.88440000 | 16.42160000 | H | 2.31980000  | -4.19370000 | 14.59920000 |
| C | 9.27020000  | -2.00140000 | 15.59450000 | C | 1.52100000  | -6.17450000 | 14.41150000 |
| C | 7.87180000  | -1.93970000 | 15.67550000 | C | 0.45770000  | -7.03210000 | 14.73650000 |
| C | 7.19710000  | -2.79360000 | 16.55150000 | C | -1.77910000 | -7.49950000 | 15.80990000 |
| H | 6.12180000  | -2.72770000 | 16.64370000 | H | -1.46670000 | -8.27500000 | 16.51000000 |
| C | 7.89450000  | -3.72050000 | 17.33050000 | H | -2.12090000 | -7.98830000 | 14.89870000 |
| C | 9.29360000  | -3.79070000 | 17.23680000 | H | -2.64300000 | -6.98310000 | 16.22590000 |
| C | 11.51180000 | -2.83590000 | 16.45660000 | C | 2.68810000  | -6.64870000 | 13.54480000 |
| H | 11.90270000 | -3.19110000 | 17.41060000 | H | 2.51170000  | -7.64020000 | 13.13570000 |
| H | 11.87000000 | -1.81360000 | 16.33210000 | H | 3.53890000  | -6.77800000 | 14.21490000 |
| H | 11.93940000 | -3.44490000 | 15.66150000 | C | 2.62600000  | -3.88060000 | 20.49260000 |
| C | 6.00000000  | -2.14580000 | 21.03670000 | H | 2.53330000  | -4.93570000 | 20.23110000 |
| C | 6.82010000  | -2.87570000 | 20.16580000 | H | 2.41100000  | -3.84670000 | 21.56020000 |
| C | 6.25950000  | -3.84310000 | 19.31490000 | O | 0.87120000  | -5.89370000 | 11.40160000 |
| C | 4.89440000  | -4.13080000 | 19.40460000 | O | 4.29830000  | -3.32210000 | 9.19240000  |

|   |              |              |             |   |              |              |             |
|---|--------------|--------------|-------------|---|--------------|--------------|-------------|
| O | 7.19170000   | -2.04200000  | 9.29060000  | H | -7.81210000  | -10.92570000 | 13.90510000 |
| O | 7.58320000   | 1.13050000   | 12.84460000 | H | -7.27120000  | -12.29720000 | 14.83000000 |
| O | 9.92930000   | -1.17510000  | 14.71510000 | H | -9.19420000  | -12.46170000 | 12.45680000 |
| O | 10.00180000  | -4.72600000  | 17.95950000 | H | -9.69700000  | -12.35250000 | 14.11830000 |
| O | 8.17310000   | -2.62860000  | 20.15910000 | N | -10.13190000 | -14.88080000 | 13.45000000 |
| O | 3.80980000   | -1.70480000  | 21.93090000 | C | -10.39810000 | -15.41830000 | 12.10260000 |
| O | 0.61290000   | -2.18690000  | 21.70250000 | C | -11.59890000 | -16.36220000 | 12.30110000 |
| O | -1.29310000  | -1.05160000  | 17.44530000 | C | -11.27970000 | -17.02500000 | 13.65280000 |
| O | -1.63710000  | -4.77200000  | 16.77070000 | C | -10.36570000 | -16.00760000 | 14.36170000 |
| O | 0.46290000   | -8.34750000  | 14.32850000 | C | -10.62500000 | -14.36400000 | 10.99180000 |
| C | -0.15920000  | -4.95810000  | 11.74860000 | O | -11.63080000 | -13.43920000 | 11.37040000 |
| C | -1.43490000  | -5.21570000  | 10.95820000 | O | -12.42590000 | -17.44030000 | 14.40410000 |
| C | -2.34750000  | -4.30350000  | 10.43940000 | O | -11.79300000 | -17.29800000 | 11.24390000 |
| N | -3.34100000  | -5.05950000  | 9.87630000  | H | -9.55020000  | -16.03910000 | 11.80290000 |
| N | -3.05540000  | -6.35910000  | 9.97900000  | H | -12.49260000 | -15.74370000 | 12.41780000 |
| N | -1.86010000  | -6.43940000  | 10.67170000 | H | -10.67080000 | -17.91130000 | 13.46080000 |
| C | -4.57300000  | -4.61710000  | 9.23540000  | H | -9.43270000  | -16.50290000 | 14.63930000 |
| C | -4.40960000  | -4.45480000  | 7.70890000  | H | -10.82490000 | -15.63140000 | 15.27760000 |
| C | -5.73710000  | -4.06820000  | 7.02770000  | H | -10.91430000 | -14.85160000 | 10.05930000 |
| C | -5.59110000  | -3.73550000  | 5.53160000  | H | -9.69650000  | -13.83650000 | 10.77440000 |
| C | -6.94610000  | -3.44000000  | 4.85560000  | H | -11.47280000 | -13.23610000 | 12.30080000 |
| C | -6.80320000  | -3.00290000  | 3.38420000  | H | -12.88500000 | -18.10350000 | 13.93200000 |
| H | 0.15910000   | -3.92190000  | 11.61710000 | H | -12.72910000 | -17.51130000 | 11.19420000 |
| H | -0.38210000  | -5.05970000  | 12.80820000 | H | -8.46910000  | -14.44350000 | 14.66640000 |
| H | -2.39520000  | -3.22730000  | 10.44860000 | H | -8.06510000  | -14.70080000 | 12.99310000 |
| H | -4.87090000  | -3.67280000  | 9.69240000  | C | -1.61580000  | -5.21590000  | 18.13280000 |
| H | -5.35570000  | -5.34180000  | 9.46760000  | C | -2.88990000  | -4.77710000  | 18.82670000 |
| H | -4.03590000  | -5.38340000  | 7.27170000  | C | -4.17830000  | -4.63650000  | 18.32520000 |
| H | -3.65610000  | -3.69200000  | 7.50330000  | N | -4.93490000  | -4.19080000  | 19.37650000 |
| H | -6.17350000  | -3.20820000  | 7.53880000  | N | -4.18240000  | -4.08560000  | 20.47570000 |
| H | -6.45210000  | -4.88390000  | 7.15040000  | N | -2.90050000  | -4.45300000  | 20.11010000 |
| H | -5.10360000  | -4.56560000  | 5.01730000  | C | -6.36760000  | -3.90180000  | 19.40060000 |
| H | -4.92980000  | -2.87480000  | 5.41760000  | C | -6.73050000  | -2.66050000  | 20.25250000 |
| H | -7.45930000  | -2.67230000  | 5.42990000  | C | -8.22690000  | -2.30200000  | 20.17350000 |
| H | -7.56960000  | -4.33450000  | 4.91080000  | C | -8.66720000  | -1.31520000  | 21.27080000 |
| N | -8.08260000  | -3.01490000  | 2.66080000  | C | -10.16270000 | -0.95310000  | 21.19130000 |
| C | -8.92660000  | -1.80540000  | 2.77150000  | C | -10.65750000 | -0.20020000  | 22.44080000 |
| C | -9.87710000  | -1.88460000  | 1.56140000  | H | -0.74120000  | -4.80710000  | 18.63790000 |
| C | -8.96840000  | -2.44020000  | 0.45390000  | H | -1.51490000  | -6.29880000  | 18.20670000 |
| C | -7.88850000  | -3.22490000  | 1.22040000  | H | -4.59820000  | -4.80440000  | 17.34740000 |
| C | -9.68450000  | -1.61880000  | 4.11090000  | H | -6.86930000  | -4.78940000  | 19.78860000 |
| O | -10.31530000 | -2.82570000  | 4.50450000  | H | -6.70230000  | -3.77080000  | 18.37120000 |
| O | -9.66380000  | -3.18260000  | -0.54010000 | H | -6.13340000  | -1.79820000  | 19.94930000 |
| O | -10.48520000 | -0.64900000  | 1.20370000  | H | -6.46560000  | -2.85970000  | 21.29310000 |
| H | -8.29590000  | -0.92610000  | 2.62030000  | H | -8.82220000  | -3.21260000  | 20.26650000 |
| H | -10.64900000 | -2.62430000  | 1.78680000  | H | -8.45390000  | -1.88920000  | 19.18880000 |
| H | -8.47020000  | -1.59260000  | -0.02220000 | H | -8.06900000  | -0.40360000  | 21.21450000 |
| H | -6.90430000  | -2.88640000  | 0.89020000  | H | -8.45430000  | -1.75640000  | 22.24660000 |
| H | -7.95680000  | -4.29480000  | 1.02000000  | H | -10.74760000 | -1.86530000  | 21.07070000 |
| H | -10.43350000 | -0.82940000  | 4.02020000  | H | -10.33580000 | -0.34990000  | 20.29850000 |
| H | -9.00710000  | -1.28280000  | 4.89400000  | N | -12.00150000 | 0.35680000   | 22.26910000 |
| H | -9.74140000  | -3.53680000  | 4.19180000  | C | -13.11430000 | -0.58580000  | 22.02000000 |
| H | -9.03770000  | -3.51490000  | -1.18900000 | C | -14.29270000 | -0.16500000  | 22.94280000 |
| H | -11.07120000 | -0.82820000  | 0.46060000  | C | -13.94290000 | 1.28650000   | 23.31870000 |
| H | -6.12710000  | -3.71760000  | 2.90870000  | C | -12.41380000 | 1.20240000   | 23.39370000 |
| H | -6.31240000  | -2.03040000  | 3.30560000  | C | -13.51570000 | -0.62090000  | 20.52320000 |
| C | -0.01860000  | -8.60250000  | 13.00280000 | O | -13.77310000 | 0.68890000   | 20.03680000 |
| C | -1.07210000  | -9.69580000  | 12.99520000 | O | -14.38300000 | 2.23730000   | 22.35540000 |
| C | -2.24570000  | -9.77820000  | 12.25610000 | O | -14.41720000 | -1.02840000  | 24.07140000 |
| N | -2.81830000  | -10.96740000 | 12.61880000 | H | -12.81580000 | -1.59800000  | 22.30090000 |
| N | -2.07840000  | -11.58130000 | 13.54400000 | H | -15.25040000 | -0.18930000  | 22.41810000 |
| N | -0.97910000  | -10.77140000 | 13.76350000 | H | -14.37350000 | 1.55090000   | 24.28620000 |
| C | -4.06160000  | -11.56740000 | 12.15440000 | H | -12.13280000 | 0.74200000   | 24.34310000 |
| C | -5.16530000  | -11.47510000 | 13.22950000 | H | -11.94740000 | 2.18770000   | 23.37620000 |
| C | -6.45940000  | -12.19890000 | 12.81750000 | H | -14.39830000 | -1.24690000  | 20.37910000 |
| C | -7.59860000  | -11.99370000 | 13.83370000 | H | -12.72440000 | -1.07350000  | 19.92510000 |
| C | -8.90310000  | -12.72950000 | 13.47110000 | H | -12.93410000 | 1.16330000   | 20.09400000 |
| C | -8.81800000  | -14.25800000 | 13.64770000 | H | -14.31530000 | 1.81700000   | 21.48230000 |
| H | 0.81860000   | -8.90050000  | 12.37240000 | H | -13.59680000 | -1.01690000  | 24.57050000 |
| H | -0.43620000  | -7.70760000  | 12.54490000 | H | -9.97010000  | 0.62440000   | 22.64410000 |
| H | -2.69490000  | -9.12520000  | 11.52430000 | H | -10.62060000 | -0.85500000  | 23.31400000 |
| H | -3.85230000  | -12.60670000 | 11.89530000 | C | -2.59550000  | -1.63700000  | 17.42290000 |
| H | -4.36800000  | -11.06290000 | 11.23730000 | C | -3.68880000  | -0.61520000  | 17.16000000 |
| H | -5.38130000  | -10.42440000 | 13.43200000 | C | -5.06470000  | -0.80010000  | 17.20730000 |
| H | -4.80630000  | -11.90010000 | 14.16960000 | N | -5.60880000  | 0.41610000   | 16.89890000 |
| H | -6.24940000  | -13.26320000 | 12.70070000 | N | -4.65050000  | 1.31900000   | 16.69430000 |
| H | -6.78370000  | -11.84380000 | 11.83770000 | N | -3.44820000  | 0.65070000   | 16.85160000 |

|   |              |             |             |   |             |             |             |
|---|--------------|-------------|-------------|---|-------------|-------------|-------------|
| C | -7.01430000  | 0.78310000  | 16.81280000 | H | -3.95230000 | -2.85820000 | 34.47350000 |
| C | -7.48740000  | 1.51690000  | 18.08470000 | H | -2.50090000 | -2.94590000 | 33.48160000 |
| C | -8.98160000  | 1.87670000  | 18.01800000 | H | -4.20860000 | 2.06780000  | 33.38940000 |
| C | -9.49830000  | 2.57820000  | 19.28610000 | H | -5.23020000 | 1.11890000  | 32.34950000 |
| C | -10.99760000 | 2.92730000  | 19.18710000 | H | -3.15310000 | 0.33160000  | 31.43640000 |
| C | -11.59960000 | 3.52410000  | 20.47480000 | H | -0.58630000 | -0.86440000 | 35.20260000 |
| H | -2.81470000  | -2.12040000 | 18.37420000 | H | -3.52040000 | 0.52100000  | 36.37560000 |
| H | -2.61350000  | -2.40700000 | 16.65280000 | H | -4.86740000 | -3.04890000 | 32.32870000 |
| H | -5.68370000  | -1.65240000 | 17.42280000 | H | -5.86900000 | -1.74600000 | 32.90260000 |
| H | -7.59420000  | -0.12680000 | 16.65460000 | C | 3.45250000  | -0.40130000 | 21.46680000 |
| H | -7.14860000  | 1.40720000  | 15.92740000 | C | 3.00040000  | 0.42650000  | 22.64830000 |
| H | -6.90070000  | 2.42770000  | 18.22460000 | C | 1.76040000  | 0.28540000  | 23.26100000 |
| H | -7.30210000  | 0.89360000  | 18.96170000 | N | 1.91260000  | 1.33490000  | 24.31430000 |
| H | -9.56560000  | 0.97090000  | 17.84580000 | N | 3.15220000  | 1.83100000  | 24.34110000 |
| H | -9.15910000  | 2.52060000  | 17.15400000 | N | 3.82170000  | 1.25790000  | 23.27360000 |
| H | -8.92030000  | 3.48660000  | 19.46480000 | C | 0.94870000  | 1.66900000  | 25.35270000 |
| H | -9.32850000  | 1.93990000  | 20.15480000 | C | 1.30540000  | 0.95510000  | 26.67270000 |
| H | -11.54850000 | 2.01690000  | 18.95180000 | C | 0.21720000  | 1.08600000  | 27.75290000 |
| H | -11.16740000 | 3.58280000  | 18.33610000 | C | 0.52980000  | 0.21690000  | 28.98160000 |
| N | -10.97910000 | 4.79440000  | 20.86980000 | C | -0.54780000 | 0.28540000  | 30.08230000 |
| C | -11.60880000 | 6.01840000  | 20.33430000 | C | -0.26410000 | -0.64780000 | 31.27730000 |
| C | -11.08860000 | 7.14110000  | 21.25100000 | H | 2.65930000  | -0.48390000 | 20.72500000 |
| C | -11.14620000 | 6.47590000  | 22.63530000 | H | 4.28070000  | 0.09330000  | 20.95540000 |
| C | -10.99560000 | 4.97520000  | 22.32810000 | H | 0.83610000  | -0.04460000 | 23.08610000 |
| C | -11.37210000 | 6.30470000  | 18.83150000 | H | -0.03760000 | 1.36010000  | 25.00470000 |
| O | -9.99400000  | 6.21450000  | 18.51430000 | H | 0.92950000  | 2.75270000  | 25.47480000 |
| O | -10.20680000 | 6.98310000  | 23.57490000 | H | 2.25240000  | 1.33990000  | 27.05670000 |
| O | -11.82590000 | 8.35890000  | 21.18010000 | H | 1.47460000  | -0.10460000 | 26.46840000 |
| H | -12.68840000 | 5.95350000  | 20.49230000 | H | -0.74660000 | 0.78530000  | 27.33920000 |
| H | -10.04280000 | 7.32600000  | 20.99210000 | H | 0.11340000  | 2.13090000  | 28.04970000 |
| H | -12.15440000 | 6.61390000  | 23.03330000 | H | 1.49500000  | 0.51380000  | 29.39280000 |
| H | -11.82480000 | 4.43900000  | 22.79490000 | H | 0.64780000  | -0.82150000 | 28.66560000 |
| H | -10.06680000 | 4.57750000  | 22.74070000 | H | -1.50810000 | 0.00880000  | 29.64920000 |
| H | -11.74200000 | 7.29740000  | 18.56950000 | H | -0.68220000 | 1.31030000  | 30.42670000 |
| H | -11.94330000 | 5.61020000  | 18.21720000 | N | 0.99550000  | -0.31810000 | 31.95130000 |
| H | -9.66430000  | 5.43980000  | 18.98680000 | C | 0.98180000  | 0.90240000  | 32.78540000 |
| H | -10.44280000 | 7.89380000  | 23.77330000 | C | 1.63430000  | 0.54880000  | 34.15290000 |
| H | -11.21760000 | 9.09200000  | 21.31100000 | C | 2.39950000  | -0.75110000 | 33.84680000 |
| H | -11.42840000 | 2.78700000  | 21.25970000 | C | 1.48610000  | -1.40320000 | 32.80220000 |
| H | -12.68420000 | 3.62750000  | 20.39640000 | C | 1.69290000  | 2.08430000  | 32.07640000 |
| C | -0.23610000  | -3.13100000 | 22.36010000 | O | 3.00130000  | 1.71890000  | 31.65480000 |
| C | -0.77740000  | -2.53870000 | 23.64500000 | O | 3.71300000  | -0.50420000 | 33.35900000 |
| C | -2.09200000  | -2.33160000 | 24.04610000 | O | 0.68550000  | 0.40680000  | 35.21360000 |
| N | -2.00420000  | -1.75170000 | 25.28390000 | H | -0.04600000 | 1.21540000  | 32.97860000 |
| N | -0.72760000  | -1.59950000 | 25.63650000 | H | 2.33670000  | 1.32600000  | 34.46220000 |
| N | 0.03060000   | -2.10990000 | 24.60090000 | H | 2.47470000  | -1.37870000 | 34.73610000 |
| C | -3.07620000  | -1.29550000 | 26.16100000 | H | 0.65650000  | -1.89420000 | 33.31290000 |
| C | -2.98650000  | -1.92460000 | 27.57060000 | H | 2.00360000  | -2.17430000 | 32.22960000 |
| C | -4.10090000  | -1.42950000 | 28.50910000 | H | 1.74890000  | 2.94710000  | 32.74220000 |
| C | -3.97580000  | -1.98770000 | 29.93810000 | H | 1.12040000  | 2.41460000  | 31.20980000 |
| C | -5.12020000  | -1.52160000 | 30.86160000 | H | 2.88060000  | 1.06730000  | 30.95040000 |
| C | -4.96310000  | -1.96030000 | 32.33210000 | H | 3.64340000  | 0.21110000  | 32.70560000 |
| H | 0.32040000   | -4.04570000 | 22.56400000 | H | 1.17200000  | 0.40230000  | 36.04600000 |
| H | -1.07270000  | -3.42590000 | 21.72640000 | H | -0.20550000 | -1.67000000 | 30.89700000 |
| H | -3.04030000  | -2.53270000 | 23.57570000 | H | -1.09250000 | -0.63710000 | 31.98820000 |
| H | -4.03020000  | -1.53730000 | 25.69170000 | C | 8.94800000  | -3.50600000 | 20.97930000 |
| H | -3.01000000  | -0.20790000 | 26.21800000 | C | 10.13660000 | -2.77730000 | 21.57900000 |
| H | -2.01660000  | -1.69330000 | 28.01600000 | C | 10.51550000 | -2.65930000 | 22.91080000 |
| H | -3.03100000  | -3.01250000 | 27.49270000 | N | 11.67110000 | -1.92550000 | 22.89790000 |
| H | -5.07270000  | -1.70120000 | 28.09340000 | N | 11.99240000 | -1.58560000 | 21.64750000 |
| H | -4.08110000  | -0.33860000 | 28.54990000 | N | 11.02200000 | -2.13770000 | 20.83010000 |
| H | -3.01610000  | -1.68690000 | 30.35990000 | C | 12.50420000 | -1.52180000 | 24.02690000 |
| H | -3.95680000  | -3.07840000 | 29.90800000 | C | 13.98180000 | -1.93420000 | 23.83350000 |
| H | -6.05730000  | -1.93220000 | 30.48350000 | C | 14.85760000 | -1.64340000 | 25.06490000 |
| H | -5.23760000  | -0.44260000 | 30.79140000 | C | 16.34770000 | -1.92830000 | 24.80550000 |
| N | -3.78420000  | -1.36340000 | 32.97580000 | C | 17.23580000 | -1.68440000 | 26.04370000 |
| C | -3.99860000  | -0.08800000 | 33.68580000 | C | 18.74820000 | -1.84870000 | 25.77950000 |
| C | -2.77350000  | 0.05770000  | 34.61080000 | H | 9.29040000  | -4.35140000 | 20.38580000 |
| C | -2.46780000  | -1.39530000 | 35.02770000 | H | 8.34860000  | -3.93520000 | 21.78580000 |
| C | -3.18900000  | -2.25670000 | 33.97490000 | H | 10.08590000 | -3.02280000 | 23.82870000 |
| C | -4.23490000  | 1.15490000  | 32.79150000 | H | 12.09490000 | -1.97580000 | 24.93020000 |
| O | -3.26060000  | 1.23270000  | 31.76630000 | H | 12.41120000 | -0.44080000 | 24.13920000 |
| O | -1.08950000  | -1.70040000 | 35.15990000 | H | 14.39150000 | -1.40500000 | 22.97000000 |
| O | -2.96890000  | 0.94310000  | 35.71250000 | H | 14.04190000 | -2.99750000 | 23.59350000 |
| H | -4.87240000  | -0.20070000 | 34.33140000 | H | 14.50900000 | -2.23960000 | 25.91000000 |
| H | -1.94440000  | 0.42340000  | 34.00240000 | H | 14.73930000 | -0.59840000 | 25.35860000 |
| H | -2.95700000  | -1.58970000 | 35.98390000 | H | 16.68630000 | -1.29860000 | 23.98080000 |



|   |             |             |             |   |             |             |             |
|---|-------------|-------------|-------------|---|-------------|-------------|-------------|
| H | 16.47600000 | -2.95740000 | 24.46590000 | C | 15.12780000 | 1.64950000  | 11.70740000 |
| H | 16.94730000 | -2.38830000 | 26.82530000 | C | 15.91220000 | 2.97570000  | 11.66810000 |
| H | 17.02160000 | -0.70200000 | 26.45760000 | C | 16.89860000 | 3.06710000  | 10.49100000 |
| N | 19.23610000 | -0.91310000 | 24.75790000 | C | 17.67580000 | 4.40330000  | 10.46430000 |
| C | 19.77680000 | 0.37020000  | 25.24180000 | C | 18.83160000 | 4.44810000  | 9.44230000  |
| C | 20.63140000 | 0.94200000  | 24.07930000 | H | 9.90970000  | -1.75460000 | 12.74710000 |
| C | 20.97690000 | -0.29120000 | 23.21260000 | H | 10.70260000 | -2.90410000 | 13.76560000 |
| C | 20.34860000 | -1.46270000 | 23.98580000 | H | 11.72890000 | 1.03030000  | 13.86730000 |
| C | 18.74150000 | 1.37700000  | 25.79740000 | H | 15.15780000 | 1.31190000  | 13.86550000 |
| O | 17.72220000 | 1.62590000  | 24.84720000 | H | 13.81490000 | 2.29910000  | 13.32210000 |
| O | 20.50100000 | -0.18790000 | 21.87290000 | H | 14.40030000 | 1.63020000  | 10.89350000 |
| O | 21.78850000 | 1.64100000  | 24.53390000 | H | 15.81020000 | 0.81620000  | 11.52560000 |
| H | 20.46990000 | 0.14030000  | 26.05490000 | H | 16.47710000 | 3.08710000  | 12.59590000 |
| H | 20.01510000 | 1.61510000  | 23.47790000 | H | 15.21470000 | 3.81450000  | 11.63680000 |
| H | 22.05930000 | -0.43330000 | 23.19320000 | H | 16.37470000 | 2.92450000  | 9.54510000  |
| H | 21.09770000 | -1.88770000 | 24.65870000 | H | 17.60370000 | 2.23750000  | 10.56920000 |
| H | 20.02380000 | -2.26370000 | 23.31970000 | H | 18.06590000 | 4.62610000  | 11.45790000 |
| H | 19.22850000 | 2.31840000  | 26.05540000 | H | 16.98050000 | 5.21320000  | 10.24070000 |
| H | 18.30870000 | 1.01220000  | 26.72780000 | H | 19.83960000 | 3.42180000  | 9.72190000  |
| H | 17.52970000 | 0.77870000  | 24.42230000 | N | 20.80390000 | 3.15840000  | 8.64300000  |
| H | 20.73430000 | -0.98480000 | 21.39160000 | C | 22.10880000 | 2.63980000  | 9.31380000  |
| H | 21.52800000 | 2.53070000  | 24.78840000 | C | 21.79300000 | 2.62290000  | 10.82810000 |
| H | 18.90090000 | -2.87430000 | 25.43510000 | C | 20.63760000 | 3.62820000  | 10.93040000 |
| H | 19.32200000 | -1.75730000 | 26.70400000 | C | 20.23360000 | 2.21010000  | 7.56170000  |
| C | 10.03300000 | -6.04050000 | 17.39570000 | O | 19.76090000 | 1.02190000  | 8.17080000  |
| C | 10.99540000 | -6.11990000 | 16.22330000 | O | 21.42660000 | 1.34480000  | 11.34060000 |
| C | 12.37310000 | -6.28330000 | 16.21650000 | O | 23.24140000 | 3.44620000  | 8.99340000  |
| N | 12.72840000 | -6.27650000 | 14.89450000 | H | 21.03930000 | 4.10900000  | 8.15860000  |
| N | 11.65180000 | -6.13830000 | 14.11840000 | H | 22.33340000 | 1.62290000  | 8.98670000  |
| N | 10.56600000 | -6.06050000 | 14.97180000 | H | 22.65280000 | 2.97720000  | 11.39940000 |
| C | 14.05670000 | -6.39760000 | 14.31420000 | H | 21.03440000 | 4.64510000  | 10.95440000 |
| C | 14.54830000 | -5.06500000 | 13.70870000 | H | 20.06090000 | 3.48200000  | 11.84530000 |
| C | 16.00550000 | -5.17130000 | 13.22630000 | H | 20.99040000 | 1.97250000  | 6.81200000  |
| C | 16.56180000 | -3.86770000 | 12.62650000 | H | 19.41230000 | 2.69280000  | 7.03080000  |
| C | 18.06080000 | -3.99100000 | 12.29270000 | H | 19.38620000 | 1.30560000  | 9.01840000  |
| C | 18.65600000 | -2.72790000 | 11.64430000 | H | 22.09790000 | 0.69200000  | 11.06920000 |
| H | 9.03190000  | -6.37030000 | 17.11230000 | H | 23.06470000 | 4.35740000  | 9.24420000  |
| H | 10.34590000 | -6.72430000 | 18.18430000 | H | 19.28850000 | 5.44010000  | 9.41470000  |
| H | 13.10580000 | -6.37340000 | 17.00040000 | H | 18.41000000 | 4.27260000  | 8.45250000  |
| H | 14.02430000 | -7.18280000 | 13.55730000 | C | 8.98770000  | 1.34290000  | 13.02290000 |
| H | 14.73580000 | -6.73620000 | 15.09730000 | C | 9.44260000  | 2.69710000  | 12.50870000 |
| H | 14.46950000 | -4.26650000 | 14.44970000 | C | 10.62870000 | 3.04000000  | 11.86210000 |
| H | 13.90330000 | -4.77050000 | 12.87760000 | N | 10.58100000 | 4.40320000  | 11.71760000 |
| H | 16.08600000 | -5.96960000 | 12.48600000 | N | 9.43160000  | 4.87840000  | 12.19760000 |
| H | 16.63390000 | -5.47360000 | 14.06620000 | N | 8.72230000  | 3.79340000  | 12.67720000 |
| H | 16.41060000 | -3.04620000 | 13.32940000 | C | 11.60290000 | 5.34020000  | 11.25680000 |
| H | 15.99520000 | -3.60600000 | 11.73060000 | C | 12.43550000 | 4.83160000  | 10.05940000 |
| H | 18.21400000 | -4.83820000 | 11.62190000 | C | 13.44070000 | 5.90440000  | 9.59450000  |
| H | 18.60050000 | -4.22880000 | 13.21010000 | C | 14.29970000 | 5.48440000  | 8.38980000  |
| N | 20.09390000 | -2.90100000 | 11.40490000 | C | 15.19900000 | 6.62750000  | 7.88230000  |
| C | 20.68930000 | -1.89030000 | 10.51630000 | C | 16.15670000 | 6.19490000  | 6.75580000  |
| C | 22.19690000 | -1.92260000 | 10.84340000 | H | 9.58180000  | 0.57470000  | 12.52570000 |
| C | 22.19160000 | -2.10560000 | 12.36770000 | H | 9.21370000  | 1.26300000  | 14.08550000 |
| C | 20.89960000 | -2.89770000 | 12.63660000 | H | 11.48680000 | 2.46270000  | 11.56100000 |
| C | 20.36910000 | -2.09290000 | 9.01400000  | H | 12.24470000 | 5.56110000  | 12.11050000 |
| O | 20.78570000 | -3.37430000 | 8.57490000  | H | 11.10840000 | 6.27570000  | 10.98590000 |
| O | 23.37570000 | -2.70950000 | 12.87230000 | H | 11.76970000 | 4.57640000  | 9.23370000  |
| O | 22.94430000 | -0.78520000 | 10.40890000 | H | 12.97270000 | 3.92020000  | 10.32650000 |
| H | 20.30770000 | -0.91080000 | 10.81190000 | H | 14.09800000 | 6.17120000  | 10.42460000 |
| H | 22.62650000 | -2.82590000 | 10.40200000 | H | 12.89580000 | 6.81600000  | 9.33960000  |
| H | 22.06680000 | -1.12330000 | 12.82850000 | H | 13.64790000 | 5.16890000  | 7.57610000  |
| H | 20.36890000 | -2.45600000 | 13.48240000 | H | 14.90680000 | 4.61870000  | 8.65720000  |
| H | 21.12670000 | -3.93340000 | 12.89520000 | H | 15.78690000 | 7.03000000  | 8.70880000  |
| H | 20.87250000 | -1.33500000 | 8.41340000  | H | 14.55810000 | 7.44140000  | 7.54150000  |
| H | 19.30200000 | -1.96620000 | 8.82730000  | N | 16.91400000 | 7.33700000  | 6.23710000  |
| H | 20.44050000 | -4.00700000 | 9.21710000  | C | 18.05440000 | 6.97950000  | 5.37850000  |
| H | 24.12280000 | -2.19100000 | 12.55610000 | C | 18.32040000 | 8.18550000  | 4.43770000  |
| H | 23.10800000 | -0.89550000 | 9.46350000  | C | 17.09890000 | 9.11690000  | 4.62710000  |
| H | 18.46910000 | -1.84750000 | 12.26360000 | C | 16.11070000 | 8.25450000  | 5.42370000  |
| H | 18.13580000 | -2.55180000 | 10.70140000 | C | 19.30060000 | 6.50150000  | 6.16170000  |
| C | 10.56800000 | -1.83100000 | 13.61070000 | O | 19.64910000 | 7.43340000  | 7.16950000  |
| C | 11.90030000 | -1.15690000 | 13.33360000 | O | 17.40560000 | 10.34120000 | 5.28720000  |
| C | 12.26300000 | 0.17340000  | 13.49540000 | O | 18.52140000 | 7.79870000  | 3.08060000  |
| N | 13.56310000 | 0.25460000  | 13.08290000 | H | 17.74100000 | 6.14770000  | 4.74560000  |
| N | 14.01070000 | -0.94940000 | 12.71480000 | H | 19.21580000 | 8.71450000  | 4.77090000  |
| N | 12.94910000 | -1.82580000 | 12.87550000 | H | 16.65010000 | 9.35380000  | 3.66060000  |
| C | 14.42490000 | 1.43180000  | 13.06670000 | H | 15.48030000 | 7.69910000  | 4.72620000  |

|   |             |             |             |                         |            |             |             |
|---|-------------|-------------|-------------|-------------------------|------------|-------------|-------------|
| H | 15.44260000 | 8.87310000  | 6.02460000  | H                       | 5.61630000 | -1.55380000 | -0.17150000 |
| H | 20.14530000 | 6.35010000  | 5.48790000  | H                       | 5.01830000 | 0.07500000  | -0.34390000 |
| H | 19.10420000 | 5.53530000  | 6.62380000  | N                       | 4.05500000 | -1.21680000 | -2.48610000 |
| H | 18.82070000 | 7.86070000  | 7.43180000  | C                       | 4.78740000 | -2.32070000 | -3.13740000 |
| H | 18.10060000 | 10.78830000 | 4.79580000  | C                       | 4.66950000 | -2.01710000 | -4.64390000 |
| H | 17.80380000 | 7.19230000  | 2.81210000  | C                       | 3.22240000 | -1.50780000 | -4.76420000 |
| H | 15.61450000 | 5.70540000  | 5.94700000  | C                       | 2.90830000 | -0.94940000 | -3.36420000 |
| H | 16.84010000 | 5.44670000  | 7.15880000  | C                       | 6.25140000 | -2.53540000 | -2.67610000 |
| C | 8.47720000  | -2.58370000 | 8.95420000  | O                       | 6.97730000 | -1.31660000 | -2.69750000 |
| C | 9.56460000  | -1.52640000 | 9.04700000  | O                       | 2.99770000 | -0.58490000 | -5.82250000 |
| C | 9.92250000  | -0.54180000 | 8.13850000  | O                       | 4.94780000 | -3.13160000 | -5.48800000 |
| N | 10.89610000 | 0.19060000  | 8.76850000  | H                       | 4.24520000 | -3.25240000 | -2.95740000 |
| N | 11.15250000 | -0.31170000 | 9.97590000  | H                       | 5.35650000 | -1.19760000 | -4.87130000 |
| N | 10.33120000 | -1.41300000 | 10.11950000 | H                       | 2.57220000 | -2.37330000 | -4.90860000 |
| C | 11.55450000 | 1.42280000  | 8.35650000  | H                       | 1.99310000 | -1.41720000 | -2.99600000 |
| C | 11.65410000 | 1.57570000  | 6.82370000  | H                       | 2.73720000 | 0.12790000  | -3.69550000 |
| C | 12.30540000 | 2.90980000  | 6.44030000  | H                       | 6.74850000 | -3.26350000 | -3.31920000 |
| C | 12.41930000 | 3.13170000  | 4.92350000  | H                       | 6.27760000 | -2.96880000 | -1.67700000 |
| C | 12.90000000 | 4.55640000  | 4.60520000  | H                       | 6.36890000 | -0.63430000 | -2.38530000 |
| C | 13.14370000 | 4.81350000  | 3.10920000  | H                       | 3.18840000 | -1.01730000 | -6.65910000 |
| H | 8.41410000  | -2.97320000 | 7.93830000  | H                       | 5.25390000 | -2.80530000 | -6.33900000 |
| H | 8.71120000  | -3.44610000 | 9.58140000  | H                       | 2.74660000 | -0.83740000 | -0.89280000 |
| H | 9.53910000  | -0.27450000 | 7.16930000  | H                       | 3.36840000 | -2.46350000 | -0.90920000 |
| H | 12.55160000 | 1.44500000  | 8.80140000  | 1 2 1.5 7 1.5 8 1.0     |            |             |             |
| H | 10.98710000 | 2.24540000  | 8.79280000  | 2 3 1.5 85 1.0          |            |             |             |
| H | 10.66210000 | 1.53260000  | 6.37160000  | 3 4 1.5 79 1.0          |            |             |             |
| H | 12.23070000 | 0.74860000  | 6.40430000  | 4 5 1.0 6 1.5           |            |             |             |
| H | 13.29950000 | 2.96610000  | 6.88750000  | 5                       |            |             |             |
| H | 11.72370000 | 3.72320000  | 6.87870000  | 6 7 1.5 12 1.0          |            |             |             |
| H | 11.45210000 | 2.96130000  | 4.44700000  | 7 86 1.0                |            |             |             |
| H | 13.10680000 | 2.39790000  | 4.49860000  | 8 9 1.0 10 1.0 11 1.0   |            |             |             |
| H | 13.82610000 | 4.74330000  | 5.14600000  | 9                       |            |             |             |
| H | 12.16990000 | 5.26640000  | 4.99550000  | 10                      |            |             |             |
| N | 13.63430000 | 6.18160000  | 2.91470000  | 11                      |            |             |             |
| C | 14.21600000 | 6.44570000  | 1.58850000  | 12 13 1.0 14 1.0 17 1.0 |            |             |             |
| C | 14.19890000 | 7.98350000  | 1.40340000  | 13                      |            |             |             |
| C | 13.11020000 | 8.48110000  | 2.38600000  | 14                      |            |             |             |
| C | 12.59150000 | 7.19810000  | 3.05530000  | 15 16 1.5 21 1.5 22 1.0 |            |             |             |
| C | 15.62310000 | 5.82410000  | 1.40360000  | 16 17 1.5 87 1.0        |            |             |             |
| O | 16.40930000 | 6.12430000  | 2.54600000  | 17 18 1.5               |            |             |             |
| O | 13.58870000 | 9.42790000  | 3.33510000  | 18 19 1.0 20 1.5        |            |             |             |
| O | 13.97060000 | 8.36860000  | 0.05020000  | 19                      |            |             |             |
| H | 13.54870000 | 6.02340000  | 0.83330000  | 20 21 1.5 26 1.0        |            |             |             |
| H | 15.16550000 | 8.37480000  | 1.72770000  | 21 88 1.0               |            |             |             |
| H | 12.27620000 | 8.91800000  | 1.83310000  | 22 23 1.0 24 1.0 25 1.0 |            |             |             |
| H | 11.68130000 | 6.87670000  | 2.54430000  | 23                      |            |             |             |
| H | 12.32740000 | 7.37100000  | 4.09970000  | 24                      |            |             |             |
| H | 16.10260000 | 6.19260000  | 0.49450000  | 25                      |            |             |             |
| H | 15.54710000 | 4.74100000  | 1.29750000  | 26 27 1.0 28 1.0 31 1.0 |            |             |             |
| H | 15.78530000 | 6.01910000  | 3.28180000  | 27                      |            |             |             |
| H | 13.75810000 | 10.26760000 | 2.89920000  | 28                      |            |             |             |
| H | 14.11860000 | 9.31370000  | -0.04890000 | 29 30 1.5 35 1.5 36 1.0 |            |             |             |
| H | 12.23950000 | 4.62850000  | 2.52450000  | 30 31 1.5 89 1.0        |            |             |             |
| H | 13.88650000 | 4.09500000  | 2.75830000  | 31 32 1.5               |            |             |             |
| C | 3.93430000  | -1.94410000 | 9.32850000  | 32 33 1.0 34 1.5        |            |             |             |
| C | 4.43330000  | -1.16370000 | 8.12890000  | 33                      |            |             |             |
| C | 5.13540000  | -1.59930000 | 7.01370000  | 34 35 1.5 47 1.0        |            |             |             |
| N | 5.28330000  | -0.49360000 | 6.22510000  | 35 90 1.0               |            |             |             |
| N | 4.71870000  | 0.57150000  | 6.79700000  | 36 37 1.0 38 1.0 39 1.0 |            |             |             |
| N | 4.20090000  | 0.13440000  | 8.00450000  | 37                      |            |             |             |
| C | 5.85700000  | -0.40690000 | 4.89090000  | 38                      |            |             |             |
| C | 4.76180000  | -0.62940000 | 3.82690000  | 39                      |            |             |             |
| C | 5.29870000  | -0.60810000 | 2.38540000  | 40 41 1.5 46 1.5 50 1.0 |            |             |             |
| C | 4.21600000  | -0.98160000 | 1.35750000  | 41 42 1.5 91 1.0        |            |             |             |
| C | 4.71880000  | -0.94470000 | -0.09630000 | 42 43 1.5 47 1.0        |            |             |             |
| C | 3.64620000  | -1.42380000 | -1.09260000 | 43 44 1.0 45 1.5        |            |             |             |
| H | 4.34310000  | -1.53460000 | 10.25280000 | 44                      |            |             |             |
| H | 2.85110000  | -1.84850000 | 9.40340000  | 45 46 1.5 82 1.0        |            |             |             |
| H | 5.50070000  | -2.56960000 | 6.72410000  | 46 92 1.0               |            |             |             |
| H | 6.64020000  | -1.16140000 | 4.80880000  | 47 48 1.0 49 1.0        |            |             |             |
| H | 6.33070000  | 0.56950000  | 4.77620000  | 48                      |            |             |             |
| H | 3.98650000  | 0.13290000  | 3.93300000  | 49                      |            |             |             |
| H | 4.27270000  | -1.58840000 | 4.01170000  | 50 51 1.0 52 1.0 53 1.0 |            |             |             |
| H | 6.13500000  | -1.30360000 | 2.29470000  | 51                      |            |             |             |
| H | 5.69820000  | 0.38230000  | 2.15920000  | 52                      |            |             |             |
| H | 3.36510000  | -0.30560000 | 1.46230000  | 53                      |            |             |             |
| H | 3.83950000  | -1.98100000 | 1.58270000  | 54 55 1.5 60 1.5 61 1.0 |            |             |             |

|                             |                             |
|-----------------------------|-----------------------------|
| 55 56 1.5 93 1.0            | 132                         |
| 56 57 1.5 82 1.0            | 133                         |
| 57 58 1.0 59 1.5            | 134                         |
| 58                          | 135                         |
| 59 60 1.5 65 1.0            | 136                         |
| 60 94 1.0                   | 137                         |
| 61 62 1.0 63 1.0 64 1.0     | 138                         |
| 62                          | 139                         |
| 63                          | 140                         |
| 64                          | 141                         |
| 65 66 1.0 67 1.0 70 1.0     | 142                         |
| 66                          | 143 144 1.0 155 1.0 156 1.0 |
| 67                          | 144 145 1.5 148 1.5         |
| 68 69 1.5 74 1.5 75 1.0     | 145 146 1.5 157 1.0         |
| 69 70 1.5 95 1.0            | 146 147 1.5 149 1.0         |
| 70 71 1.5                   | 147 148 1.5                 |
| 71 72 1.0 73 1.5            | 148                         |
| 72                          | 149 150 1.0 158 1.0 159 1.0 |
| 73 74 1.5 79 1.0            | 150 151 1.0 160 1.0 161 1.0 |
| 74 96 1.0                   | 151 152 1.0 162 1.0 163 1.0 |
| 75 76 1.0 77 1.0 78 1.0     | 152 153 1.0 164 1.0 165 1.0 |
| 76                          | 153 154 1.0 166 1.0 167 1.0 |
| 77                          | 154 168 1.0 187 1.0 188 1.0 |
| 78                          | 155                         |
| 79 80 1.0 81 1.0            | 156                         |
| 80                          | 157                         |
| 81                          | 158                         |
| 82 83 1.0 84 1.0            | 159                         |
| 83                          | 160                         |
| 84                          | 161                         |
| 85 97 1.0                   | 162                         |
| 86 603 1.0                  | 163                         |
| 87 557 1.0                  | 164                         |
| 88 511 1.0                  | 165                         |
| 89 465 1.0                  | 166                         |
| 90 419 1.0                  | 167                         |
| 91 373 1.0                  | 168 169 1.0 172 1.0         |
| 92 327 1.0                  | 169 170 1.0 173 1.0 177 1.0 |
| 93 281 1.0                  | 170 171 1.0 176 1.0 178 1.0 |
| 94 235 1.0                  | 171 172 1.0 175 1.0 179 1.0 |
| 95 189 1.0                  | 172 180 1.0 181 1.0         |
| 96 143 1.0                  | 173 174 1.0 182 1.0 183 1.0 |
| 97 98 1.0 109 1.0 110 1.0   | 174 184 1.0                 |
| 98 99 1.5 102 1.5           | 175 185 1.0                 |
| 99 100 1.5 111 1.0          | 176 186 1.0                 |
| 100 101 1.5 103 1.0         | 177                         |
| 101 102 1.5                 | 178                         |
| 102                         | 179                         |
| 103 104 1.0 112 1.0 113 1.0 | 180                         |
| 104 105 1.0 114 1.0 115 1.0 | 181                         |
| 105 106 1.0 116 1.0 117 1.0 | 182                         |
| 106 107 1.0 118 1.0 119 1.0 | 183                         |
| 107 108 1.0 120 1.0 121 1.0 | 184                         |
| 108 122 1.0 141 1.0 142 1.0 | 185                         |
| 109                         | 186                         |
| 110                         | 187                         |
| 111                         | 188                         |
| 112                         | 189 190 1.0 201 1.0 202 1.0 |
| 113                         | 190 191 1.5 194 1.5         |
| 114                         | 191 192 1.5 203 1.0         |
| 115                         | 192 193 1.5 195 1.0         |
| 116                         | 193 194 1.5                 |
| 117                         | 194                         |
| 118                         | 195 196 1.0 204 1.0 205 1.0 |
| 119                         | 196 197 1.0 206 1.0 207 1.0 |
| 120                         | 197 198 1.0 208 1.0 209 1.0 |
| 121                         | 198 199 1.0 210 1.0 211 1.0 |
| 122 123 1.0 126 1.0         | 199 200 1.0 212 1.0 213 1.0 |
| 123 124 1.0 127 1.0 131 1.0 | 200 214 1.0 233 1.0 234 1.0 |
| 124 125 1.0 130 1.0 132 1.0 | 201                         |
| 125 126 1.0 129 1.0 133 1.0 | 202                         |
| 126 134 1.0 135 1.0         | 203                         |
| 127 128 1.0 136 1.0 137 1.0 | 204                         |
| 128 138 1.0                 | 205                         |
| 129 139 1.0                 | 206                         |
| 130 140 1.0                 | 207                         |
| 131                         | 208                         |

209  
210  
211  
212  
213  
214 215 1.0 218 1.0  
215 216 1.0 219 1.0 223 1.0  
216 217 1.0 222 1.0 224 1.0  
217 218 1.0 221 1.0 225 1.0  
218 226 1.0 227 1.0  
219 220 1.0 228 1.0 229 1.0  
220 230 1.0  
221 231 1.0  
222 232 1.0  
223  
224  
225  
226  
227  
228  
229  
230  
231  
232  
233  
234  
235 236 1.0 247 1.0 248 1.0  
236 237 1.5 240 1.5  
237 238 1.5 249 1.0  
238 239 1.5 241 1.0  
239 240 1.5  
240  
241 242 1.0 250 1.0 251 1.0  
242 243 1.0 252 1.0 253 1.0  
243 244 1.0 254 1.0 255 1.0  
244 245 1.0 256 1.0 257 1.0  
245 246 1.0 258 1.0 259 1.0  
246 260 1.0 279 1.0 280 1.0  
247  
248  
249  
250  
251  
252  
253  
254  
255  
256  
257  
258  
259  
260 261 1.0 264 1.0  
261 262 1.0 265 1.0 269 1.0  
262 263 1.0 268 1.0 270 1.0  
263 264 1.0 267 1.0 271 1.0  
264 272 1.0 273 1.0  
265 266 1.0 274 1.0 275 1.0  
266 276 1.0  
267 277 1.0  
268 278 1.0  
269  
270  
271  
272  
273  
274  
275  
276  
277  
278  
279  
280  
281 282 1.0 293 1.0 294 1.0  
282 283 1.5 286 1.5  
283 284 1.5 295 1.0  
284 285 1.5 287 1.0  
285 286 1.5

286  
287 288 1.0 296 1.0 297 1.0  
288 289 1.0 298 1.0 299 1.0  
289 290 1.0 300 1.0 301 1.0  
290 291 1.0 302 1.0 303 1.0  
291 292 1.0 304 1.0 305 1.0  
292 306 1.0 325 1.0 326 1.0  
293  
294  
295  
296  
297  
298  
299  
300  
301  
302  
303  
304  
305  
306 307 1.0 310 1.0  
307 308 1.0 311 1.0 315 1.0  
308 309 1.0 314 1.0 316 1.0  
309 310 1.0 313 1.0 317 1.0  
310 318 1.0 319 1.0  
311 312 1.0 320 1.0 321 1.0  
312 322 1.0  
313 323 1.0  
314 324 1.0  
315  
316  
317  
318  
319  
320  
321  
322  
323  
324  
325  
326  
327 328 1.0 339 1.0 340 1.0  
328 329 1.5 332 1.5  
329 330 1.5 341 1.0  
330 331 1.5 333 1.0  
331 332 1.5  
332  
333 334 1.0 342 1.0 343 1.0  
334 335 1.0 344 1.0 345 1.0  
335 336 1.0 346 1.0 347 1.0  
336 337 1.0 348 1.0 349 1.0  
337 338 1.0 350 1.0 351 1.0  
338 352 1.0 371 1.0 372 1.0  
339  
340  
341  
342  
343  
344  
345  
346  
347  
348  
349  
350  
351  
352 353 1.0 356 1.0  
353 354 1.0 357 1.0 361 1.0  
354 355 1.0 360 1.0 362 1.0  
355 356 1.0 359 1.0 363 1.0  
356 364 1.0 365 1.0  
357 358 1.0 366 1.0 367 1.0  
358 368 1.0  
359 369 1.0  
360 370 1.0  
361  
362

363  
364  
365  
366  
367  
368  
369  
370  
371  
372  
373 374 1.0 385 1.0 386 1.0  
374 375 1.5 378 1.5  
375 376 1.5 387 1.0  
376 377 1.5 379 1.0  
377 378 1.5  
378  
379 380 1.0 388 1.0 389 1.0  
380 381 1.0 390 1.0 391 1.0  
381 382 1.0 392 1.0 393 1.0  
382 383 1.0 394 1.0 395 1.0  
383 384 1.0 396 1.0 397 1.0  
384 398 1.0 417 1.0 418 1.0  
385  
386  
387  
388  
389  
390  
391  
392  
393  
394  
395  
396  
397  
398 399 1.0 402 1.0  
399 400 1.0 403 1.0 407 1.0  
400 401 1.0 406 1.0 408 1.0  
401 402 1.0 405 1.0 409 1.0  
402 410 1.0 411 1.0  
403 404 1.0 412 1.0 413 1.0  
404 414 1.0  
405 415 1.0  
406 416 1.0  
407  
408  
409  
410  
411  
412  
413  
414  
415  
416  
417  
418  
419 420 1.0 431 1.0 432 1.0  
420 421 1.5 424 1.5  
421 422 1.5 433 1.0  
422 423 1.5 425 1.0  
423 424 1.5  
424  
425 426 1.0 434 1.0 435 1.0  
426 427 1.0 436 1.0 437 1.0  
427 428 1.0 438 1.0 439 1.0  
428 429 1.0 440 1.0 441 1.0  
429 430 1.0 442 1.0 443 1.0  
430 444 1.0 463 1.0 464 1.0  
431  
432  
433  
434  
435  
436  
437  
438  
439

440  
441  
442  
443  
444 445 1.0 448 1.0  
445 446 1.0 449 1.0 453 1.0  
446 447 1.0 452 1.0 454 1.0  
447 448 1.0 451 1.0 455 1.0  
448 456 1.0 457 1.0  
449 450 1.0 458 1.0 459 1.0  
450 460 1.0  
451 461 1.0  
452 462 1.0  
453  
454  
455  
456  
457  
458  
459  
460  
461  
462  
463  
464  
465 466 1.0 477 1.0 478 1.0  
466 467 1.5 470 1.5  
467 468 1.5 479 1.0  
468 469 1.5 471 1.0  
469 470 1.5  
470  
471 472 1.0 480 1.0 481 1.0  
472 473 1.0 482 1.0 483 1.0  
473 474 1.0 484 1.0 485 1.0  
474 475 1.0 486 1.0 487 1.0  
475 476 1.0 488 1.0 489 1.0  
476 490 1.0 509 1.0 510 1.0  
477  
478  
479  
480  
481  
482  
483  
484  
485  
486  
487  
488  
489  
490 491 1.0 494 1.0  
491 492 1.0 495 1.0 499 1.0  
492 493 1.0 498 1.0 500 1.0  
493 494 1.0 497 1.0 501 1.0  
494 502 1.0 503 1.0  
495 496 1.0 504 1.0 505 1.0  
496 506 1.0  
497 507 1.0  
498 508 1.0  
499  
500  
501  
502  
503  
504  
505  
506  
507  
508  
509  
510  
511 512 1.0 523 1.0 524 1.0  
512 513 1.5 516 1.5  
513 514 1.5 525 1.0  
514 515 1.5 517 1.0  
515 516 1.5  
516

517 518 1.0 526 1.0 527 1.0  
518 519 1.0 528 1.0 529 1.0  
519 520 1.0 530 1.0 531 1.0  
520 521 1.0 532 1.0 533 1.0  
521 522 1.0 534 1.0 535 1.0  
522 536 1.0 555 1.0 556 1.0  
523  
524  
525  
526  
527  
528  
529  
530  
531  
532  
533  
534  
535  
536 537 1.0 540 1.0  
537 538 1.0 541 1.0 545 1.0  
538 539 1.0 544 1.0 546 1.0  
539 540 1.0 543 1.0 547 1.0  
540 548 1.0 549 1.0  
541 542 1.0 550 1.0 551 1.0  
542 552 1.0  
543 553 1.0  
544 554 1.0  
545  
546  
547  
548  
549  
550  
551  
552  
553  
554  
555  
556  
557 558 1.0 569 1.0 570 1.0  
558 559 1.5 562 1.5  
559 560 1.5 571 1.0  
560 561 1.5 563 1.0  
561 562 1.5  
562  
563 564 1.0 572 1.0 573 1.0  
564 565 1.0 574 1.0 575 1.0  
565 566 1.0 576 1.0 577 1.0  
566 567 1.0 578 1.0 579 1.0  
567 568 1.0 580 1.0 581 1.0  
568 582 1.0 601 1.0 602 1.0  
569  
570  
571  
572  
573  
574  
575  
576  
577  
578  
579  
580  
581  
582 583 1.0 586 1.0  
583 584 1.0 587 1.0 591 1.0  
584 585 1.0 590 1.0 592 1.0  
585 586 1.0 589 1.0 593 1.0  
586 594 1.0 595 1.0  
587 588 1.0 596 1.0 597 1.0  
588 598 1.0  
589 599 1.0  
590 600 1.0  
591  
592  
593

594  
595  
596  
597  
598  
599  
600  
601  
602  
603 604 1.0 615 1.0 616 1.0  
604 605 1.5 608 1.5  
605 606 1.5 617 1.0  
606 607 1.5 609 1.0  
607 608 1.5  
608  
609 610 1.0 618 1.0 619 1.0  
610 611 1.0 620 1.0 621 1.0  
611 612 1.0 622 1.0 623 1.0  
612 613 1.0 624 1.0 625 1.0  
613 614 1.0 626 1.0 627 1.0  
614 628 1.0 647 1.0 648 1.0  
615  
616  
617  
618  
619  
620  
621  
622  
623  
624  
625  
626  
627  
628 629 1.0 632 1.0  
629 630 1.0 633 1.0 637 1.0  
630 631 1.0 636 1.0 638 1.0  
631 632 1.0 635 1.0 639 1.0  
632 640 1.0 641 1.0  
633 634 1.0 642 1.0 643 1.0  
634 644 1.0  
635 645 1.0  
636 646 1.0  
637  
638  
639  
640  
641  
642  
643  
644  
645  
646  
647  
648

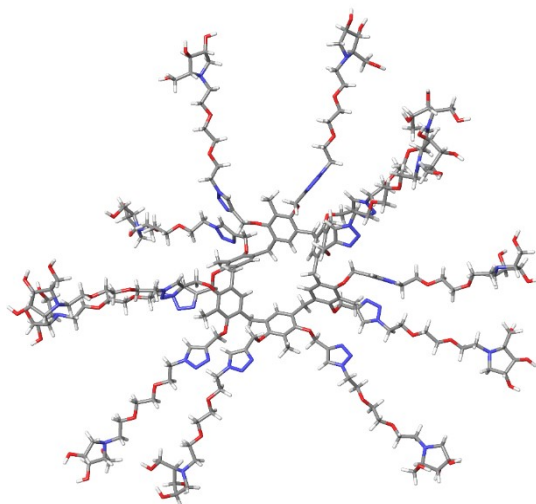

**Figure S33: Lowest energy structure of 5b**

|   |              |             |             |   |              |             |             |
|---|--------------|-------------|-------------|---|--------------|-------------|-------------|
| C | -12.74380000 | 15.79600000 | -3.10540000 | O | -17.23860000 | 12.33970000 | 4.41090000  |
| C | -12.72750000 | 16.19130000 | -1.75530000 | C | -19.41720000 | 23.56690000 | -1.51220000 |
| C | -13.58190000 | 17.21470000 | -1.31380000 | H | -18.83610000 | 23.92670000 | -0.66350000 |
| C | -14.47420000 | 17.80140000 | -2.21650000 | H | -18.69590000 | 23.06780000 | -2.16520000 |
| C | -14.49740000 | 17.42050000 | -3.55990000 | C | -20.75960000 | 20.04820000 | -5.71710000 |
| C | -13.63530000 | 16.40610000 | -4.00330000 | H | -19.86800000 | 20.62250000 | -5.45160000 |
| C | -11.73150000 | 14.77080000 | -3.61030000 | H | -20.39170000 | 19.18320000 | -6.26710000 |
| C | -15.33150000 | 18.23510000 | -4.55100000 | H | -15.10660000 | 18.61570000 | -1.89030000 |
| C | -18.20460000 | 16.55540000 | -6.47460000 | H | -10.78610000 | 14.85230000 | -3.07320000 |
| C | -16.95380000 | 17.12840000 | -6.18910000 | H | -11.50270000 | 14.91380000 | -4.66650000 |
| C | -16.69520000 | 17.64860000 | -4.91340000 | H | -12.11890000 | 13.76140000 | -3.47750000 |
| C | -17.72600000 | 17.69770000 | -3.97650000 | H | -15.49700000 | 19.23650000 | -4.14980000 |
| C | -19.01670000 | 17.26620000 | -4.29920000 | H | -14.72760000 | 18.40540000 | -5.44140000 |
| C | -19.26880000 | 16.69450000 | -5.55780000 | H | -17.53470000 | 18.12580000 | -3.00280000 |
| C | -18.38070000 | 15.79780000 | -7.77910000 | H | -19.03680000 | 16.33660000 | -8.46310000 |
| C | -20.13370000 | 17.44030000 | -3.26480000 | H | -18.76730000 | 14.80280000 | -7.58610000 |
| C | -21.01460000 | 21.13680000 | -2.76720000 | H | -17.43170000 | 15.60070000 | -8.26830000 |
| C | -20.90340000 | 19.86270000 | -3.34690000 | H | -21.10900000 | 17.18630000 | -3.68110000 |
| C | -20.22790000 | 18.84180000 | -2.66530000 | H | -19.97000000 | 16.71100000 | -2.47080000 |
| C | -19.68050000 | 19.09430000 | -1.40350000 | H | -19.19500000 | 18.29740000 | -0.85850000 |
| C | -19.75440000 | 20.36730000 | -0.83340000 | H | -22.34190000 | 22.84830000 | -2.70800000 |
| C | -20.38740000 | 21.40230000 | -1.53930000 | H | -22.62830000 | 21.79550000 | -4.06980000 |
| C | -21.84270000 | 22.22060000 | -3.44600000 | H | -21.20920000 | 22.85060000 | -4.06980000 |
| C | -21.77480000 | 19.10410000 | 2.92550000  | H | -17.92140000 | 19.15790000 | 2.50010000  |
| C | -21.19130000 | 19.87430000 | 1.90890000  | H | -18.08700000 | 20.34150000 | 0.48420000  |
| C | -19.80050000 | 19.83990000 | 1.70460000  | H | -19.15170000 | 21.66420000 | 0.80860000  |
| C | -18.99670000 | 19.12960000 | 2.60510000  | H | -23.76200000 | 20.00140000 | 2.76510000  |
| C | -19.56300000 | 18.42920000 | 3.67560000  | H | -23.57170000 | 18.94660000 | 4.14980000  |
| C | -20.95680000 | 18.37370000 | 3.79900000  | H | -23.71980000 | 18.25970000 | 2.53100000  |
| C | -19.14310000 | 20.60610000 | 0.55070000  | H | -17.10050000 | 16.65710000 | 2.96830000  |
| C | -23.29170000 | 19.08150000 | 3.10440000  | H | -18.33640000 | 13.01790000 | 7.40710000  |
| C | -18.44720000 | 14.09770000 | 5.54540000  | H | -19.12550000 | 12.10840000 | 6.10970000  |
| C | -18.78060000 | 15.45670000 | 5.65890000  | H | -19.98750000 | 13.40020000 | 6.91560000  |
| C | -18.33490000 | 16.37540000 | 4.69450000  | H | -15.60500000 | 13.22790000 | 2.78930000  |
| C | -17.48370000 | 15.93990000 | 3.68100000  | H | -16.48530000 | 14.15380000 | 1.61690000  |
| C | -17.06480000 | 14.60830000 | 3.61460000  | H | -15.35870000 | 15.93750000 | 0.58780000  |
| C | -17.57910000 | 13.67150000 | 4.52630000  | H | -10.73440000 | 15.83770000 | 4.14190000  |
| C | -19.00650000 | 13.09750000 | 6.55110000  | H | -11.89880000 | 15.50940000 | 5.39570000  |
| C | -15.99910000 | 14.22370000 | 2.59060000  | H | -11.57090000 | 17.17900000 | 4.92550000  |
| C | -12.76070000 | 16.11480000 | 3.46260000  | H | -12.53560000 | 18.37690000 | 0.10870000  |
| C | -13.88730000 | 15.28060000 | 3.58760000  | H | -14.24240000 | 18.56870000 | 0.23690000  |
| C | -14.80600000 | 15.18430000 | 2.52770000  | H | -17.72860000 | 18.41570000 | 4.79830000  |
| C | -14.63700000 | 15.98290000 | 1.39160000  | H | -19.13620000 | 18.10040000 | 5.73550000  |
| C | -13.56340000 | 16.87170000 | 1.29350000  | C | -16.15520000 | 11.89780000 | 5.23320000  |
| C | -12.61230000 | 16.92240000 | 2.32560000  | C | -21.03350000 | 15.13370000 | -6.24110000 |
| C | -11.68980000 | 16.16180000 | 4.55020000  | O | -11.80010000 | 15.65840000 | -0.89030000 |
| C | -13.46780000 | 17.81470000 | 0.09210000  | O | -13.58860000 | 16.10190000 | -5.34310000 |
| C | -18.66920000 | 17.86340000 | 4.78070000  | O | -15.97480000 | 17.17320000 | -7.16000000 |
| O | -20.58890000 | 16.44720000 | -5.89410000 | O | -21.98980000 | 20.70310000 | 1.15630000  |
| O | -21.47890000 | 19.58750000 | -4.56750000 | O | -21.51660000 | 17.66100000 | 4.82840000  |
| O | -20.41240000 | 22.67120000 | -1.00790000 | O | -19.55080000 | 15.87750000 | 6.71800000  |

|   |              |             |             |   |              |             |             |
|---|--------------|-------------|-------------|---|--------------|-------------|-------------|
| O | -14.10100000 | 14.56770000 | 4.74810000  | C | -18.33410000 | -1.66300000 | 11.76580000 |
| O | -11.57100000 | 17.82250000 | 2.27090000  | C | -18.24380000 | -2.72140000 | 12.88770000 |
| C | -12.05980000 | 14.33630000 | -0.40840000 | C | -18.41330000 | -1.93650000 | 14.19360000 |
| C | -10.77030000 | 13.53530000 | -0.35720000 | C | -19.45750000 | -0.87700000 | 13.84240000 |
| C | -10.45630000 | 12.32280000 | -0.95820000 | C | -18.76080000 | -2.25680000 | 10.40000000 |
| N | -9.16350000  | 12.06080000 | -0.59110000 | O | -17.83900000 | -3.26430000 | 10.03920000 |
| N | -8.68640000  | 13.03820000 | 0.18240000  | O | -18.81040000 | -2.69940000 | 15.31440000 |
| N | -9.71360000  | 13.95310000 | 0.32620000  | O | -17.04290000 | -3.46610000 | 12.83660000 |
| C | -8.32840000  | 10.92840000 | -0.95290000 | C | -18.81710000 | 16.29200000 | 7.87520000  |
| C | -7.23200000  | 11.34850000 | -1.94230000 | C | -19.42730000 | 15.71440000 | 9.14100000  |
| O | -6.47910000  | 10.18320000 | -2.25020000 | C | -18.83530000 | 14.96410000 | 10.15040000 |
| C | -5.50170000  | 10.36690000 | -3.26790000 | N | -19.82520000 | 14.74430000 | 11.07260000 |
| C | -4.70650000  | 9.06140000  | -3.42360000 | N | -20.97400000 | 15.28640000 | 10.65860000 |
| C | -2.41540000  | 8.04620000  | -6.15380000 | N | -20.70270000 | 15.90250000 | 9.45060000  |
| N | -1.33340000  | 6.95570000  | -6.36970000 | C | -19.75280000 | 14.02850000 | 12.34230000 |
| C | -1.81550000  | 5.48250000  | -6.28180000 | C | -20.35080000 | 14.85650000 | 13.49660000 |
| C | -0.94860000  | 4.74030000  | -7.30880000 | O | -20.16630000 | 14.15200000 | 14.72280000 |
| C | -0.73640000  | 5.75410000  | -8.44250000 | C | -20.76510000 | 14.78650000 | 15.84940000 |
| C | -0.59310000  | 7.10390000  | -7.72520000 | C | -20.39900000 | 14.02530000 | 17.13670000 |
| C | -1.74370000  | 4.84090000  | -4.88040000 | C | -21.54260000 | 14.72670000 | 20.60170000 |
| O | -0.51800000  | 5.25350000  | -4.29990000 | N | -21.26060000 | 14.17970000 | 22.02480000 |
| O | 0.36730000   | 5.44030000  | -9.27510000 | C | -21.98310000 | 14.96280000 | 23.14850000 |
| O | -1.55060000  | 3.52050000  | -7.70130000 | C | -22.07900000 | 13.95040000 | 24.30010000 |
| C | -10.40580000 | 17.41040000 | 1.54810000  | C | -22.35600000 | 12.60880000 | 23.59790000 |
| C | -9.19620000  | 17.33610000 | 2.46110000  | C | -21.62110000 | 12.69030000 | 22.24550000 |
| C | -8.26820000  | 16.31480000 | 2.61600000  | C | -21.31450000 | 16.29030000 | 23.55630000 |
| N | -7.41430000  | 16.74890000 | 3.59470000  | O | -19.92660000 | 16.02970000 | 23.67060000 |
| N | -7.77320000  | 17.95880000 | 4.02800000  | O | -21.96120000 | 11.46910000 | 24.33200000 |
| N | -8.89290000  | 18.31590000 | 3.30130000  | O | -23.06100000 | 14.35300000 | 25.24050000 |
| C | -6.28400000  | 16.06220000 | 4.19630000  | C | -22.00940000 | 16.37010000 | 4.46810000  |
| C | -6.61530000  | 15.66530000 | 5.64240000  | C | -22.96530000 | 15.91300000 | 5.54490000  |
| O | -5.46810000  | 15.05730000 | 6.22250000  | C | -22.70070000 | 15.26900000 | 6.74270000  |
| C | -5.72280000  | 14.47400000 | 7.49670000  | N | -23.90280000 | 15.20190000 | 7.38580000  |
| C | -4.40480000  | 14.04560000 | 8.16210000  | N | -24.87660000 | 15.69930000 | 6.61830000  |
| C | -1.91630000  | 16.22370000 | 9.83770000  | N | -24.26850000 | 16.13540000 | 5.45500000  |
| N | -0.84840000  | 15.99990000 | 10.93950000 | C | -24.17790000 | 14.77640000 | 8.74560000  |
| C | 0.51180000   | 15.40680000 | 10.48740000 | C | -24.47740000 | 16.01220000 | 9.60360000  |
| C | 1.49550000   | 15.92730000 | 11.54930000 | O | -24.75440000 | 15.60360000 | 10.93640000 |
| C | 1.01550000   | 17.36070000 | 11.83560000 | C | -25.23390000 | 16.67070000 | 11.74260000 |
| C | -0.51600000  | 17.29330000 | 11.72700000 | C | -25.41370000 | 16.17600000 | 13.17990000 |
| O | 0.56480000   | 13.87280000 | 10.33060000 | C | -27.25490000 | 17.86030000 | 15.90930000 |
| O | -0.11690000  | 13.31640000 | 11.44140000 | N | -27.40740000 | 17.63280000 | 17.43170000 |
| O | 1.42880000   | 17.89210000 | 13.08200000 | C | -26.15250000 | 17.95450000 | 18.29650000 |
| O | 2.84220000   | 15.81440000 | 11.11960000 | C | -26.67410000 | 18.85660000 | 19.44940000 |
| C | -14.58340000 | 15.35720000 | 5.84840000  | C | -28.18220000 | 18.53930000 | 19.53530000 |
| C | -14.51800000 | 14.56120000 | 7.13840000  | C | -28.57370000 | 18.42440000 | 18.06200000 |
| C | -13.57010000 | 13.64330000 | 7.57170000  | C | -25.35660000 | 16.72310000 | 18.77180000 |
| N | -14.00340000 | 13.22920000 | 8.80210000  | O | -26.26340000 | 15.83900000 | 19.40800000 |
| N | -15.14110000 | 13.84640000 | 9.13190000  | O | -28.45680000 | 17.34070000 | 20.25190000 |
| N | -15.44950000 | 14.68120000 | 8.07300000  | O | -26.41040000 | 20.21700000 | 19.13770000 |
| C | -13.36880000 | 12.29540000 | 9.71850000  | C | -22.09520000 | 22.02730000 | 1.68840000  |
| C | -14.27790000 | 11.09930000 | 10.03530000 | C | -23.37620000 | 22.68920000 | 1.22070000  |
| O | -13.58570000 | 10.29710000 | 10.98290000 | C | -24.65710000 | 22.60950000 | 1.75260000  |
| C | -14.37150000 | 9.26850000  | 11.56790000 | N | -25.41740000 | 23.45860000 | 0.99740000  |
| C | -13.48050000 | 8.49640000  | 12.55290000 | N | -24.67310000 | 24.04360000 | 0.05510000  |
| C | -14.49930000 | 6.31600000  | 15.35910000 | N | -23.39000000 | 23.55470000 | 0.21720000  |
| N | -13.81970000 | 5.22260000  | 16.21760000 | C | -26.82940000 | 23.77360000 | 1.13630000  |
| C | -12.71560000 | 5.69110000  | 17.21040000 | C | -27.03070000 | 25.26960000 | 1.41890000  |
| C | -13.09000000 | 5.03900000  | 18.56990000 | O | -28.42470000 | 25.50950000 | 1.56400000  |
| C | -13.97740000 | 3.83240000  | 18.18530000 | C | -28.76210000 | 26.89130000 | 1.61930000  |
| C | -14.83040000 | 4.41310000  | 17.05740000 | C | -30.28820000 | 27.04990000 | 1.71200000  |
| C | -11.27140000 | 5.39170000  | 16.76340000 | C | -32.23720000 | 29.88300000 | 0.40020000  |
| O | -11.19510000 | 4.01450000  | 16.43690000 | N | -33.73230000 | 30.17740000 | 0.13770000  |
| O | -13.25760000 | 2.68860000  | 17.73410000 | C | -34.56140000 | 30.68130000 | 1.35250000  |
| O | -13.78760000 | 5.98590000  | 19.37160000 | C | -35.21420000 | 32.00040000 | 0.86600000  |
| C | -16.59440000 | 10.75000000 | 6.12380000  | C | -35.31680000 | 31.84590000 | -0.66600000 |
| C | -17.07470000 | 9.49200000  | 5.78520000  | C | -33.97310000 | 31.18910000 | -1.00800000 |
| N | -17.30570000 | 8.85470000  | 6.97530000  | C | -35.54590000 | 29.63150000 | 1.91310000  |
| N | -16.99040000 | 9.65430000  | 7.99890000  | O | -36.08790000 | 28.89590000 | 0.83210000  |
| N | -16.52370000 | 10.83180000 | 7.44420000  | O | -36.41760000 | 31.03110000 | -1.05660000 |
| C | -17.86090000 | 7.52430000  | 7.19460000  | O | -34.39020000 | 33.11290000 | 1.19470000  |
| C | -17.15590000 | 6.76880000  | 8.33570000  | C | -20.07130000 | 24.73990000 | -2.21820000 |
| O | -17.70550000 | 5.45760000  | 8.38800000  | C | -21.27830000 | 25.37560000 | -1.96180000 |
| C | -17.38970000 | 4.73010000  | 9.56950000  | N | -21.37910000 | 26.35890000 | -2.90540000 |
| C | -18.00240000 | 3.32280000  | 9.47180000  | N | -20.30110000 | 26.36470000 | -3.69260000 |
| C | -18.61970000 | 0.90330000  | 12.20250000 | N | -19.48570000 | 25.34060000 | -3.24300000 |
| N | -19.22250000 | -0.52200000 | 12.35070000 | C | -22.44540000 | 27.32810000 | -3.09440000 |



|   |              |             |              |   |              |             |              |
|---|--------------|-------------|--------------|---|--------------|-------------|--------------|
| C | -23.08860000 | 27.19790000 | -4.48290000  | C | -13.32930000 | 15.41650000 | -8.13830000  |
| O | -24.04870000 | 28.24210000 | -4.58990000  | N | -13.68050000 | 14.96290000 | -9.37850000  |
| C | -24.71080000 | 28.30920000 | -5.84580000  | N | -14.70060000 | 14.10560000 | -9.29350000  |
| C | -25.51900000 | 29.61450000 | -5.88120000  | N | -15.01590000 | 14.00960000 | -7.94830000  |
| C | -27.61490000 | 30.99350000 | -8.60770000  | C | -13.08260000 | 15.28010000 | -10.66460000 |
| N | -28.24740000 | 32.37260000 | -8.91610000  | C | -12.35390000 | 14.05630000 | -11.23880000 |
| C | -28.81950000 | 32.51150000 | -10.34560000 | O | -11.71960000 | 14.45150000 | -12.44910000 |
| C | -29.80730000 | 33.68290000 | -10.21520000 | C | -10.93830000 | 13.42390000 | -13.04840000 |
| C | -30.46550000 | 33.46460000 | -8.83840000  | C | -10.28090000 | 13.96160000 | -14.32870000 |
| C | -29.38460000 | 32.80610000 | -7.96040000  | C | -7.88690000  | 12.18280000 | -16.53850000 |
| C | -27.76800000 | 32.71550000 | -11.45290000 | N | -7.47860000  | 12.28020000 | -18.03150000 |
| O | -26.86720000 | 33.69970000 | -10.97850000 | C | -6.38800000  | 13.31600000 | -18.40260000 |
| O | -30.98290000 | 34.62980000 | -8.22310000  | C | -5.87360000  | 12.79810000 | -19.75640000 |
| O | -30.70560000 | 33.71990000 | -11.31150000 | C | -5.85300000  | 11.26410000 | -19.60410000 |
| C | -21.69110000 | 20.86030000 | -6.59630000  | C | -6.97390000  | 10.93180000 | -18.60220000 |
| C | -22.79990000 | 20.45230000 | -7.32630000  | C | -6.82970000  | 14.79270000 | -18.45950000 |
| N | -23.31300000 | 21.59740000 | -7.87430000  | O | -8.08860000  | 14.83830000 | -19.11040000 |
| N | -22.56340000 | 22.65190000 | -7.54100000  | O | -6.02610000  | 10.55380000 | -20.81770000 |
| N | -21.53080000 | 22.16550000 | -6.76190000  | O | -4.63240000  | 13.38700000 | -20.10310000 |
| C | -24.53260000 | 21.77030000 | -8.65180000  | O | -3.88230000  | 9.10650000  | -4.58840000  |
| C | -24.30090000 | 22.59590000 | -9.92990000  | C | -3.10290000  | 7.93780000  | -4.78150000  |
| O | -25.57930000 | 22.89210000 | -10.47890000 | O | -9.43940000  | 12.95960000 | -14.89820000 |
| C | -25.55210000 | 23.66940000 | -11.66890000 | C | -8.77940000  | 13.35620000 | -16.09010000 |
| C | -26.98080000 | 24.17460000 | -11.94450000 | O | -18.70740000 | 15.49560000 | -17.87480000 |
| C | -27.71040000 | 25.04180000 | -15.48930000 | C | -18.65020000 | 16.54150000 | -18.83440000 |
| N | -26.71220000 | 26.13630000 | -15.94780000 | O | -24.10400000 | 12.84540000 | -16.47750000 |
| C | -27.21640000 | 27.01760000 | -17.12360000 | C | -23.94040000 | 11.97930000 | -17.58860000 |
| C | -26.51760000 | 28.39450000 | -16.92030000 | O | -27.09640000 | 24.93670000 | -13.15070000 |
| C | -25.54660000 | 28.20320000 | -15.72860000 | C | -27.15680000 | 24.16620000 | -14.34640000 |
| C | -26.26080000 | 27.15260000 | -14.88130000 | O | -30.65160000 | 28.36390000 | 1.29170000   |
| C | -27.03080000 | 26.41190000 | -18.52820000 | C | -32.04610000 | 28.61830000 | 1.25550000   |
| O | -25.67550000 | 26.03400000 | -18.64130000 | C | -26.88800000 | 30.99640000 | -7.25190000  |
| O | -24.27110000 | 27.69730000 | -16.10390000 | O | -26.22660000 | 29.74950000 | -7.11360000  |
| O | -27.47150000 | 29.41500000 | -16.64790000 | O | -3.71120000  | 15.18990000 | 8.65690000   |
| C | -21.41480000 | 15.05420000 | -7.71900000  | C | -2.47260000  | 14.90120000 | 9.28050000   |
| C | -21.12880000 | 14.06520000 | -8.65630000  | O | -26.13930000 | 17.15090000 | 13.92420000  |
| N | -21.56590000 | 14.55610000 | -9.85790000  | C | -26.26560000 | 16.85290000 | 15.29760000  |
| N | -22.12830000 | 15.75490000 | -9.69020000  | C | -20.70340000 | 14.02530000 | 19.51370000  |
| N | -22.04900000 | 16.04010000 | -8.33870000  | O | -21.08700000 | 14.58130000 | 18.26190000  |
| C | -21.39330000 | 13.97690000 | -11.18580000 | O | -14.26790000 | 7.66980000  | 13.40830000  |
| C | -22.63220000 | 14.15430000 | -12.08060000 | C | -13.51030000 | 6.96850000  | 14.38010000  |
| O | -22.37040000 | 13.49020000 | -13.31260000 | O | -17.97520000 | 2.67550000  | 10.74510000  |
| C | -23.42210000 | 13.59910000 | -14.26530000 | C | -18.49620000 | 1.35480000  | 10.73540000  |
| C | -23.07600000 | 12.74070000 | -15.49250000 | H | -12.80320000 | 13.81450000 | -1.01460000  |
| C | -25.12680000 | 12.21700000 | -18.54370000 | H | -12.48780000 | 14.39740000 | 0.59080000   |
| N | -25.10030000 | 11.25510000 | -19.75810000 | H | -11.01360000 | 11.65100000 | -1.58940000  |
| C | -26.32150000 | 11.39650000 | -20.71620000 | H | -7.89460000  | 10.52320000 | -0.03810000  |
| C | -25.70930000 | 11.45240000 | -22.14480000 | H | -8.96420000  | 10.15840000 | -1.39010000  |
| C | -24.31920000 | 10.80380000 | -21.98840000 | H | -6.57560000  | 12.10370000 | -1.50410000  |
| C | -23.85170000 | 11.39350000 | -20.65760000 | H | -7.67830000  | 11.76070000 | -2.85040000  |
| C | -27.43110000 | 10.33200000 | -20.56170000 | H | -5.99390000  | 10.61320000 | -4.21030000  |
| O | -28.45810000 | 10.63300000 | -21.48130000 | H | -4.82570000  | 11.19030000 | -3.03070000  |
| O | -24.36660000 | 9.38500000  | -21.87970000 | H | -5.40690000  | 8.22730000  | -3.50510000  |
| O | -25.58790000 | 12.79450000 | -22.59860000 | H | -4.11020000  | 8.88810000  | -2.52530000  |
| C | -15.90410000 | 18.38990000 | -7.91830000  | H | -2.84840000  | 5.49030000  | -6.63740000  |
| C | -16.70100000 | 18.27770000 | -9.20840000  | H | 0.02840000   | 4.52600000  | -6.86560000  |
| C | -16.76490000 | 17.23860000 | -10.12830000 | H | -1.64670000  | 5.77910000  | -9.04820000  |
| N | -17.75760000 | 17.59380000 | -10.99870000 | H | -1.03360000  | 7.92730000  | -8.29040000  |
| N | -18.18240000 | 18.83140000 | -10.74630000 | H | 0.44100000   | 7.34190000  | -7.46940000  |
| N | -17.49380000 | 19.25380000 | -9.62250000  | H | -2.57040000  | 5.15660000  | -4.24270000  |
| C | -18.36610000 | 16.79910000 | -12.04970000 | H | -1.79840000  | 3.75030000  | -4.93800000  |
| C | -18.02050000 | 17.33900000 | -13.44120000 | H | -0.35170000  | 4.73140000  | -3.50180000  |
| O | -18.70990000 | 16.51180000 | -14.37000000 | H | 0.36180000   | 5.97870000  | -10.07460000 |
| C | -18.32630000 | 16.68430000 | -15.72600000 | H | -0.96600000  | 3.07060000  | -8.32620000  |
| C | -19.27080000 | 15.84400000 | -16.60890000 | H | -3.12880000  | 7.96060000  | -6.97630000  |
| C | -17.96950000 | 16.01130000 | -20.11470000 | H | -1.88370000  | 8.99620000  | -6.24560000  |
| N | -18.78620000 | 14.87880000 | -20.79410000 | H | -10.54650000 | 16.45010000 | 1.05600000   |
| C | -18.23540000 | 14.43190000 | -22.16700000 | H | -10.22540000 | 18.12640000 | 0.74670000   |
| C | -18.88750000 | 13.05550000 | -22.37740000 | H | -8.15940000  | 15.35140000 | 2.14230000   |
| C | -18.92490000 | 12.40890000 | -20.97710000 | H | -5.42500000  | 16.73320000 | 4.16090000   |
| C | -18.95320000 | 13.57530000 | -19.97480000 | H | -6.05130000  | 15.18260000 | 3.59620000   |
| C | -18.48730000 | 15.41140000 | -23.33200000 | H | -7.45840000  | 14.97010000 | 5.65000000   |
| O | -19.85280000 | 15.79060000 | -23.26930000 | H | -6.88890000  | 16.54160000 | 6.23460000   |
| O | -19.99900000 | 11.49790000 | -20.77550000 | H | -6.24760000  | 15.17340000 | 8.15110000   |
| O | -18.18490000 | 12.30690000 | -23.35330000 | H | -6.37000000  | 13.60420000 | 7.37150000   |
| C | -14.30310000 | 14.93190000 | -5.74560000  | H | -3.78920000  | 13.50000000 | 7.44430000   |
| C | -14.20450000 | 14.79750000 | -7.25530000  | H | -4.62390000  | 13.36290000 | 8.98510000   |

|   |              |             |             |   |              |             |              |
|---|--------------|-------------|-------------|---|--------------|-------------|--------------|
| H | 0.73360000   | 15.88520000 | 9.53050000  | H | -22.59060000 | 11.28030000 | 25.03900000  |
| H | 1.36680000   | 15.33900000 | 12.46250000 | H | -22.93740000 | 13.87920000 | 26.07340000  |
| H | 1.37470000   | 18.01230000 | 11.03470000 | H | -21.31030000 | 15.79250000 | 20.63990000  |
| H | -1.01770000  | 17.19380000 | 12.69190000 | H | -22.61400000 | 14.60500000 | 20.43270000  |
| H | -0.91990000  | 18.15220000 | 11.18720000 | H | -22.50930000 | 16.38240000 | 3.49750000   |
| H | 1.59660000   | 13.51410000 | 10.29180000 | H | -21.17800000 | 15.67420000 | 4.36380000   |
| H | 0.09260000   | 13.54130000 | 9.40510000  | H | -21.78960000 | 14.94320000 | 7.21310000   |
| H | 0.05480000   | 12.36460000 | 11.47730000 | H | -25.02400000 | 14.08940000 | 8.72560000   |
| H | 2.32770000   | 18.23660000 | 13.01990000 | H | -23.30700000 | 14.24210000 | 9.12540000   |
| H | 3.43940000   | 15.93260000 | 11.86860000 | H | -25.33600000 | 16.55040000 | 9.19390000   |
| H | -1.47820000  | 16.86240000 | 9.06870000  | H | -23.62030000 | 16.69000000 | 9.60550000   |
| H | -2.71360000  | 16.77850000 | 10.33740000 | H | -24.55150000 | 17.52290000 | 11.72760000  |
| H | -14.01900000 | 16.28260000 | 5.96820000  | H | -26.19330000 | 17.01910000 | 11.35510000  |
| H | -15.60570000 | 15.67300000 | 5.65000000  | H | -24.43570000 | 15.97420000 | 13.62180000  |
| H | -12.66680000 | 13.26450000 | 7.12470000  | H | -25.96480000 | 15.23340000 | 13.17400000  |
| H | -12.43490000 | 11.95450000 | 9.27200000  | H | -25.49260000 | 18.54110000 | 17.65250000  |
| H | -13.12360000 | 12.84570000 | 10.62710000 | H | -26.18670000 | 18.63010000 | 20.40050000  |
| H | -14.46410000 | 10.50770000 | 9.13840000  | H | -28.71830000 | 19.36140000 | 20.01460000  |
| H | -15.23540000 | 11.43430000 | 10.44130000 | H | -28.62450000 | 19.40070000 | 17.57300000  |
| H | -15.21410000 | 9.71020000  | 12.10310000 | H | -29.49270000 | 17.86360000 | 17.88280000  |
| H | -14.78180000 | 8.59610000  | 10.81200000 | H | -24.88060000 | 16.21300000 | 17.93170000  |
| H | -12.92370000 | 9.21540000  | 13.15790000 | H | -24.55360000 | 17.01130000 | 19.45460000  |
| H | -12.74440000 | 7.90800000  | 12.00190000 | H | -25.83030000 | 14.99320000 | 19.59070000  |
| H | -12.82360000 | 6.77560000  | 17.28530000 | H | -27.78240000 | 16.66540000 | 20.07010000  |
| H | -12.20890000 | 4.70060000  | 19.12150000 | H | -26.64180000 | 20.79220000 | 19.87920000  |
| H | -14.60540000 | 3.53790000  | 19.02890000 | H | -26.94250000 | 18.89810000 | 15.77180000  |
| H | -15.58990000 | 5.10180000  | 17.43430000 | H | -28.25230000 | 17.73460000 | 15.48200000  |
| H | -15.28460000 | 3.66430000  | 16.40530000 | H | -22.08390000 | 22.02100000 | 2.78100000   |
| H | -10.55470000 | 5.64140000  | 17.54910000 | H | -21.22220000 | 22.60830000 | 1.39290000   |
| H | -11.00070000 | 5.98900000  | 15.89030000 | H | -25.07850000 | 22.05340000 | 2.57340000   |
| H | -10.27680000 | 3.79440000  | 16.21220000 | H | -27.23850000 | 23.17020000 | 1.94670000   |
| H | -12.42870000 | 2.95300000  | 17.29620000 | H | -27.32780000 | 23.47770000 | 0.21310000   |
| H | -13.77340000 | 5.71330000  | 20.29910000 | H | -26.63250000 | 25.86190000 | 0.59190000   |
| H | -14.95120000 | 7.03770000  | 16.04260000 | H | -26.51240000 | 25.56510000 | 2.33350000   |
| H | -15.29420000 | 5.79910000  | 14.81740000 | H | -28.27660000 | 27.39060000 | 2.45980000   |
| H | -15.33540000 | 11.58210000 | 4.58820000  | H | -28.40950000 | 27.38010000 | 0.70850000   |
| H | -15.74820000 | 12.70550000 | 5.83540000  | H | -30.63230000 | 26.84080000 | 2.72630000   |
| H | -17.28210000 | 9.02370000  | 4.83690000  | H | -30.76090000 | 26.31780000 | 1.05420000   |
| H | -17.77690000 | 6.96590000  | 6.26180000  | H | -33.84210000 | 30.90930000 | 2.14170000   |
| H | -18.92120000 | 7.64710000  | 7.41630000  | H | -36.20700000 | 32.16100000 | 1.29300000   |
| H | -17.32070000 | 7.28560000  | 9.28420000  | H | -35.40910000 | 32.83040000 | -1.13150000  |
| H | -16.08030000 | 6.70430000  | 8.15950000  | H | -33.96850000 | 30.62850000 | -1.94390000  |
| H | -16.31070000 | 4.66240000  | 9.71980000  | H | -33.15550000 | 31.91290000 | -0.99580000  |
| H | -17.80480000 | 5.24820000  | 10.43610000 | H | -36.33310000 | 30.08280000 | 2.52180000   |
| H | -17.46800000 | 2.74130000  | 8.71810000  | H | -35.01860000 | 28.92820000 | 0.56150000   |
| H | -19.03680000 | 3.40910000  | 9.13280000  | H | -36.78310000 | 29.40670000 | 2.38880000   |
| H | -17.34410000 | -1.21230000 | 11.65630000 | H | -36.66600000 | 31.23490000 | -1.96820000  |
| H | -19.09020000 | -3.40840000 | 12.80010000 | H | -34.59510000 | 33.43470000 | 2.08190000   |
| H | -17.47250000 | -1.43190000 | 14.42770000 | H | -31.80430000 | 30.77760000 | 0.85080000   |
| H | -19.38650000 | 0.01860000  | 14.46280000 | H | -31.79230000 | 29.74050000 | -0.58640000  |
| H | -20.47530000 | -1.26970000 | 13.89570000 | H | -22.05010000 | 25.20490000 | -1.23050000  |
| H | -19.76440000 | -2.68560000 | 10.44880000 | H | -23.19080000 | 27.17680000 | -2.31360000  |
| H | -18.77720000 | -1.49060000 | 9.62250000  | H | -22.01370000 | 28.31970000 | -2.95810000  |
| H | -18.05530000 | -3.62670000 | 9.16850000  | H | -23.57450000 | 26.26200000 | -4.59460000  |
| H | -18.15890000 | -3.39700000 | 15.47010000 | H | -22.33830000 | 27.30360000 | -5.26970000  |
| H | -16.97030000 | -3.87110000 | 11.95750000 | H | -23.99630000 | 28.30020000 | -6.67130000  |
| H | -17.65490000 | 0.89740000  | 12.71400000 | H | -25.36800000 | 27.44790000 | -5.97610000  |
| H | -19.29490000 | 1.57010000  | 12.74290000 | H | -24.83550000 | 30.45410000 | -5.73740000  |
| H | -17.76280000 | 16.01680000 | 7.81690000  | H | -26.21860000 | 29.63160000 | -5.04340000  |
| H | -18.82910000 | 17.38060000 | 7.92380000  | H | -29.37710000 | 31.58940000 | -10.52800000 |
| H | -17.82920000 | 14.59740000 | 10.28600000 | H | -29.24020000 | 34.61770000 | -10.18050000 |
| H | -20.28940000 | 13.08770000 | 12.22120000 | H | -31.27460000 | 32.73960000 | -8.95900000  |
| H | -18.70670000 | 13.79590000 | 12.54140000 | H | -29.76560000 | 31.91700000 | -7.45490000  |
| H | -21.41760000 | 15.02190000 | 13.32800000 | H | -28.92890000 | 33.48320000 | -7.23480000  |
| H | -19.85930000 | 15.83000000 | 13.55810000 | H | -28.23190000 | 33.02890000 | -12.39180000 |
| H | -20.43600000 | 15.82400000 | 15.93380000 | H | -27.22450000 | 31.79140000 | -11.65980000 |
| H | -21.84960000 | 14.80440000 | 15.72790000 | H | -26.27220000 | 33.96980000 | -11.69200000 |
| H | -19.31740000 | 14.06600000 | 17.28010000 | H | -31.78010000 | 34.92960000 | -8.67670000  |
| H | -20.66330000 | 12.97210000 | 17.02450000 | H | -31.12110000 | 34.58950000 | -11.37420000 |
| H | -22.99000000 | 15.15890000 | 22.77120000 | H | -26.91050000 | 30.80250000 | -9.41840000  |
| H | -21.10620000 | 13.88270000 | 24.79440000 | H | -28.41330000 | 30.25100000 | -8.65380000  |
| H | -23.42670000 | 12.53900000 | 23.38810000 | H | -23.26750000 | 19.48940000 | -7.45510000  |
| H | -22.25490000 | 12.36120000 | 21.41990000 | H | -25.25470000 | 22.26570000 | -8.00240000  |
| H | -20.67330000 | 12.15040000 | 22.22820000 | H | -24.92940000 | 20.78520000 | -8.89810000  |
| H | -21.72210000 | 16.67240000 | 24.49700000 | H | -23.69970000 | 22.03310000 | -10.64660000 |
| H | -21.48010000 | 17.06190000 | 22.80060000 | H | -23.78530000 | 23.53230000 | -9.70670000  |
| H | -19.49380000 | 16.77110000 | 24.11960000 | H | -24.87710000 | 24.52290000 | -11.57740000 |

|   |              |             |              |   |                         |             |              |
|---|--------------|-------------|--------------|---|-------------------------|-------------|--------------|
| H | -25.18930000 | 23.05780000 | -12.49570000 | H | -6.09830000             | 15.40150000 | -18.99720000 |
| H | -27.28370000 | 24.81780000 | -11.11750000 | H | -6.90950000             | 15.22930000 | -17.46360000 |
| H | -27.68970000 | 23.34420000 | -11.93330000 | H | -8.28000000             | 15.75450000 | -19.35530000 |
| H | -28.28700000 | 27.12690000 | -16.93610000 | H | -5.18910000             | 10.49070000 | -21.29370000 |
| H | -25.94040000 | 28.69420000 | -17.79840000 | H | -4.44860000             | 13.24730000 | -21.04020000 |
| H | -25.41940000 | 29.13520000 | -15.17340000 | H | -6.97580000             | 12.08140000 | -15.94640000 |
| H | -27.14910000 | 27.53260000 | -14.37330000 | H | -8.45010000             | 11.24950000 | -16.46770000 |
| H | -25.59970000 | 26.64100000 | -14.17990000 | H | -2.36320000             | 7.84680000  | -3.98420000  |
| H | -27.66690000 | 25.53530000 | -18.66870000 | H | -3.73700000             | 7.05090000  | -4.75210000  |
| H | -27.29890000 | 27.12730000 | -19.30960000 | H | -9.51770000             | 13.59500000 | -16.85830000 |
| H | -25.49110000 | 25.73600000 | -19.54240000 | H | -8.18160000             | 14.25010000 | -15.91210000 |
| H | -23.74240000 | 28.38530000 | -16.52670000 | H | -19.65750000            | 16.89620000 | -19.05980000 |
| H | -27.88870000 | 29.70950000 | -17.46710000 | H | -18.08240000            | 17.38890000 | -18.44610000 |
| H | -27.90580000 | 24.44600000 | -16.38210000 | H | -22.99180000            | 12.18430000 | -18.08900000 |
| H | -28.62260000 | 25.56230000 | -15.19300000 | H | -23.91950000            | 10.93790000 | -17.26060000 |
| H | -20.30120000 | 14.37480000 | -5.96060000  | H | -26.16680000            | 23.78110000 | -14.59580000 |
| H | -21.90960000 | 14.92040000 | -5.62900000  | H | -27.81720000            | 23.30560000 | -14.21940000 |
| H | -20.61070000 | 13.12320000 | -8.58480000  | H | -32.59020000            | 27.78370000 | 0.80710000   |
| H | -20.52580000 | 14.45650000 | -11.63870000 | H | -32.43270000            | 28.75590000 | 2.26670000   |
| H | -21.16430000 | 12.91800000 | -11.06480000 | H | -27.59600000            | 31.14880000 | -6.43490000  |
| H | -22.82300000 | 15.21330000 | -12.26840000 | H | -26.16500000            | 31.81420000 | -7.21420000  |
| H | -23.51410000 | 13.72140000 | -11.60360000 | H | -2.62030000             | 14.17910000 | 10.08630000  |
| H | -24.36920000 | 13.26180000 | -13.83960000 | H | -1.78190000             | 14.46420000 | 8.55880000   |
| H | -23.55640000 | 14.64030000 | -14.56410000 | H | -26.62540000            | 15.83300000 | 15.44940000  |
| H | -22.94650000 | 11.70370000 | -15.17640000 | H | -25.28400000            | 16.92960000 | 15.76600000  |
| H | -22.12140000 | 13.06650000 | -15.90980000 | H | -20.87920000            | 12.94780000 | 19.51600000  |
| H | -26.76510000 | 12.36670000 | -20.47810000 | H | -19.63840000            | 14.18150000 | 19.69800000  |
| H | -26.29420000 | 10.89400000 | -22.87960000 | H | -12.89780000            | 6.21310000  | 13.88430000  |
| H | -23.65720000 | 11.09850000 | -22.80600000 | H | -12.83540000            | 7.63560000  | 14.92000000  |
| H | -23.60440000 | 12.45430000 | -20.73870000 | H | -19.47410000            | 1.32150000  | 10.25030000  |
| H | -23.03150000 | 10.84520000 | -20.19130000 | H | -17.82800000            | 0.70000000  | 10.17370000  |
| H | -27.83890000 | 10.33780000 | -19.54850000 |   |                         |             |              |
| H | -27.05090000 | 9.32560000  | -20.75180000 |   | 1 2 1.5 6 1.5 7 1.0     |             |              |
| H | -29.21650000 | 10.04970000 | -21.34380000 |   | 2 3 1.5 97 1.0          |             |              |
| H | -24.45420000 | 8.99010000  | -22.75810000 |   | 3 4 1.5 47 1.0          |             |              |
| H | -26.45550000 | 13.10780000 | -22.89060000 |   | 4 5 1.5 59 1.0          |             |              |
| H | -26.07840000 | 12.02920000 | -18.04260000 |   | 5 6 1.5 8 1.0           |             |              |
| H | -25.13590000 | 13.23290000 | -18.94390000 |   | 6 98 1.0                |             |              |
| H | -16.22120000 | 19.25060000 | -7.32400000  |   | 7 60 1.0 61 1.0 62 1.0  |             |              |
| H | -14.85540000 | 18.57830000 | -8.14690000  |   | 8 11 1.0 63 1.0 64 1.0  |             |              |
| H | -16.29660000 | 16.26880000 | -10.16290000 |   | 9 10 1.5 14 1.5 15 1.0  |             |              |
| H | -18.02420000 | 15.76980000 | -11.94230000 |   | 10 11 1.5 99 1.0        |             |              |
| H | -19.44440000 | 16.80730000 | -11.88500000 |   | 11 12 1.5               |             |              |
| H | -16.94170000 | 17.29190000 | -13.60670000 |   | 12 13 1.5 65 1.0        |             |              |
| H | -18.34830000 | 18.37380000 | -13.56010000 |   | 13 14 1.5 16 1.0        |             |              |
| H | -18.35640000 | 17.73360000 | -16.02430000 |   | 14 49 1.0               |             |              |
| H | -17.29890000 | 16.33760000 | -15.84890000 |   | 15 66 1.0 67 1.0 68 1.0 |             |              |
| H | -20.24470000 | 16.32540000 | -16.71200000 |   | 16 19 1.0 69 1.0 70 1.0 |             |              |
| H | -19.46540000 | 14.89800000 | -16.10160000 |   | 17 18 1.5 22 1.5 23 1.0 |             |              |
| H | -17.16040000 | 14.30160000 | -22.01850000 |   | 18 19 1.5 50 1.0        |             |              |
| H | -19.91780000 | 13.21040000 | -22.70930000 |   | 19 20 1.5               |             |              |
| H | -17.97850000 | 11.88330000 | -20.82300000 |   | 20 21 1.5 71 1.0        |             |              |
| H | -18.11550000 | 13.50890000 | -19.27770000 |   | 21 22 1.5 30 1.0        |             |              |
| H | -19.89070000 | 13.67270000 | -19.42520000 |   | 22 51 1.0               |             |              |
| H | -17.85610000 | 16.29900000 | -23.24980000 |   | 23 72 1.0 73 1.0 74 1.0 |             |              |
| H | -18.25640000 | 14.94980000 | -24.29580000 |   | 24 25 1.5 29 1.5 31 1.0 |             |              |
| H | -20.06950000 | 16.30620000 | -24.06030000 |   | 25 26 1.5 100 1.0       |             |              |
| H | -19.70630000 | 10.61310000 | -21.03050000 |   | 26 27 1.5 30 1.0        |             |              |
| H | -18.73270000 | 11.58750000 | -23.68870000 |   | 27 28 1.5 75 1.0        |             |              |
| H | -17.88000000 | 16.80010000 | -20.86210000 |   | 28 29 1.5 48 1.0        |             |              |
| H | -16.98170000 | 15.59400000 | -19.91370000 |   | 29 101 1.0              |             |              |
| H | -13.88520000 | 14.04960000 | -5.26090000  |   | 30 76 1.0 77 1.0        |             |              |
| H | -15.34380000 | 15.00080000 | -5.42590000  |   | 31 78 1.0 79 1.0 80 1.0 |             |              |
| H | -12.53190000 | 16.12480000 | -7.98500000  |   | 32 33 1.5 37 1.5 38 1.0 |             |              |
| H | -12.38810000 | 16.10860000 | -10.52380000 |   | 33 34 1.5 102 1.0       |             |              |
| H | -13.87500000 | 15.61610000 | -11.33360000 |   | 34 35 1.5 48 1.0        |             |              |
| H | -13.05860000 | 13.24620000 | -11.44020000 |   | 35 36 1.5 81 1.0        |             |              |
| H | -11.60750000 | 13.69470000 | -10.52760000 |   | 36 37 1.5 39 1.0        |             |              |
| H | -10.16410000 | 13.08430000 | -12.35760000 |   | 37 52 1.0               |             |              |
| H | -11.55800000 | 12.55730000 | -13.28650000 |   | 38 82 1.0 83 1.0 84 1.0 |             |              |
| H | -9.69970000  | 14.85440000 | -14.08990000 |   | 39 42 1.0 85 1.0 86 1.0 |             |              |
| H | -11.05470000 | 14.26490000 | -15.03640000 |   | 40 41 1.5 45 1.5 46 1.0 |             |              |
| H | -5.60540000  | 13.19430000 | -17.65030000 |   | 41 42 1.5 103 1.0       |             |              |
| H | -6.61160000  | 13.05250000 | -20.52290000 |   | 42 43 1.5               |             |              |
| H | -4.90540000  | 10.97310000 | -19.14360000 |   | 43 44 1.5 87 1.0        |             |              |
| H | -7.84330000  | 10.44560000 | -19.05020000 |   | 44 45 1.5 47 1.0        |             |              |
| H | -6.59790000  | 10.32680000 | -17.77440000 |   | 45 104 1.0              |             |              |

|                                     |                                     |
|-------------------------------------|-------------------------------------|
| 46 88 1.0 89 1.0 90 1.0             | 123 395 1.0                         |
| 47 91 1.0 92 1.0                    | 124 396 1.0                         |
| 48 93 1.0 94 1.0                    | 125 397 1.0                         |
| 49 96 1.0                           | 126 127 1.0 400 1.0 401 1.0         |
| 50 56 1.0                           | 127 128 1.5 131 1.5                 |
| 51 53 1.0                           | 128 129 1.5 402 1.0                 |
| 52 95 1.0                           | 129 130 1.5 132 1.0                 |
| 53 54 1.0 55 1.0 251 1.0            | 130 131 1.5                         |
| 54                                  | 131                                 |
| 55                                  | 132 133 1.0 403 1.0 404 1.0         |
| 56 57 1.0 58 1.0 271 1.0            | 133 134 1.0 405 1.0 406 1.0         |
| 57                                  | 134 135 1.0                         |
| 58                                  | 135 136 1.0 407 1.0 408 1.0         |
| 59                                  | 136 367 1.0 409 1.0 410 1.0         |
| 60                                  | 137 138 1.0 368 1.0 421 1.0 422 1.0 |
| 61                                  | 138 139 1.0 142 1.0                 |
| 62                                  | 139 140 1.0 143 1.0 411 1.0         |
| 63                                  | 140 141 1.0 146 1.0 412 1.0         |
| 64                                  | 141 142 1.0 145 1.0 413 1.0         |
| 65                                  | 142 414 1.0 415 1.0                 |
| 66                                  | 143 144 1.0 416 1.0 417 1.0         |
| 67                                  | 144 418 1.0                         |
| 68                                  | 145 419 1.0                         |
| 69                                  | 146 420 1.0                         |
| 70                                  | 147 148 1.0 423 1.0 424 1.0         |
| 71                                  | 148 149 1.5 152 1.5                 |
| 72                                  | 149 150 1.5 425 1.0                 |
| 73                                  | 150 151 1.5 153 1.0                 |
| 74                                  | 151 152 1.5                         |
| 75                                  | 152                                 |
| 76                                  | 153 154 1.0 426 1.0 427 1.0         |
| 77                                  | 154 155 1.0 428 1.0 429 1.0         |
| 78                                  | 155 156 1.0                         |
| 79                                  | 156 157 1.0 430 1.0 431 1.0         |
| 80                                  | 157 373 1.0 432 1.0 433 1.0         |
| 81                                  | 158 159 1.0 374 1.0 444 1.0 445 1.0 |
| 82                                  | 159 160 1.0 163 1.0                 |
| 83                                  | 160 161 1.0 164 1.0 434 1.0         |
| 84                                  | 161 162 1.0 167 1.0 435 1.0         |
| 85                                  | 162 163 1.0 166 1.0 436 1.0         |
| 86                                  | 163 437 1.0 438 1.0                 |
| 87                                  | 164 165 1.0 439 1.0 440 1.0         |
| 88                                  | 165 441 1.0                         |
| 89                                  | 166 442 1.0                         |
| 90                                  | 167 443 1.0                         |
| 91                                  | 168 169 1.5 172 1.5                 |
| 92                                  | 169 170 1.5 448 1.0                 |
| 93                                  | 170 171 1.5 173 1.0                 |
| 94                                  | 171 172 1.5                         |
| 95 168 1.0 446 1.0 447 1.0          | 172                                 |
| 96 291 1.0 580 1.0 581 1.0          | 173 174 1.0 449 1.0 450 1.0         |
| 97 105 1.0                          | 174 175 1.0 451 1.0 452 1.0         |
| 98 332 1.0                          | 175 176 1.0                         |
| 99 311 1.0                          | 176 177 1.0 453 1.0 454 1.0         |
| 100 230 1.0                         | 177 375 1.0 455 1.0 456 1.0         |
| 101 209 1.0                         | 178 179 1.0 376 1.0 467 1.0 468 1.0 |
| 102 188 1.0                         | 179 180 1.0 183 1.0                 |
| 103 147 1.0                         | 180 181 1.0 184 1.0 457 1.0         |
| 104 126 1.0                         | 181 182 1.0 187 1.0 458 1.0         |
| 105 106 1.0 377 1.0 378 1.0         | 182 183 1.0 186 1.0 459 1.0         |
| 106 107 1.5 110 1.5                 | 183 460 1.0 461 1.0                 |
| 107 108 1.5 379 1.0                 | 184 185 1.0 462 1.0 463 1.0         |
| 108 109 1.5 111 1.0                 | 185 464 1.0                         |
| 109 110 1.5                         | 186 465 1.0                         |
| 110                                 | 187 466 1.0                         |
| 111 112 1.0 380 1.0 381 1.0         | 188 189 1.0 469 1.0 470 1.0         |
| 112 113 1.0 382 1.0 383 1.0         | 189 190 1.5 193 1.5                 |
| 113 114 1.0                         | 190 191 1.5 471 1.0                 |
| 114 115 1.0 384 1.0 385 1.0         | 191 192 1.5 194 1.0                 |
| 115 353 1.0 386 1.0 387 1.0         | 192 193 1.5                         |
| 116 117 1.0 354 1.0 398 1.0 399 1.0 | 193                                 |
| 117 118 1.0 121 1.0                 | 194 195 1.0 472 1.0 473 1.0         |
| 118 119 1.0 122 1.0 388 1.0         | 195 196 1.0 474 1.0 475 1.0         |
| 119 120 1.0 125 1.0 389 1.0         | 196 197 1.0                         |
| 120 121 1.0 124 1.0 390 1.0         | 197 198 1.0 476 1.0 477 1.0         |
| 121 391 1.0 392 1.0                 | 198 372 1.0 478 1.0 479 1.0         |
| 122 123 1.0 393 1.0 394 1.0         | 199 200 1.0 371 1.0 490 1.0 491 1.0 |

200 201 1.0 204 1.0  
201 202 1.0 205 1.0 480 1.0  
202 203 1.0 208 1.0 481 1.0  
203 204 1.0 207 1.0 482 1.0  
204 483 1.0 484 1.0  
205 206 1.0 485 1.0 486 1.0  
206 487 1.0  
207 488 1.0  
208 489 1.0  
209 210 1.0 492 1.0 493 1.0  
210 211 1.5 214 1.5  
211 212 1.5 494 1.0  
212 213 1.5 215 1.0  
213 214 1.5  
214  
215 216 1.0 495 1.0 496 1.0  
216 217 1.0 497 1.0 498 1.0  
217 218 1.0  
218 219 1.0 499 1.0 500 1.0  
219 369 1.0 501 1.0 502 1.0  
220 221 1.0 370 1.0 513 1.0 514 1.0  
221 222 1.0 225 1.0  
222 223 1.0 226 1.0 503 1.0  
223 224 1.0 229 1.0 504 1.0  
224 225 1.0 228 1.0 505 1.0  
225 506 1.0 507 1.0  
226 227 1.0 508 1.0 509 1.0  
227 510 1.0  
228 511 1.0  
229 512 1.0  
230 231 1.0 515 1.0 516 1.0  
231 232 1.5 235 1.5  
232 233 1.5 517 1.0  
233 234 1.5 236 1.0  
234 235 1.5  
235  
236 237 1.0 518 1.0 519 1.0  
237 238 1.0 520 1.0 521 1.0  
238 239 1.0  
239 240 1.0 522 1.0 523 1.0  
240 363 1.0 524 1.0 525 1.0  
241 242 1.0 364 1.0 536 1.0 537 1.0  
242 243 1.0 246 1.0  
243 244 1.0 247 1.0 526 1.0  
244 245 1.0 250 1.0 527 1.0  
245 246 1.0 249 1.0 528 1.0  
246 529 1.0 530 1.0  
247 248 1.0 531 1.0 532 1.0  
248 533 1.0  
249 534 1.0  
250 535 1.0  
251 252 1.5 255 1.5  
252 253 1.5 538 1.0  
253 254 1.5 256 1.0  
254 255 1.5  
255  
256 257 1.0 539 1.0 540 1.0  
257 258 1.0 541 1.0 542 1.0  
258 259 1.0  
259 260 1.0 543 1.0 544 1.0  
260 366 1.0 545 1.0 546 1.0  
261 262 1.0 365 1.0 557 1.0 558 1.0  
262 263 1.0 266 1.0  
263 264 1.0 267 1.0 547 1.0  
264 265 1.0 270 1.0 548 1.0  
265 266 1.0 269 1.0 549 1.0  
266 550 1.0 551 1.0  
267 268 1.0 552 1.0 553 1.0  
268 554 1.0  
269 555 1.0  
270 556 1.0  
271 272 1.5 275 1.5  
272 273 1.5 559 1.0  
273 274 1.5 276 1.0  
274 275 1.5  
275  
276 277 1.0 560 1.0 561 1.0

277 278 1.0 562 1.0 563 1.0  
278 279 1.0  
279 280 1.0 564 1.0 565 1.0  
280 361 1.0 566 1.0 567 1.0  
281 282 1.0 362 1.0 578 1.0 579 1.0  
282 283 1.0 286 1.0  
283 284 1.0 287 1.0 568 1.0  
284 285 1.0 290 1.0 569 1.0  
285 286 1.0 289 1.0 570 1.0  
286 571 1.0 572 1.0  
287 288 1.0 573 1.0 574 1.0  
288 575 1.0  
289 576 1.0  
290 577 1.0  
291 292 1.5 295 1.5  
292 293 1.5 582 1.0  
293 294 1.5 296 1.0  
294 295 1.5  
295  
296 297 1.0 583 1.0 584 1.0  
297 298 1.0 585 1.0 586 1.0  
298 299 1.0  
299 300 1.0 587 1.0 588 1.0  
300 359 1.0 589 1.0 590 1.0  
301 302 1.0 360 1.0 601 1.0 602 1.0  
302 303 1.0 306 1.0  
303 304 1.0 307 1.0 591 1.0  
304 305 1.0 310 1.0 592 1.0  
305 306 1.0 309 1.0 593 1.0  
306 594 1.0 595 1.0  
307 308 1.0 596 1.0 597 1.0  
308 598 1.0  
309 599 1.0  
310 600 1.0  
311 312 1.0 603 1.0 604 1.0  
312 313 1.5 316 1.5  
313 314 1.5 605 1.0  
314 315 1.5 317 1.0  
315 316 1.5  
316  
317 318 1.0 606 1.0 607 1.0  
318 319 1.0 608 1.0 609 1.0  
319 320 1.0  
320 321 1.0 610 1.0 611 1.0  
321 357 1.0 612 1.0 613 1.0  
322 323 1.0 358 1.0 624 1.0 625 1.0  
323 324 1.0 327 1.0  
324 325 1.0 328 1.0 614 1.0  
325 326 1.0 331 1.0 615 1.0  
326 327 1.0 330 1.0 616 1.0  
327 617 1.0 618 1.0  
328 329 1.0 619 1.0 620 1.0  
329 621 1.0  
330 622 1.0  
331 623 1.0  
332 333 1.0 626 1.0 627 1.0  
333 334 1.5 337 1.5  
334 335 1.5 628 1.0  
335 336 1.5 338 1.0  
336 337 1.5  
337  
338 339 1.0 629 1.0 630 1.0  
339 340 1.0 631 1.0 632 1.0  
340 341 1.0  
341 342 1.0 633 1.0 634 1.0  
342 355 1.0 635 1.0 636 1.0  
343 344 1.0 356 1.0 647 1.0 648 1.0  
344 345 1.0 348 1.0  
345 346 1.0 349 1.0 637 1.0  
346 347 1.0 352 1.0 638 1.0  
347 348 1.0 351 1.0 639 1.0  
348 640 1.0 641 1.0  
349 350 1.0 642 1.0 643 1.0  
350 644 1.0  
351 645 1.0  
352 646 1.0  
353 354 1.0

|                             |     |
|-----------------------------|-----|
| 354 649 1.0 650 1.0         | 431 |
| 355 356 1.0                 | 432 |
| 356 651 1.0 652 1.0         | 433 |
| 357 358 1.0                 | 434 |
| 358 653 1.0 654 1.0         | 435 |
| 359 360 1.0                 | 436 |
| 360 655 1.0 656 1.0         | 437 |
| 361 362 1.0                 | 438 |
| 362 657 1.0 658 1.0         | 439 |
| 363 364 1.0                 | 440 |
| 364 659 1.0 660 1.0         | 441 |
| 365 366 1.0 661 1.0 662 1.0 | 442 |
| 366                         | 443 |
| 367 368 1.0                 | 444 |
| 368 663 1.0 664 1.0         | 445 |
| 369 370 1.0                 | 446 |
| 370 665 1.0 666 1.0         | 447 |
| 371 372 1.0 667 1.0 668 1.0 | 448 |
| 372                         | 449 |
| 373 374 1.0                 | 450 |
| 374 669 1.0 670 1.0         | 451 |
| 375 376 1.0                 | 452 |
| 376 671 1.0 672 1.0         | 453 |
| 377                         | 454 |
| 378                         | 455 |
| 379                         | 456 |
| 380                         | 457 |
| 381                         | 458 |
| 382                         | 459 |
| 383                         | 460 |
| 384                         | 461 |
| 385                         | 462 |
| 386                         | 463 |
| 387                         | 464 |
| 388                         | 465 |
| 389                         | 466 |
| 390                         | 467 |
| 391                         | 468 |
| 392                         | 469 |
| 393                         | 470 |
| 394                         | 471 |
| 395                         | 472 |
| 396                         | 473 |
| 397                         | 474 |
| 398                         | 475 |
| 399                         | 476 |
| 400                         | 477 |
| 401                         | 478 |
| 402                         | 479 |
| 403                         | 480 |
| 404                         | 481 |
| 405                         | 482 |
| 406                         | 483 |
| 407                         | 484 |
| 408                         | 485 |
| 409                         | 486 |
| 410                         | 487 |
| 411                         | 488 |
| 412                         | 489 |
| 413                         | 490 |
| 414                         | 491 |
| 415                         | 492 |
| 416                         | 493 |
| 417                         | 494 |
| 418                         | 495 |
| 419                         | 496 |
| 420                         | 497 |
| 421                         | 498 |
| 422                         | 499 |
| 423                         | 500 |
| 424                         | 501 |
| 425                         | 502 |
| 426                         | 503 |
| 427                         | 504 |
| 428                         | 505 |
| 429                         | 506 |
| 430                         | 507 |

508  
509  
510  
511  
512  
513  
514  
515  
516  
517  
518  
519  
520  
521  
522  
523  
524  
525  
526  
527  
528  
529  
530  
531  
532  
533  
534  
535  
536  
537  
538  
539  
540  
541  
542  
543  
544  
545  
546  
547  
548  
549  
550  
551  
552  
553  
554  
555  
556  
557  
558  
559  
560  
561  
562  
563  
564  
565  
566  
567  
568  
569  
570  
571  
572  
573  
574  
575  
576  
577  
578  
579  
580  
581  
582  
583  
584

585  
586  
587  
588  
589  
590  
591  
592  
593  
594  
595  
596  
597  
598  
599  
600  
601  
602  
603  
604  
605  
606  
607  
608  
609  
610  
611  
612  
613  
614  
615  
616  
617  
618  
619  
620  
621  
622  
623  
624  
625  
626  
627  
628  
629  
630  
631  
632  
633  
634  
635  
636  
637  
638  
639  
640  
641  
642  
643  
644  
645  
646  
647  
648  
649  
650  
651  
652  
653  
654  
655  
656  
657  
658  
659  
660  
661

662  
663  
664  
665  
666  
667

668  
669  
670  
671  
672



## Molecular Dynamics of Ligand-Protein Complexes

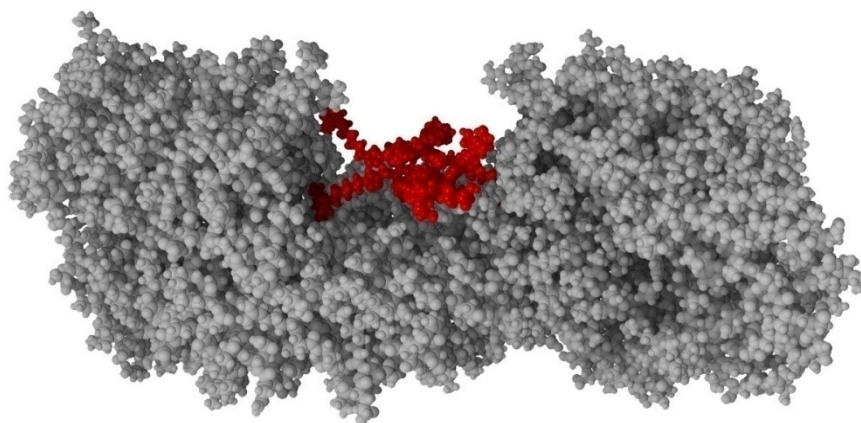

**Figure S34:** Lowest energy structure of the complex  $3a@(LH)_2$

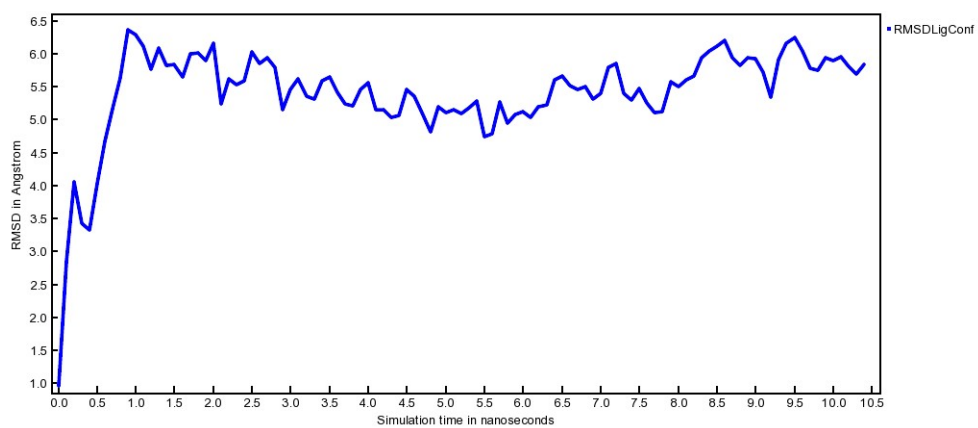

**Figure S35:** Variation of RMSD values calculated for the conformation  $3a$  during the MD simulation with respect to its starting conformation to summarize conformational changes.

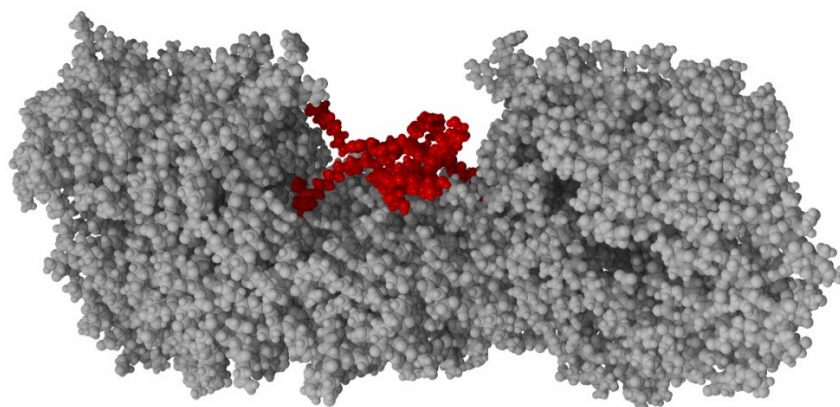

**Figure S36:** Lowest energy structure of the complex  $4a@(LH)_2$

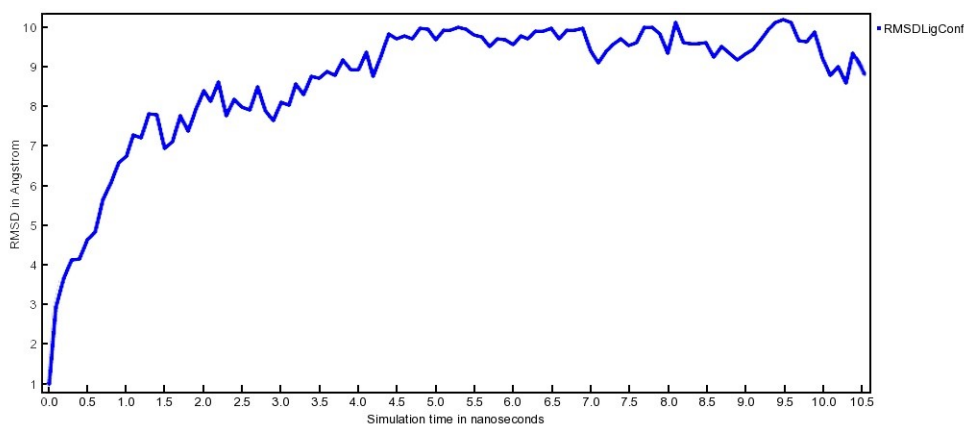

**Figure S37:** Variation of RMSD values calculated for the conformation **4a** during the MD simulation with respect to its starting conformation to summarize conformational changes.

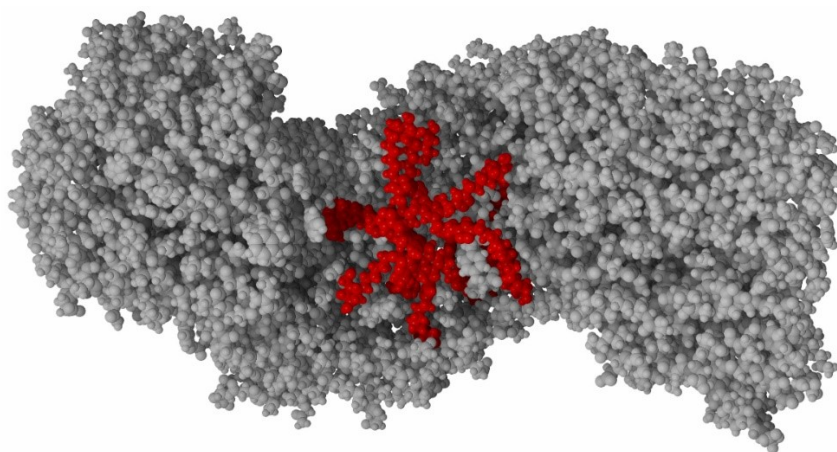

**Figure S38:** Lowest energy structure of the complex **5a@(LH)<sub>2</sub>**

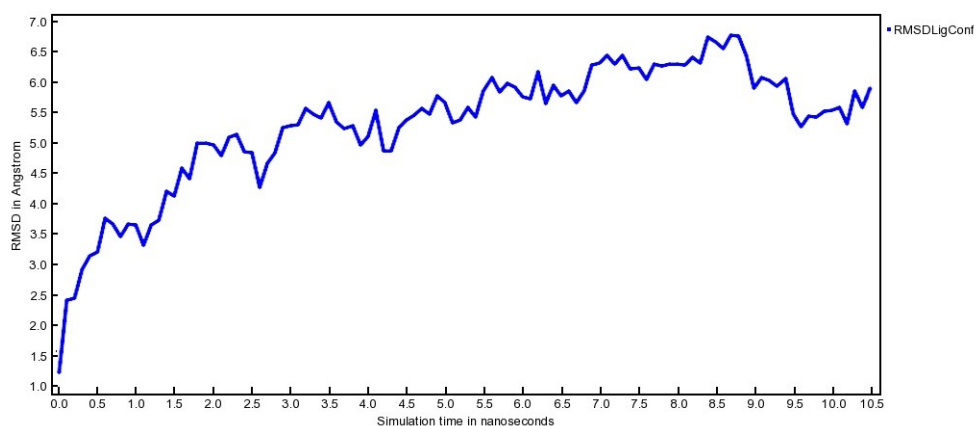

**Figure S39:** Variation of RMSD values calculated for the conformation **5a** during the MD simulation with respect to its starting conformation to summarize conformational changes.

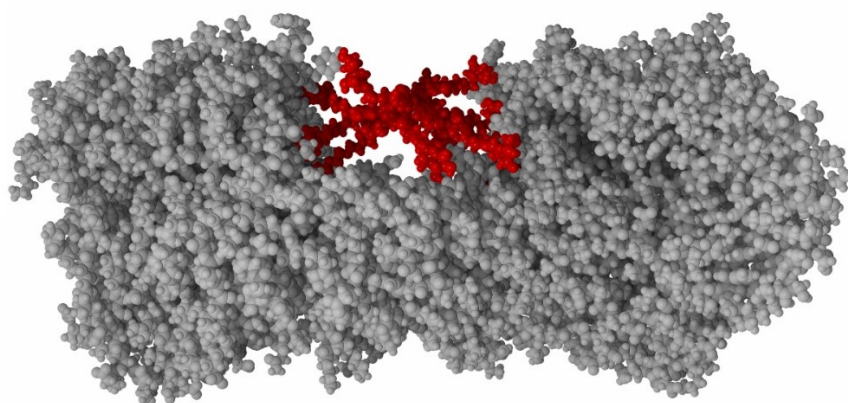

**Figure S40:** Lowest energy structure of the complex **5b**@(LH)<sub>2</sub>

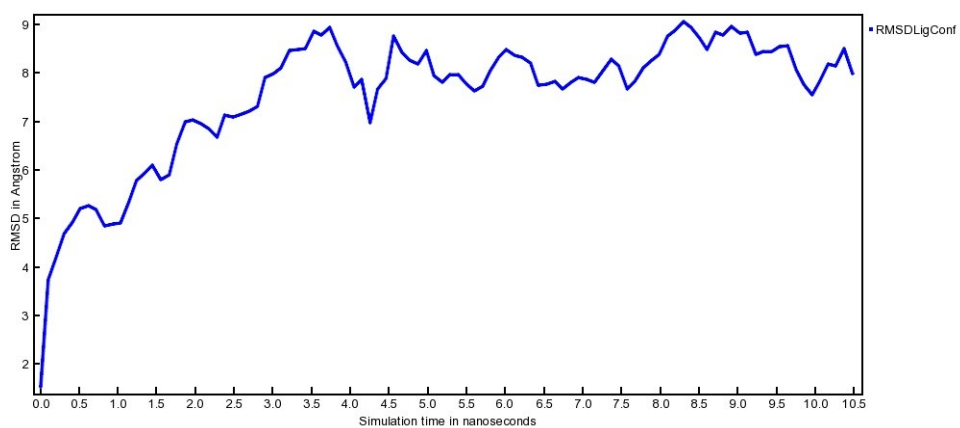

**Figure S41:** Variation of RMSD values calculated for the conformation **5b** during the MD simulation with respect to its starting conformation to summarize conformational changes.

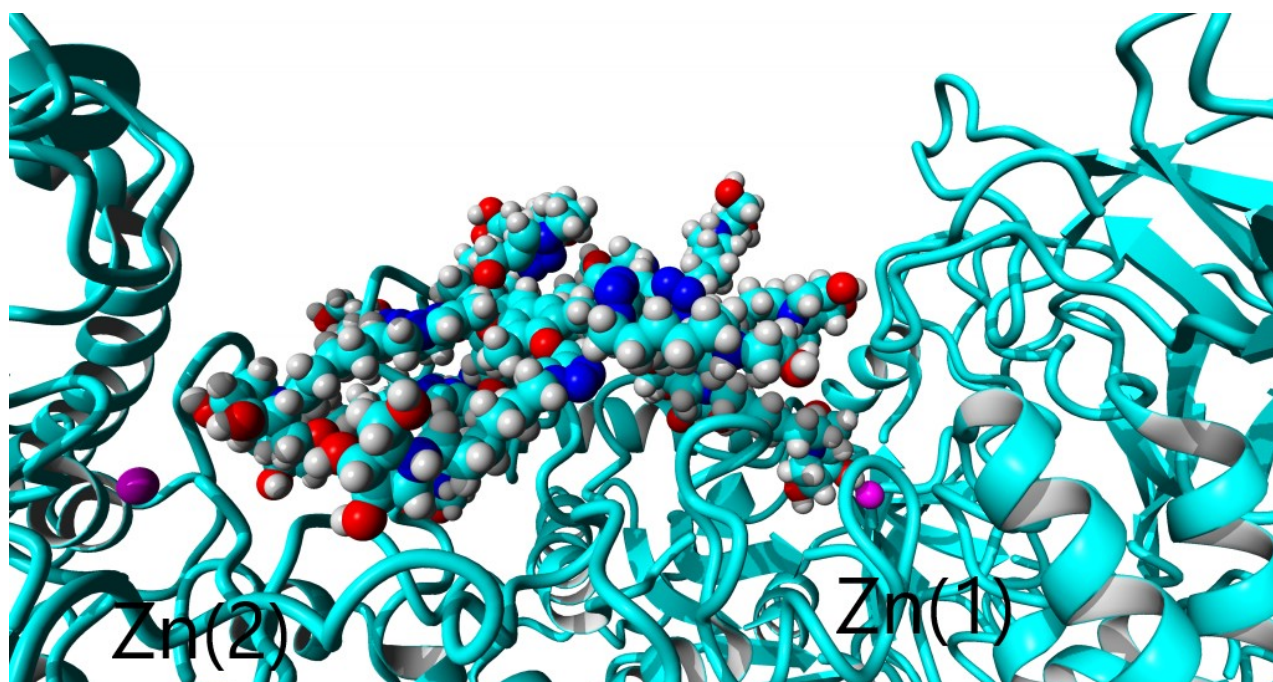

**Figure S42:** Detailed view of the lowest energy structure of the complex  $5a@(LH)_2$  obtained by MD simulation, in which the resorcinarene cluster  $5a$  is mono-coordinated to Zn(1) atom, see also figure 5 in the main text.

Stabilizing secondary interactions between the DAB-1 and the side chains of amino acids were detected during the MD (SI). In details, the side chain of Asp267 acts as bidentate acceptor of two H-bonds with 4-OH and 6-CH<sub>2</sub>OH groups of a free (non-chelating) DAB-1 unit (Figure S43). Interestingly, other stabilizing H-bonding interactions were detected during the MD between free DAB-1 units and the side chains of Asp268 (Figure S43), Gln228 (Figures S44-45), Asp229 (Figures S44-45) and Glu49 (Figure S45). In addition, a relevant O-H $\cdots$  $\pi$  interaction was detected between the 4-OH of a DAB-1 unit and the aromatic side chain of Trp28 during the MD simulation (Figure S46).

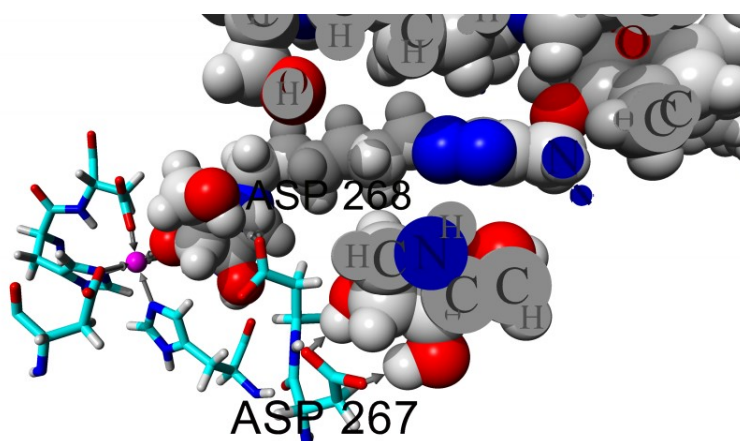

**Figure S43:** The side chain of Asp267 acts as bidentate acceptor of two H-bonds with 4-OH and 6-CH<sub>2</sub>OH groups of a free (non-chelating) DAB-1 unit.

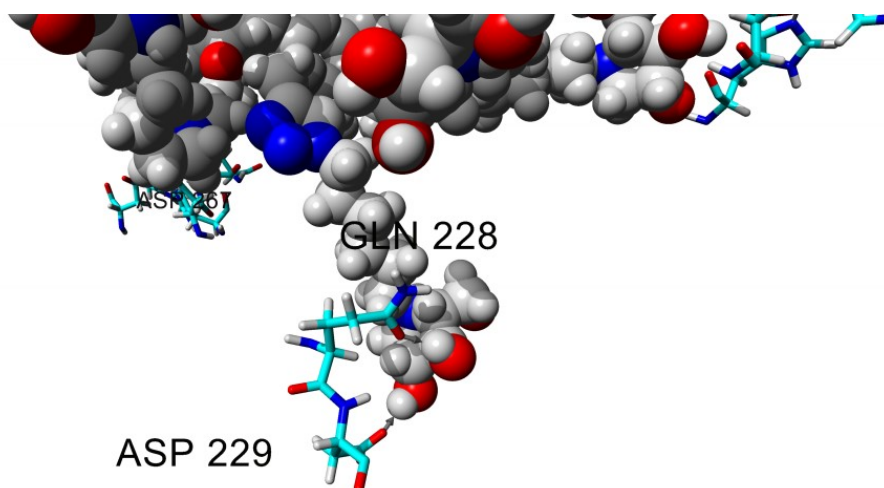

**Figure S44:** The side chain of Asp229 and Gln 228 establish H-bonds with OH groups of a free (non-chelating) DAB-1 unit.

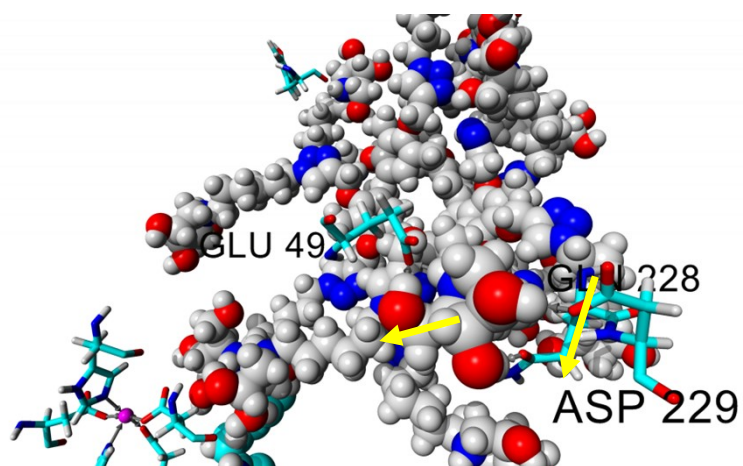

**Figure S45:** The side chain of Glu 49 establishes an H-bond with an OH group of a free (non-chelating) DAB-1 unit.

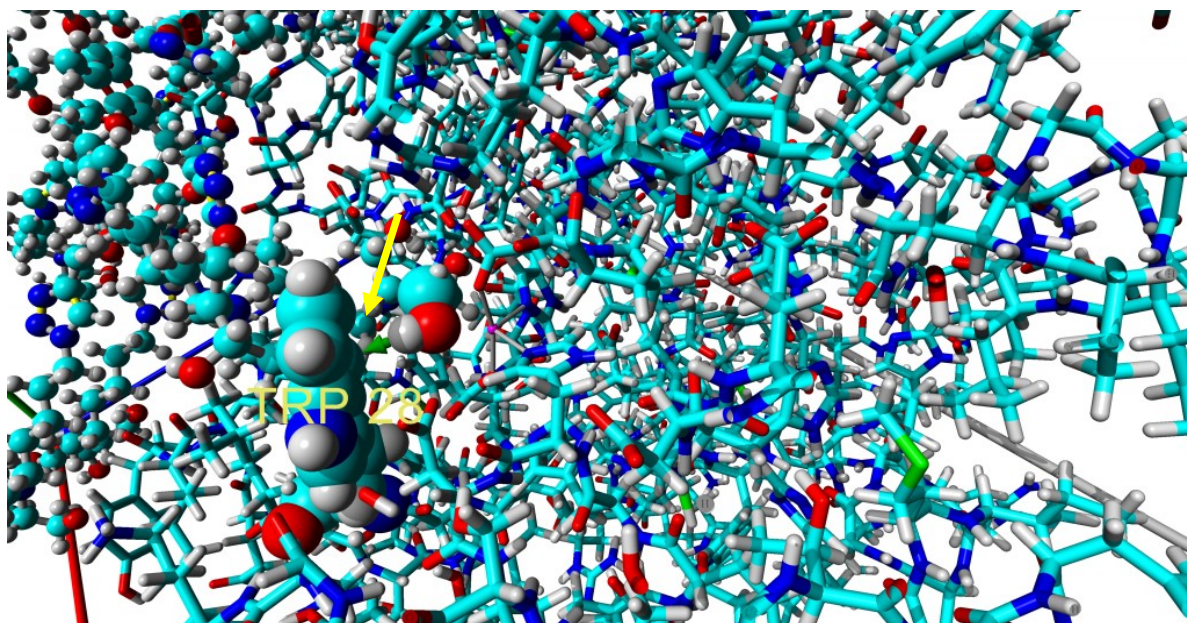

**Figure S46:** The side chain of Trp 28 establishes an OH $\cdots\pi$  interaction with an OH group of a free (non-chelating) DAB-1 unit.

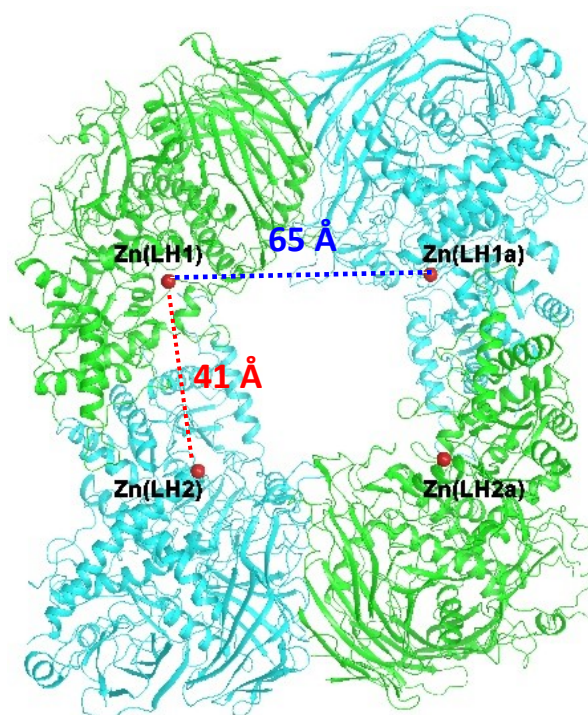

**Figure S47:** Representation of the tetrameric protein 2x(LH)2 formed by four LH dimers. Intradimeric Zn $\cdots$ Zn mean distance = 41 Å (measured between LH1/LH2 and LH1a/LH2a); interdimeric Zn $\cdots$ Zn mean distance = 65 Å (measured between LH1/LH1a and LH2/LH2a).

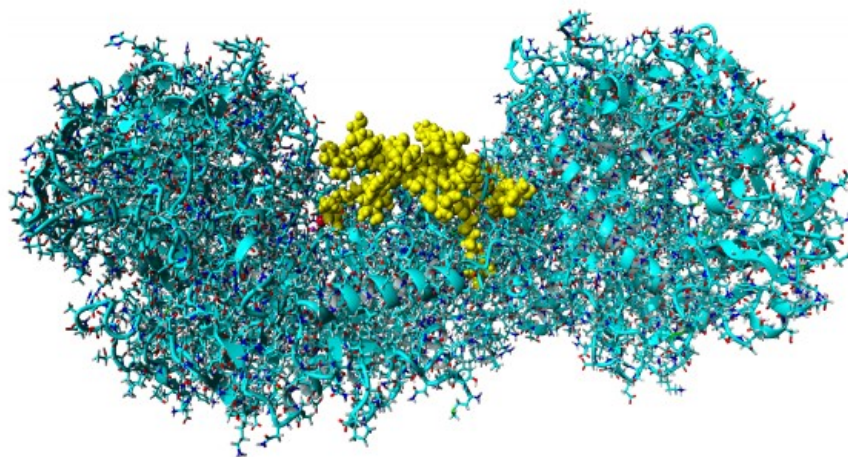

**Figure S48:** Lowest energy structure of the complex **5a**@(LH)<sub>2</sub> obtained by MD simulation.

## Docking Studies with VINA

At this point a docking study (Figure S48) was performed starting by the tetrameric 2×(LH)<sub>2</sub> protein with the aim to confirm the results of MD simulations. Following a protocol previously reported by some of us, the resorcinarene-based multivalent architectures **3a-5a** and **5b** were optimized by molecular mechanics calculations and molecular dynamics simulations in a box of water molecules using the YASARA program and AMBER force field.

Regarding the resorcin[6]arene-based compound **5a**, docking studies performed with VINA<sup>17</sup> (Figure S48) showed that the 12-valent cluster binds only one active site of the tetrameric enzyme with one DAB-1 unit inside the active site pocket (SI) to establish interactions with the catalytically active zinc ion. Analogously, VINA calculations indicated a mono-coordination for the multivalent compounds **3a**, **4a** and **5b**.

## NBO and NCI Calculations

The energy contribution of noncovalent interactions (NCI) was evaluated by a second order perturbation theory (SOPT) analysis of the Fock matrix in the natural bond orbital (NBO) basis. SOPT analyses were performed on simplified models of the complex **5a**@JBMan and **5b**@JBMan as obtained by AutoDock4<sub>Zn</sub> calculations (Figure S49). and considering the 16 most significant amino acid residues<sup>18</sup> surrounding the chain armed with DAB-1 unit coordinated to the Zn atom. DFT NBO and NCI analysis was performed at the B3LYP/6-31G level of theory with Gaussian 16.

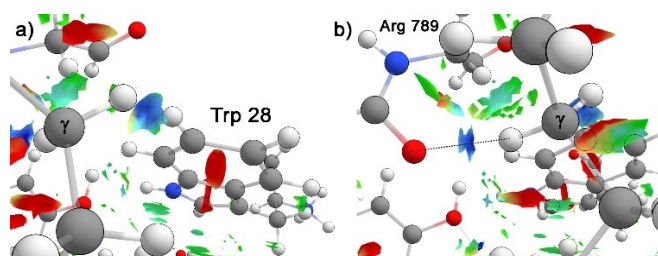

**Figure S49:** Non-covalent interaction plots by the sign of the second Hessian eigenvalue (gradient isosurfaces ( $s = 0.6$  a.u.) for: (a) interaction between the CH<sub>2</sub> in  $\gamma$  position of **5a**, and the aromatic ring of the

<sup>17</sup> O. Trott and A. J. Olson, AutoDock Vina: Improving the Speed and Accuracy of Docking with a New Scoring Function, Efficient Optimization, and Multithreading. *J. Comput. Chem.* 2009, **31**, 455-461

<sup>18</sup> The residues involved in DFT analysis were: His 23, Asp 24, Asp 25, Trp 28, Asp 145, Phe 147, Arg 170, Tyr 210, Asp 268, Trp 333, His 385, His 386, Asp 387, Tyr 625, Arg 789 and Gly 790

TRP28. (b) Moderate C–H...O=C<sup>Arg789</sup> H-bonding interaction. The  $\gamma$ C–H...O=C<sup>Arg789</sup> H-bond computed by DFT NBO calculations shows a C...O distance of 3.00 Å and a C–H...O angle of 131°. NBO calculations evidenced a LP→ $\sigma^*$  donation of the lone pair on the oxygen atom of the carbonyl of Arg789 to the antibonding orbital of the  $\gamma$ C–H bond. In addition, the  $\gamma$ -CH<sub>2</sub> was involved in a C–H... $\pi$ <sup>Trp28</sup> interaction with the aromatic side chain of Trp28, and finally, hydrophobic contacts between the alkyl chain of 5a and GLY788 and GLY790 were detected. All these interactions accounted for 93% of the total NBO-stabilization energy between alkyl chain and active site pocket. In the coloring isosurface blue and green colors represent strong and medium interactions (H-bonding and van der Waals).

## DFT structures of simplified models of the complex 5a@JB $\alpha$ -man

|   |              |             |              |   |              |             |              |
|---|--------------|-------------|--------------|---|--------------|-------------|--------------|
| N | -28.51800000 | 3.06600000  | -19.94900000 | H | -20.90300000 | 10.87900000 | -22.50800000 |
| H | -29.27000000 | 2.46900000  | -20.23000000 | H | -20.44700000 | 10.63400000 | -20.95800000 |
| H | -27.78000000 | 2.51300000  | -19.56300000 | C | -21.07500000 | 12.56200000 | -21.33000000 |
| H | -28.92200000 | 3.38400000  | -19.06800000 | C | -21.04200000 | 13.75600000 | -22.01400000 |
| C | -28.09900000 | 4.03700000  | -20.94800000 | H | -20.56900000 | 13.90500000 | -22.88200000 |
| H | -28.34200000 | 3.66700000  | -21.84400000 | C | -21.82600000 | 12.81600000 | -20.13000000 |
| C | -26.59600000 | 4.21500000  | -20.81500000 | N | -21.75600000 | 14.71900000 | -21.32900000 |
| O | -26.11400000 | 4.75200000  | -19.81500000 | H | -21.89700000 | 15.68200000 | -21.63400000 |
| C | -28.83100000 | 5.36600000  | -20.78300000 | C | -22.24400000 | 14.16800000 | -20.17200000 |
| H | -29.81500000 | 5.21100000  | -20.87300000 | C | -22.21700000 | 12.02500000 | -19.04200000 |
| H | -28.63400000 | 5.73700000  | -19.87600000 | H | -21.96000000 | 11.06000000 | -18.99500000 |
| C | -28.42100000 | 6.38100000  | -21.80400000 | C | -22.99900000 | 14.74900000 | -19.14900000 |
| N | -28.49100000 | 6.13100000  | -23.16000000 | H | -23.26900000 | 15.71100000 | -19.18800000 |
| H | -28.83500000 | 5.27000000  | -23.58400000 | C | -22.97000000 | 12.60900000 | -18.02900000 |
| C | -27.89200000 | 7.62300000  | -21.67500000 | H | -23.24200000 | 12.05800000 | -17.24000000 |
| H | -27.70700000 | 8.10400000  | -20.81800000 | C | -23.35500000 | 13.95600000 | -18.09400000 |
| C | -28.04100000 | 7.18400000  | -23.82200000 | H | -23.90200000 | 14.34500000 | -17.35200000 |
| H | -27.99800000 | 7.27400000  | -24.81700000 | N | -31.75800000 | 9.39700000  | -25.78700000 |
| N | -27.65700000 | 8.09700000  | -22.94700000 | H | -31.99900000 | 8.70900000  | -25.10200000 |
| N | -25.84800000 | 3.75300000  | -21.80400000 | H | -32.55500000 | 9.59200000  | -26.35900000 |
| H | -26.30000000 | 3.42600000  | -22.65800000 | H | -31.28000000 | 8.77300000  | -26.43700000 |
| C | -24.39000000 | 3.69900000  | -21.70300000 | C | -31.06400000 | 10.57800000 | -25.26500000 |
| H | -24.12700000 | 4.02300000  | -20.79400000 | H | -31.74300000 | 10.93300000 | -24.62300000 |
| C | -23.77400000 | 4.62200000  | -22.75000000 | C | -30.78900000 | 11.72500000 | -26.25500000 |
| O | -23.71200000 | 4.28400000  | -23.93900000 | H | -30.64800000 | 11.54400000 | -27.22800000 |
| C | -23.92400000 | 2.26000000  | -21.85200000 | O | -30.74800000 | 12.88000000 | -25.80700000 |
| H | -24.18200000 | 1.92900000  | -22.76000000 | C | -29.74100000 | 10.14000000 | -24.60800000 |
| H | -22.92900000 | 2.23100000  | -21.75700000 | H | -29.89100000 | 9.28200000  | -24.11600000 |
| C | -24.54200000 | 1.35100000  | -20.80600000 | H | -29.05500000 | 10.00000000 | -25.32200000 |
| O | -24.91600000 | 1.85900000  | -19.71200000 | C | -29.20700000 | 11.17100000 | -23.62400000 |
| O | -24.66100000 | 0.13300000  | -21.08600000 | O | -30.00400000 | 11.95900000 | -23.08600000 |
| N | -23.32600000 | 5.79400000  | -22.31200000 | O | -27.98500000 | 11.20200000 | -23.39900000 |
| H | -23.41000000 | 6.03500000  | -21.32500000 | N | -30.46400000 | 15.01400000 | -28.58700000 |
| C | -22.71300000 | 6.73700000  | -23.24500000 | H | -30.27000000 | 14.39700000 | -27.82400000 |
| H | -23.35500000 | 6.83200000  | -24.00600000 | H | -30.96600000 | 14.52000000 | -29.29700000 |
| C | -21.38500000 | 6.19100000  | -23.75700000 | H | -29.54200000 | 14.99700000 | -29.02400000 |
| H | -21.21200000 | 6.16200000  | -24.74200000 | C | -31.03100000 | 16.31000000 | -28.21100000 |
| O | -20.51800000 | 5.78300000  | -22.97600000 | H | -31.67100000 | 16.15400000 | -27.45800000 |
| C | -22.49700000 | 8.08900000  | -22.56300000 | C | -31.78300000 | 16.88700000 | -29.40800000 |
| H | -22.03200000 | 7.93800000  | -21.69100000 | H | -32.69000000 | 16.52800000 | -29.62600000 |
| H | -21.92300000 | 8.65800000  | -23.15200000 | O | -31.31100000 | 17.78100000 | -30.11600000 |
| C | -23.80800000 | 8.82700000  | -22.29700000 | C | -29.92600000 | 17.25300000 | -27.72100000 |
| O | -24.68800000 | 8.82900000  | -23.19500000 | H | -29.52900000 | 17.71000000 | -28.51700000 |
| O | -23.95100000 | 9.42500000  | -21.19800000 | H | -30.34100000 | 17.93400000 | -27.11800000 |
| N | -18.24000000 | 10.23600000 | -22.49300000 | C | -28.79500000 | 16.54800000 | -26.95200000 |
| H | -18.79800000 | 9.41000000  | -22.41500000 | C | -29.07100000 | 15.62000000 | -25.96200000 |
| H | -17.77900000 | 10.24500000 | -23.38000000 | H | -30.02100000 | 15.40900000 | -25.73300000 |
| H | -17.45000000 | 9.92500000  | -21.92800000 | C | -27.46400000 | 16.81900000 | -27.24100000 |
| C | -18.91900000 | 11.47700000 | -22.13600000 | H | -27.24500000 | 17.49000000 | -27.95000000 |
| H | -18.91000000 | 12.03600000 | -22.96500000 | C | -28.03300000 | 14.97400000 | -25.27800000 |
| C | -18.12800000 | 12.14700000 | -21.02000000 | H | -28.24800000 | 14.30300000 | -24.56800000 |
| H | -18.30800000 | 11.91400000 | -20.06400000 | C | -26.41900000 | 16.17400000 | -26.56200000 |
| O | -17.26100000 | 12.98300000 | -21.30600000 | H | -25.46800000 | 16.38000000 | -26.79300000 |
| C | -20.40200000 | 11.26500000 | -21.73300000 | C | -26.70700000 | 15.25900000 | -25.57900000 |



|   |              |             |              |   |              |             |              |
|---|--------------|-------------|--------------|---|--------------|-------------|--------------|
| H | -25.96800000 | 14.80200000 | -25.08400000 | C | -29.97400000 | 23.07800000 | -27.33200000 |
| N | -36.52500000 | 13.02700000 | -25.40100000 | H | -29.25300000 | 23.43400000 | -26.73800000 |
| H | -36.26000000 | 12.65000000 | -24.51300000 | C | -29.58600000 | 23.18400000 | -28.80500000 |
| H | -37.41900000 | 12.66400000 | -25.66500000 | H | -29.21900000 | 24.05100000 | -29.14300000 |
| H | -35.95000000 | 12.42200000 | -25.98700000 | O | -29.70700000 | 22.24400000 | -29.59500000 |
| C | -36.38700000 | 14.47100000 | -25.52200000 | C | -30.22000000 | 21.62800000 | -26.93400000 |
| H | -36.72300000 | 14.84500000 | -24.65800000 | H | -31.00600000 | 21.28900000 | -27.45100000 |
| C | -37.22100000 | 14.97500000 | -26.68700000 | H | -29.40900000 | 21.09500000 | -27.17300000 |
| H | -37.93100000 | 15.66200000 | -26.53200000 | C | -30.50100000 | 21.38000000 | -25.49400000 |
| O | -37.02400000 | 14.53700000 | -27.83100000 | C | -31.28400000 | 22.12400000 | -24.66900000 |
| C | -34.92800000 | 14.86900000 | -25.73100000 | H | -31.76900000 | 22.95600000 | -24.93700000 |
| H | -34.57600000 | 14.39100000 | -26.53600000 | C | -30.02200000 | 20.28600000 | -24.71500000 |
| H | -34.88200000 | 15.85600000 | -25.88300000 | N | -31.31200000 | 21.57000000 | -23.41800000 |
| C | -34.03100000 | 14.54800000 | -24.59000000 | H | -31.81900000 | 21.94100000 | -22.61400000 |
| H | -34.39000000 | 14.97900000 | -23.76200000 | C | -30.54700000 | 20.43400000 | -23.42400000 |
| H | -34.00600000 | 13.55600000 | -24.46500000 | C | -29.20100000 | 19.19500000 | -24.98700000 |
| C | -32.63400000 | 15.06600000 | -24.87400000 | H | -28.81600000 | 19.06300000 | -25.90000000 |
| H | -32.33900000 | 14.78000000 | -25.78600000 | C | -30.28400000 | 19.53200000 | -22.40800000 |
| H | -32.61800000 | 16.06400000 | -24.81600000 | H | -30.67300000 | 19.64800000 | -21.49400000 |
| N | -31.69800000 | 14.52900000 | -23.89300000 | C | -28.93100000 | 18.30600000 | -23.98000000 |
| H | -31.16100000 | 13.70100000 | -24.15000000 | H | -28.33700000 | 17.52200000 | -24.16200000 |
| C | -31.49900000 | 15.05000000 | -22.68400000 | C | -29.47100000 | 18.47700000 | -22.70600000 |
| N | -32.19700000 | 16.12300000 | -22.28100000 | H | -29.25700000 | 17.81000000 | -21.99300000 |
| H | -32.87700000 | 16.55300000 | -22.90700000 | N | -21.22800000 | 9.14400000  | -31.56300000 |
| H | -32.04500000 | 16.52200000 | -21.35500000 | H | -21.48200000 | 8.46700000  | -32.25300000 |
| N | -30.60900000 | 14.48700000 | -21.86500000 | H | -21.16200000 | 10.04600000 | -31.98900000 |
| H | -30.07800000 | 13.67100000 | -22.17100000 | H | -20.23000000 | 8.93700000  | -31.53200000 |
| H | -30.45700000 | 14.88600000 | -20.93900000 | C | -22.01300000 | 9.09600000  | -30.32700000 |
| N | -36.00300000 | 9.09500000  | -19.57400000 | H | -22.77400000 | 8.47200000  | -30.50500000 |
| H | -36.50700000 | 9.62500000  | -20.25600000 | C | -22.57000000 | 10.47900000 | -29.99000000 |
| H | -36.36100000 | 9.29800000  | -18.66300000 | O | -22.01500000 | 11.50900000 | -30.39400000 |
| H | -35.18300000 | 9.69900000  | -19.52500000 | C | -21.16300000 | 8.55000000  | -29.17600000 |
| C | -35.86800000 | 7.67900000  | -19.87700000 | H | -21.12600000 | 7.55300000  | -29.24200000 |
| H | -36.77000000 | 7.43100000  | -20.23100000 | H | -20.23800000 | 8.92400000  | -29.24700000 |
| C | -35.58100000 | 6.82800000  | -18.64800000 | C | -21.69800000 | 8.90100000  | -27.82800000 |
| H | -35.75000000 | 7.19200000  | -17.73200000 | N | -22.88900000 | 8.39300000  | -27.34900000 |
| O | -35.13700000 | 5.68200000  | -18.79200000 | H | -23.48400000 | 7.72300000  | -27.83500000 |
| C | -34.79700000 | 7.45000000  | -20.92900000 | C | -21.23800000 | 9.75200000  | -26.87900000 |
| H | -34.64900000 | 6.46400000  | -21.01100000 | H | -20.39400000 | 10.28700000 | -26.91900000 |
| H | -35.13500000 | 7.81000000  | -21.79800000 | C | -23.13400000 | 8.91400000  | -26.16000000 |
| C | -33.46000000 | 8.09400000  | -20.65400000 | H | -23.93000000 | 8.71600000  | -25.58800000 |
| C | -32.55900000 | 7.53300000  | -19.75200000 | N | -22.14900000 | 9.74100000  | -25.85300000 |
| H | -32.80600000 | 6.69300000  | -19.26800000 | H | -22.07800000 | 10.28300000 | -24.99200000 |
| C | -33.08100000 | 9.24500000  | -21.33800000 | N | -23.71400000 | 10.50300000 | -29.28400000 |
| H | -33.71100000 | 9.65500000  | -21.99800000 | H | -24.06500000 | 9.64200000  | -28.86400000 |
| C | -31.32600000 | 8.12000000  | -19.51400000 | C | -24.46400000 | 11.75300000 | -29.11100000 |
| H | -30.70000000 | 7.71800000  | -18.84600000 | H | -24.45100000 | 12.13600000 | -30.03500000 |
| C | -31.83300000 | 9.83900000  | -21.11800000 | C | -23.78400000 | 12.76300000 | -28.18200000 |
| H | -31.57400000 | 10.66700000 | -21.61500000 | O | -24.30000000 | 13.68700000 | -28.04400000 |
| C | -30.96100000 | 9.26900000  | -20.20600000 | C | -25.91100000 | 11.48300000 | -28.63600000 |
| O | -29.73500000 | 9.84900000  | -19.99000000 | H | -26.35000000 | 12.35800000 | -28.43200000 |
| H | -29.13700000 | 9.45800000  | -19.36400000 | H | -26.40900000 | 11.02300000 | -29.37100000 |
| N | -28.74100000 | 6.15000000  | -16.67100000 | C | -26.02800000 | 10.62400000 | -27.40800000 |
| H | -29.39900000 | 5.94000000  | -17.39400000 | N | -26.13000000 | 9.24500000  | -27.46700000 |
| H | -28.91400000 | 5.56300000  | -15.88000000 | H | -26.11200000 | 8.69000000  | -28.32200000 |
| H | -29.19000000 | 6.99400000  | -16.31700000 | C | -26.13100000 | 10.95000000 | -26.09600000 |
| C | -27.33800000 | 6.22100000  | -17.10300000 | H | -26.12200000 | 11.87300000 | -25.71100000 |
| H | -27.35000000 | 5.98200000  | -18.07400000 | C | -26.25500000 | 8.75800000  | -26.24300000 |
| C | -26.47200000 | 5.22800000  | -16.34100000 | H | -26.33800000 | 7.79100000  | -26.00400000 |
| H | -25.96400000 | 4.52800000  | -16.84300000 | N | -26.25100000 | 9.76900000  | -25.39000000 |
| O | -26.38900000 | 5.27600000  | -15.10500000 | N | -22.64000000 | 12.41800000 | -27.57400000 |
| C | -26.78300000 | 7.63000000  | -16.89600000 | H | -22.36900000 | 11.43500000 | -27.57200000 |
| H | -26.78800000 | 7.83800000  | -15.91800000 | C | -21.76100000 | 13.38300000 | -26.91400000 |
| H | -25.84400000 | 7.66000000  | -17.23900000 | H | -22.30100000 | 14.22400000 | -26.94400000 |
| C | -27.58300000 | 8.69400000  | -17.61000000 | C | -20.43700000 | 13.60300000 | -27.64000000 |
| O | -28.32100000 | 8.35900000  | -18.55700000 | H | -20.24900000 | 13.13400000 | -28.50300000 |
| O | -27.48300000 | 9.88200000  | -17.21300000 | O | -19.59100000 | 14.37500000 | -27.14500000 |
| N | -31.15700000 | 23.90800000 | -27.11400000 | C | -21.44300000 | 12.94000000 | -25.48600000 |
| H | -31.23700000 | 24.30100000 | -26.19800000 | H | -20.98500000 | 12.05100000 | -25.51700000 |
| H | -31.30600000 | 24.62300000 | -27.79800000 | H | -20.83600000 | 13.61400000 | -25.06500000 |
| H | -32.08000000 | 23.47600000 | -27.16100000 | C | -22.67200000 | 12.80900000 | -24.62500000 |

|    |              |             |              |   |                           |             |              |
|----|--------------|-------------|--------------|---|---------------------------|-------------|--------------|
| O  | -23.40200000 | 13.81300000 | -24.47400000 | H | -26.05400000              | 15.71600000 | -17.45600000 |
| O  | -22.89700000 | 11.69500000 | -24.10800000 | H | -25.48500000              | 14.56900000 | -16.44100000 |
| N  | -23.87300000 | 22.63400000 | -24.81500000 | C | -27.18000000              | 13.94900000 | -17.50700000 |
| H  | -23.12800000 | 21.97400000 | -24.91400000 | H | -26.64000000              | 13.11500000 | -17.62300000 |
| H  | -23.55700000 | 23.53900000 | -25.09900000 | H | -27.98000000              | 13.75200000 | -16.94100000 |
| H  | -23.77900000 | 22.77800000 | -23.81000000 | C | -27.66000000              | 14.42600000 | -18.89500000 |
| C  | -25.15500000 | 22.21500000 | -25.39100000 | H | -28.65300000              | 14.54600000 | -18.87900000 |
| H  | -24.88600000 | 21.63300000 | -26.15800000 | H | -27.22200000              | 15.29700000 | -19.11600000 |
| C  | -25.97900000 | 23.40800000 | -25.88100000 | N | -27.34200000              | 13.47500000 | -19.98900000 |
| H  | -26.13500000 | 24.18100000 | -25.26600000 | H | -28.07600000              | 13.73900000 | -20.61500000 |
| O  | -26.45600000 | 23.43700000 | -27.02300000 | C | -26.05200000              | 13.63500000 | -20.72200000 |
| C  | -26.00600000 | 21.45200000 | -24.35800000 | H | -25.31300000              | 13.83700000 | -20.07900000 |
| H  | -26.26400000 | 22.10200000 | -23.64300000 | C | -25.89900000              | 12.28400000 | -21.44100000 |
| H  | -26.82800000 | 21.12700000 | -24.82700000 | H | -26.42100000              | 12.18600000 | -22.28800000 |
| C  | -25.37500000 | 20.24300000 | -23.66300000 | C | -26.25200000              | 11.30800000 | -20.30700000 |
| C  | -24.57700000 | 20.40400000 | -22.53300000 | H | -25.48700000              | 11.04100000 | -19.72100000 |
| H  | -24.39800000 | 21.32500000 | -22.18600000 | C | -27.40500000              | 12.03700000 | -19.57500000 |
| C  | -25.64500000 | 18.93700000 | -24.09800000 | H | -28.29000000              | 11.65300000 | -19.83800000 |
| H  | -26.23200000 | 18.79800000 | -24.89600000 | H | -27.29300000              | 11.97000000 | -18.58400000 |
| C  | -24.02000000 | 19.29800000 | -21.87200000 | C | -25.99900000              | 14.85000000 | -21.67900000 |
| H  | -23.42800000 | 19.43500000 | -21.07800000 | H | -26.85300000              | 14.94100000 | -22.19200000 |
| C  | -25.10800000 | 17.82000000 | -23.43600000 | H | -25.82000000              | 15.69600000 | -21.17600000 |
| H  | -25.30900000 | 16.89600000 | -23.76100000 | O | -24.94500000              | 14.67500000 | -22.62100000 |
| C  | -24.29300000 | 18.01000000 | -22.32300000 | H | -24.42280000              | 15.49870000 | -22.47910000 |
| O  | -23.75900000 | 16.91700000 | -21.66000000 | O | -24.59500000              | 12.05800000 | -22.00000000 |
| H  | -23.20300000 | 17.04700000 | -20.90100000 | H | -24.47300000              | 12.76600000 | -22.67400000 |
| N  | -25.89800000 | 21.08800000 | -17.65200000 | O | -26.59900000              | 10.00400000 | -20.78300000 |
| H  | -26.40700000 | 21.92200000 | -17.86600000 | H | -25.92500000              | 9.79600000  | -21.45900000 |
| H  | -25.60700000 | 21.11100000 | -16.69600000 | H | -26.99960000              | 16.56000000 | -12.54980000 |
| H  | -25.00900000 | 21.35400000 | -18.07500000 |   |                           |             |              |
| C  | -26.54100000 | 19.85300000 | -18.06900000 |   | 1 5 1.0 2 1.0 3 1.0 4 1.0 |             |              |
| H  | -27.35100000 | 19.79000000 | -17.48600000 |   | 2                         |             |              |
| C  | -25.64600000 | 18.64400000 | -17.82000000 |   | 3                         |             |              |
| O  | -25.89300000 | 17.58200000 | -18.38300000 |   | 4                         |             |              |
| C  | -26.95500000 | 19.91400000 | -19.54300000 |   | 5 6 1.0 7 1.0 9 1.0       |             |              |
| H  | -26.14400000 | 20.14100000 | -20.08300000 |   | 6                         |             |              |
| H  | -27.28900000 | 19.00900000 | -19.80800000 |   | 7 8 2.0 20 1.0            |             |              |
| C  | -28.05500000 | 20.95000000 | -19.85900000 |   | 8                         |             |              |
| H  | -27.72300000 | 21.86100000 | -19.61400000 |   | 9 12 1.0 10 1.0 11 1.0    |             |              |
| H  | -28.25800000 | 20.92100000 | -20.83800000 |   | 10                        |             |              |
| C  | -29.34800000 | 20.66700000 | -19.07700000 |   | 11                        |             |              |
| H  | -29.67700000 | 19.75000000 | -19.30100000 |   | 12 13 1.0 15 2.0          |             |              |
| H  | -29.16100000 | 20.72400000 | -18.09600000 |   | 13 14 1.0 17 1.0          |             |              |
| N  | -30.43800000 | 21.61200000 | -19.37500000 |   | 14                        |             |              |
| H  | -31.18300000 | 21.29300000 | -19.99400000 |   | 15 16 1.0 19 1.0          |             |              |
| C  | -30.52200000 | 22.85100000 | -18.89600000 |   | 16                        |             |              |
| N  | -29.57100000 | 23.33900000 | -18.08300000 |   | 17 18 1.0 19 2.0          |             |              |
| H  | -28.77400000 | 22.75800000 | -17.82200000 |   | 18                        |             |              |
| H  | -29.63500000 | 24.28800000 | -17.71600000 |   | 19                        |             |              |
| N  | -31.56100000 | 23.60800000 | -19.23600000 |   | 20 21 1.0 22 1.0          |             |              |
| H  | -32.28300000 | 23.23700000 | -19.85300000 |   | 21                        |             |              |
| H  | -31.62500000 | 24.55700000 | -18.86900000 |   | 22 23 1.0 24 1.0 26 1.0   |             |              |
| N  | -24.59700000 | 18.77500000 | -17.01100000 |   | 23                        |             |              |
| H  | -24.32100000 | 19.70700000 | -16.70100000 |   | 24 25 2.0 32 1.0          |             |              |
| C  | -23.83400000 | 17.62300000 | -16.55800000 |   | 25                        |             |              |
| H  | -23.83700000 | 17.65500000 | -15.55900000 |   | 26 29 1.0 27 1.0 28 1.0   |             |              |
| H  | -24.33100000 | 16.81300000 | -16.86800000 |   | 27                        |             |              |
| C  | -22.39000000 | 17.53000000 | -17.04300000 |   | 28                        |             |              |
| H  | -22.09000000 | 18.03400000 | -17.85300000 |   | 29 30 2.0 31 1.0          |             |              |
| O  | -21.59900000 | 16.82000000 | -16.41400000 |   | 30                        |             |              |
| Zn | -26.49900000 | 9.83300000  | -23.33400000 |   | 31                        |             |              |
| C  | -26.31090000 | 16.72400000 | -13.37860000 |   | 32 33 1.0 34 1.0          |             |              |
| H  | -25.30300000 | 16.91210000 | -12.98030000 |   | 33                        |             |              |
| H  | -26.64410000 | 17.59690000 | -13.95910000 |   | 34 35 1.0 36 1.0 39 1.0   |             |              |
| C  | -26.29300000 | 15.47400000 | -14.27800000 |   | 35                        |             |              |
| H  | -25.34200000 | 15.23700000 | -14.47900000 |   | 36 38 2.0 37 1.0          |             |              |
| H  | -26.72800000 | 14.71900000 | -13.78700000 |   | 37                        |             |              |
| C  | -27.04200000 | 15.69300000 | -15.61300000 |   | 38                        |             |              |
| H  | -27.96200000 | 15.30800000 | -15.53700000 |   | 39 42 1.0 40 1.0 41 1.0   |             |              |
| H  | -27.10500000 | 16.67500000 | -15.79300000 |   | 40                        |             |              |
| C  | -26.31000000 | 15.01300000 | -16.79200000 |   | 41                        |             |              |

|                                     |                                     |
|-------------------------------------|-------------------------------------|
| 42 43 2.0 44 1.0                    | 113                                 |
| 43                                  | 114 115 1.0 116 1.0 119 1.0         |
| 44                                  | 115                                 |
| 45 49 1.0 46 1.0 47 1.0 48 1.0      | 116 118 2.0 117 1.0                 |
| 46                                  | 117                                 |
| 47                                  | 118                                 |
| 48                                  | 119 122 1.0 120 1.0 121 1.0         |
| 49 50 1.0 51 1.0 54 1.0             | 120                                 |
| 50                                  | 121                                 |
| 51 53 2.0 52 1.0                    | 122 125 1.0 123 1.0 124 1.0         |
| 52                                  | 123                                 |
| 53                                  | 124                                 |
| 54 57 1.0 55 1.0 56 1.0             | 125 128 1.0 126 1.0 127 1.0         |
| 55                                  | 126                                 |
| 56                                  | 127                                 |
| 57 58 1.5 60 1.5                    | 128 129 1.0 130 1.5                 |
| 58 59 1.0 61 1.0                    | 129                                 |
| 59                                  | 130 131 1.5 134 1.5                 |
| 60 63 1.5 64 1.5                    | 131 132 1.0 133 1.0                 |
| 61 62 1.0 63 1.0                    | 132                                 |
| 62                                  | 133                                 |
| 63 66 1.5                           | 134 135 1.0 136 1.0                 |
| 64 65 1.0 68 1.5                    | 135                                 |
| 65                                  | 136                                 |
| 66 67 1.0 70 1.5                    | 137 141 1.0 138 1.0 139 1.0 140 1.0 |
| 67                                  | 138                                 |
| 68 69 1.0 70 1.5                    | 139                                 |
| 69                                  | 140                                 |
| 70 71 1.0                           | 141 142 1.0 143 1.0 146 1.0         |
| 71                                  | 142                                 |
| 72 76 1.0 73 1.0 74 1.0 75 1.0      | 143 145 2.0 144 1.0                 |
| 73                                  | 144                                 |
| 74                                  | 145                                 |
| 75                                  | 146 149 1.0 147 1.0 148 1.0         |
| 76 77 1.0 78 1.0 81 1.0             | 147                                 |
| 77                                  | 148                                 |
| 78 80 2.0 79 1.0                    | 149 150 1.5 152 1.5                 |
| 79                                  | 150 151 1.0 154 1.5                 |
| 80                                  | 151                                 |
| 81 84 1.0 82 1.0 83 1.0             | 152 153 1.0 156 1.5                 |
| 82                                  | 153                                 |
| 83                                  | 154 155 1.0 158 1.5                 |
| 84 85 2.0 86 1.0                    | 155                                 |
| 85                                  | 156 157 1.0 158 1.5                 |
| 86                                  | 157                                 |
| 87 91 1.0 88 1.0 89 1.0 90 1.0      | 158 159 1.0                         |
| 88                                  | 159 160 1.0                         |
| 89                                  | 160                                 |
| 90                                  | 161 165 1.0 162 1.0 163 1.0 164 1.0 |
| 91 92 1.0 93 1.0 96 1.0             | 162                                 |
| 92                                  | 163                                 |
| 93 95 2.0 94 1.0                    | 164                                 |
| 94                                  | 165 166 1.0 167 1.0 170 1.0         |
| 95                                  | 166                                 |
| 96 99 1.0 97 1.0 98 1.0             | 167 169 2.0 168 1.0                 |
| 97                                  | 168                                 |
| 98                                  | 169                                 |
| 99 100 1.5 102 1.5                  | 170 173 1.0 171 1.0 172 1.0         |
| 100 101 1.0 104 1.5                 | 171                                 |
| 101                                 | 172                                 |
| 102 103 1.0 106 1.5                 | 173 174 2.0 175 1.0                 |
| 103                                 | 174                                 |
| 104 105 1.0 108 1.5                 | 175                                 |
| 105                                 | 176 180 1.0 177 1.0 178 1.0 179 1.0 |
| 106 107 1.0 108 1.5                 | 177                                 |
| 107                                 | 178                                 |
| 108 109 1.0                         | 179                                 |
| 109                                 | 180 181 1.0 182 1.0 185 1.0         |
| 110 114 1.0 111 1.0 112 1.0 113 1.0 | 181                                 |
| 111                                 | 182 184 2.0 183 1.0                 |
| 112                                 | 183                                 |

184  
185 188 1.0 186 1.0 187 1.0  
186  
187  
188 189 1.5 191 1.5  
189 190 1.0 192 1.0  
190  
191 194 1.5 195 1.5  
192 193 1.0 194 1.0  
193  
194 197 1.5  
195 196 1.0 199 1.5  
196  
197 198 1.0 201 1.5  
198  
199 200 1.0 201 1.5  
200  
201 202 1.0  
202  
203 207 1.0 204 1.0 205 1.0 206 1.0  
204  
205  
206  
207 208 1.0 209 1.0 211 1.0  
208  
209 210 2.0 223 1.0  
210  
211 214 1.0 212 1.0 213 1.0  
212  
213  
214 215 1.0 217 2.0  
215 216 1.0 219 2.0  
216  
217 218 1.0 221 1.0  
218  
219 220 1.0 221 1.0  
220  
221 222 1.0  
222  
223 224 1.0 225 1.0  
224  
225 226 1.0 227 1.0 229 1.0  
226  
227 228 2.0 240 1.0  
228  
229 232 1.0 230 1.0 231 1.0  
230  
231  
232 233 1.0 235 2.0  
233 234 1.0 237 1.0  
234  
235 236 1.0 239 1.0  
236  
237 238 1.0 239 2.0  
238  
239  
240 241 1.0 242 1.0  
241  
242 243 1.0 244 1.0 247 1.0  
243  
244 246 2.0 245 1.0  
245  
246  
247 250 1.0 248 1.0 249 1.0  
248  
249  
250 251 2.0 252 1.0  
251  
252  
253 257 1.0 254 1.0 255 1.0 256 1.0  
254

255  
256  
257 258 1.0 259 1.0 262 1.0  
258  
259 261 2.0 260 1.0  
260  
261  
262 265 1.0 263 1.0 264 1.0  
263  
264  
265 266 1.5 268 1.5  
266 267 1.0 270 1.5  
267  
268 269 1.0 272 1.5  
269  
270 271 1.0 274 1.5  
271  
272 273 1.0 274 1.5  
273  
274 275 1.0  
275 276 1.0  
276  
277 281 1.0 278 1.0 279 1.0 280 1.0  
278  
279  
280  
281 282 1.0 283 1.0 285 1.0  
282  
283 284 2.0 303 1.0  
284  
285 288 1.0 286 1.0 287 1.0  
286  
287  
288 291 1.0 289 1.0 290 1.0  
289  
290  
291 294 1.0 292 1.0 293 1.0  
292  
293  
294 295 1.0 296 1.5  
295  
296 297 1.5 300 1.5  
297 298 1.0 299 1.0  
298  
299  
300 301 1.0 302 1.0  
301  
302  
303 304 1.0 305 1.0  
304  
305 308 1.0 306 1.0 307 1.0  
306  
307  
308 310 2.0 309 1.0  
309  
310  
311  
312 313 1.0 314 1.0 315 1.0 350 1.0  
313  
314  
315 316 1.0 317 1.0 318 1.0  
316  
317  
318 319 1.0 320 1.0 321 1.0  
319  
320  
321 322 1.0 323 1.0 324 1.0  
322  
323  
324 325 1.0 326 1.0 327 1.0  
325

326  
 327 328 1.0 329 1.0 330 1.0  
 328  
 329  
 330 331 1.0 332 1.0 338 1.0  
 331  
 332 333 1.0 334 1.0 341 1.0  
 333  
 334 335 1.0 336 1.0 346 1.0  
 335  
 336 337 1.0 338 1.0 348 1.0  
 337  
 338 339 1.0 340 1.0

339  
 340  
 341 342 1.0 343 1.0 344 1.0  
 342  
 343  
 344 345 1.0  
 345  
 346 347 1.0  
 347  
 348 349 1.0  
 349  
 350

## DFT structures of simplified models of the complex 5b@JB $\alpha$ -man

|   |              |              |             |   |              |             |             |
|---|--------------|--------------|-------------|---|--------------|-------------|-------------|
| N | -18.22400000 | -7.98400000  | 6.68100000  | H | -24.19400000 | -2.28900000 | 14.22700000 |
| H | -17.59600000 | -8.73300000  | 6.47000000  | H | -24.59900000 | -1.35700000 | 12.94900000 |
| H | -19.02700000 | -8.04400000  | 6.08800000  | C | -23.59500000 | -0.30600000 | 14.44000000 |
| H | -17.73400000 | -7.25300000  | 6.16600000  | C | -23.41400000 | 0.11700000  | 15.74100000 |
| C | -18.51800000 | -7.80900000  | 8.09700000  | H | -23.89100000 | -0.25700000 | 16.53600000 |
| H | -18.42600000 | -8.71900000  | 8.50100000  | C | -22.70100000 | 0.49500000  | 13.63800000 |
| C | -19.92400000 | -7.26800000  | 8.25200000  | N | -22.47800000 | 1.13200000  | 15.78600000 |
| O | -20.18600000 | -6.09600000  | 7.96100000  | H | -22.16600000 | 1.61300000  | 16.62900000 |
| C | -17.53800000 | -6.87000000  | 8.77800000  | C | -22.03600000 | 1.38800000  | 14.51200000 |
| H | -16.61500000 | -7.24300000  | 8.68600000  | C | -22.40300000 | 0.54000000  | 12.26400000 |
| H | -17.58300000 | -5.97600000  | 8.33200000  | H | -22.84700000 | -0.08900000 | 11.62500000 |
| C | -17.83000000 | -6.68600000  | 10.23800000 | C | -21.09900000 | 2.32200000  | 14.05600000 |
| N | -17.89900000 | -7.74700000  | 11.11200000 | H | -20.64100000 | 2.94800000  | 14.68700000 |
| H | -17.77000000 | -8.72800000  | 10.86300000 | C | -21.47900000 | 1.47600000  | 11.81100000 |
| C | -18.06000000 | -5.57200000  | 10.97200000 | H | -21.27200000 | 1.53000000  | 10.83400000 |
| H | -18.07300000 | -4.63100000  | 10.63500000 | C | -20.83200000 | 2.34600000  | 12.70300000 |
| C | -18.15900000 | -7.29200000  | 12.32600000 | H | -20.16200000 | 2.99800000  | 12.34900000 |
| H | -18.25400000 | -7.84800000  | 13.15100000 | N | -14.15800000 | -7.75200000 | 14.89100000 |
| N | -18.27200000 | -5.97700000  | 12.26300000 | H | -13.99600000 | -7.83600000 | 13.90800000 |
| N | -20.81700000 | -8.10200000  | 8.74800000  | H | -13.41000000 | -8.18900000 | 15.39100000 |
| H | -20.50100000 | -8.98800000  | 9.14300000  | H | -14.82100000 | -8.52400000 | 14.96900000 |
| C | -22.24300000 | -7.79700000  | 8.74900000  | C | -14.50500000 | -6.40300000 | 15.34900000 |
| H | -22.37800000 | -6.91800000  | 8.29200000  | H | -13.67200000 | -5.90400000 | 15.11000000 |
| C | -22.71000000 | -7.70900000  | 10.20400000 | C | -14.66600000 | -6.15300000 | 16.85400000 |
| O | -22.89400000 | -8.73900000  | 10.85800000 | H | -14.86900000 | -6.90800000 | 17.47800000 |
| C | -23.00400000 | -8.86900000  | 7.96500000  | O | -14.54000000 | -5.00000000 | 17.28000000 |
| H | -22.93100000 | -9.74000000  | 8.45100000  | C | -15.78200000 | -5.95800000 | 14.61500000 |
| H | -23.96600000 | -8.60300000  | 7.90100000  | H | -15.71900000 | -6.23700000 | 13.65700000 |
| C | -22.46700000 | -9.05800000  | 6.56400000  | H | -16.57100000 | -6.40100000 | 15.04000000 |
| O | -21.96400000 | -8.07600000  | 5.97300000  | C | -15.99000000 | -4.45000000 | 14.66600000 |
| O | -22.55700000 | -10.19400000 | 6.05000000  | O | -15.00300000 | -3.69300000 | 14.70900000 |
| N | -22.90900000 | -6.48300000  | 10.69700000 | O | -17.16600000 | -4.03100000 | 14.65300000 |
| H | -22.73400000 | -5.67300000  | 10.10200000 | N | -14.53600000 | -5.20800000 | 20.75000000 |
| C | -23.37000000 | -6.27400000  | 12.06600000 | H | -14.78700000 | -5.16500000 | 19.78300000 |
| H | -22.77200000 | -6.82700000  | 12.64600000 | H | -14.20900000 | -6.12700000 | 20.97000000 |
| C | -24.81600000 | -6.72800000  | 12.19000000 | H | -15.47800000 | -5.30500000 | 21.13000000 |
| H | -25.08700000 | -7.32100000  | 12.94800000 | C | -13.68100000 | -4.09900000 | 21.23300000 |
| O | -25.65900000 | -6.36900000  | 11.36100000 | H | -13.08100000 | -3.81900000 | 20.48300000 |
| C | -23.27000000 | -4.79200000  | 12.45200000 | C | -12.83900000 | -4.60300000 | 22.40800000 |
| H | -23.75200000 | -4.25000000  | 11.76400000 | H | -12.07500000 | -5.22300000 | 22.22700000 |
| H | -23.70500000 | -4.66400000  | 13.34300000 | O | -13.07100000 | -4.27200000 | 23.55700000 |
| C | -21.81800000 | -4.29800000  | 12.53800000 | C | -14.53400000 | -2.89000000 | 21.62400000 |
| O | -21.02400000 | -4.99000000  | 13.20100000 | H | -14.86200000 | -3.02600000 | 22.55900000 |
| O | -21.48400000 | -3.22900000  | 11.96300000 | H | -13.95700000 | -2.07400000 | 21.58900000 |
| N | -26.94000000 | -2.23600000  | 14.07500000 | C | -15.74600000 | -2.66400000 | 20.71500000 |
| H | -26.57000000 | -2.91100000  | 13.43700000 | C | -15.65100000 | -2.78400000 | 19.33600000 |
| H | -27.44500000 | -2.70400000  | 14.80000000 | H | -14.77400000 | -3.03000000 | 18.92200000 |
| H | -27.73700000 | -1.93000000  | 13.51700000 | C | -16.97100000 | -2.29600000 | 21.27100000 |
| C | -25.98600000 | -1.21800000  | 14.53300000 | H | -17.04500000 | -2.19300000 | 22.26300000 |
| H | -25.92900000 | -1.34600000  | 15.52300000 | C | -16.76200000 | -2.56600000 | 18.51600000 |
| C | -26.54400000 | 0.16200000   | 14.17700000 | H | -16.67600000 | -2.67000000 | 17.52500000 |
| H | -26.36400000 | 0.56000000   | 13.27800000 | C | -18.10700000 | -2.06600000 | 20.46800000 |
| O | -27.21600000 | 0.78000000   | 15.00300000 | H | -18.98000000 | -1.80900000 | 20.88300000 |
| C | -24.55400000 | -1.39900000  | 13.94700000 | C | -17.99200000 | -2.20400000 | 19.07300000 |

|   |              |             |             |   |              |              |             |
|---|--------------|-------------|-------------|---|--------------|--------------|-------------|
| H | -18.78400000 | -2.04400000 | 18.48400000 | C | -13.21200000 | 1.75500000   | 25.10800000 |
| N | -8.81500000  | -5.84600000 | 16.59500000 | H | -13.82100000 | 2.53300000   | 24.95500000 |
| H | -9.06100000  | -5.49100000 | 15.69300000 | C | -13.63600000 | 0.94900000   | 26.32800000 |
| H | -8.05200000  | -6.48700000 | 16.50500000 | H | -13.87400000 | 1.44000000   | 27.16600000 |
| H | -9.56500000  | -6.53100000 | 16.68700000 | O | -13.69900000 | -0.28400000  | 26.32900000 |
| C | -8.65200000  | -4.83600000 | 17.63100000 | C | -13.23200000 | 0.89000000   | 23.85100000 |
| H | -8.17800000  | -4.07700000 | 17.18400000 | H | -12.58700000 | 0.13800000   | 23.98600000 |
| C | -7.82500000  | -5.38700000 | 18.77500000 | H | -14.15600000 | 0.52300000   | 23.74600000 |
| H | -6.94600000  | -4.96800000 | 19.00200000 | C | -12.86400000 | 1.58000000   | 22.55300000 |
| O | -8.23300000  | -6.35100000 | 19.42700000 | C | -11.87800000 | 2.50700000   | 22.34800000 |
| C | -10.00200000 | -4.37300000 | 18.17000000 | H | -11.26400000 | 2.85500000   | 23.05600000 |
| H | -10.52600000 | -5.17500000 | 18.45500000 | C | -13.50600000 | 1.39700000   | 21.28800000 |
| H | -9.84600000  | -3.77900000 | 18.95900000 | N | -11.85400000 | 2.88900000   | 21.03500000 |
| C | -10.82300000 | -3.61100000 | 17.16700000 | H | -11.20300000 | 3.55800000   | 20.62500000 |
| H | -10.31700000 | -2.80100000 | 16.87000000 | C | -12.84600000 | 2.22700000   | 20.36000000 |
| H | -11.00900000 | -4.19600000 | 16.37800000 | C | -14.56400000 | 0.59000000   | 20.84700000 |
| C | -12.12400000 | -3.18600000 | 17.79300000 | H | -15.05100000 | -0.00700000  | 21.48500000 |
| H | -12.53900000 | -3.96500000 | 18.26400000 | C | -13.21400000 | 2.28500000   | 19.00900000 |
| H | -11.95500000 | -2.45100000 | 18.44900000 | H | -12.74300000 | 2.89100000   | 18.36800000 |
| N | -13.07100000 | -2.69900000 | 16.79700000 | C | -14.92300000 | 0.63700000   | 19.50400000 |
| H | -13.80500000 | -3.33700000 | 16.48900000 | H | -15.67400000 | 0.06500000   | 19.17400000 |
| C | -13.04600000 | -1.47500000 | 16.25800000 | C | -14.24100000 | 1.48100000   | 18.60100000 |
| N | -12.11800000 | -0.58600000 | 16.61800000 | H | -14.51600000 | 1.49100000   | 17.64000000 |
| H | -11.41300000 | -0.84200000 | 17.31000000 | N | -24.90500000 | -9.48800000  | 20.03900000 |
| H | -12.09900000 | 0.34700000  | 16.20700000 | H | -24.74100000 | -10.46700000 | 20.15800000 |
| N | -13.96600000 | -1.14100000 | 15.35500000 | H | -24.89500000 | -9.03700000  | 20.93200000 |
| H | -14.67500000 | -1.82000000 | 15.08000000 | H | -25.91600000 | -9.52900000  | 19.91300000 |
| H | -13.94700000 | -0.20800000 | 14.94400000 | C | -24.09200000 | -8.84500000  | 19.01300000 |
| N | -9.60400000  | -4.86600000 | 9.68800000  | H | -23.50700000 | -9.56000000  | 18.63100000 |
| H | -9.06900000  | -5.02900000 | 10.51700000 | C | -23.21700000 | -7.76300000  | 19.63300000 |
| H | -9.12700000  | -4.20700000 | 9.10700000  | O | -23.56500000 | -7.17900000  | 20.66800000 |
| H | -10.28100000 | -4.21900000 | 10.09300000 | C | -25.00400000 | -8.24500000  | 17.92200000 |
| C | -10.05500000 | -6.06600000 | 9.00700000  | H | -25.34900000 | -8.98100000  | 17.34000000 |
| H | -9.25900000  | -6.67100000 | 9.01900000  | H | -25.77200000 | -7.77600000  | 18.35700000 |
| C | -10.42800000 | -5.80000000 | 7.55200000  | C | -24.31500000 | -7.26100000  | 17.04200000 |
| H | -10.05200000 | -5.00700000 | 7.07200000  | N | -23.24600000 | -7.60300000  | 16.24100000 |
| O | -11.19800000 | -6.57100000 | 6.97100000  | H | -22.85600000 | -8.54100000  | 16.14800000 |
| C | -11.22300000 | -6.70400000 | 9.76500000  | C | -24.50000000 | -5.93000000  | 16.87800000 |
| H | -11.59500000 | -7.44000000 | 9.19900000  | H | -25.20200000 | -5.36800000  | 17.31700000 |
| H | -10.86700000 | -7.08600000 | 10.61800000 | C | -22.80700000 | -6.52900000  | 15.61400000 |
| C | -12.36800000 | -5.77900000 | 10.12200000 | H | -22.04900000 | -6.50100000  | 14.96200000 |
| C | -13.28700000 | -5.38000000 | 9.15800000  | N | -23.53900000 | -5.49700000  | 15.99300000 |
| H | -13.17300000 | -5.68500000 | 8.21300000  | H | -23.41200000 | -4.53400000  | 15.68000000 |
| C | -12.57900000 | -5.36400000 | 11.44300000 | N | -22.06600000 | -7.49200000  | 18.98700000 |
| H | -11.94600000 | -5.66100000 | 12.15800000 | H | -21.88800000 | -7.89600000  | 18.06800000 |
| C | -14.37200000 | -4.55600000 | 9.49100000  | C | -21.07600000 | -6.61900000  | 19.60600000 |
| H | -15.02100000 | -4.26900000 | 8.78600000  | H | -21.09600000 | -6.93100000  | 20.55600000 |
| C | -13.65400000 | -4.54500000 | 11.78000000 | C | -21.46300000 | -5.13700000  | 19.60400000 |
| H | -13.78500000 | -4.24900000 | 12.72600000 | O | -20.69300000 | -4.34200000  | 20.15900000 |
| C | -14.53800000 | -4.14400000 | 10.79600000 | C | -19.67300000 | -6.81600000  | 18.97300000 |
| O | -15.59300000 | -3.32600000 | 11.11400000 | H | -19.04500000 | -6.14700000  | 19.37000000 |
| H | -15.70700000 | -3.04200000 | 12.01300000 | H | -19.35300000 | -7.74000000  | 19.18200000 |
| N | -17.04900000 | -3.65600000 | 6.14400000  | C | -19.61100000 | -6.65200000  | 17.48200000 |
| H | -16.52500000 | -4.40200000 | 6.55500000  | N | -19.76700000 | -7.71300000  | 16.60900000 |
| H | -16.94800000 | -3.68500000 | 5.15000000  | H | -19.96100000 | -8.67600000  | 16.88200000 |
| H | -16.38800000 | -2.90200000 | 6.33000000  | C | -19.32100000 | -5.57600000  | 16.71200000 |
| C | -18.42600000 | -3.52100000 | 6.62700000  | H | -19.11800000 | -4.65200000  | 17.03500000 |
| H | -18.56500000 | -4.27700000 | 7.26700000  | C | -19.62700000 | -7.28800000  | 15.36900000 |
| C | -19.43000000 | -3.63800000 | 5.47500000  | H | -19.71000000 | -7.84900000  | 14.54500000 |
| H | -20.08000000 | -4.39800000 | 5.45900000  | N | -19.35800000 | -5.99400000  | 15.40000000 |
| O | -19.44300000 | -2.80300000 | 4.56800000  | N | -22.61100000 | -4.74200000  | 19.03400000 |
| C | -18.59700000 | -2.17200000 | 7.33400000  | H | -23.11300000 | -5.40000000  | 18.43900000 |
| H | -18.32500000 | -1.44200000 | 6.70700000  | C | -23.17100000 | -3.40800000  | 19.23100000 |
| H | -19.55900000 | -2.05700000 | 7.58300000  | H | -22.46500000 | -2.93400000  | 19.75800000 |
| C | -17.75400000 | -2.06400000 | 8.59700000  | C | -24.46900000 | -3.43100000  | 20.03100000 |
| O | -17.25100000 | -3.10100000 | 9.05400000  | H | -24.84200000 | -4.29900000  | 20.36000000 |
| O | -17.60200000 | -0.95400000 | 9.14500000  | O | -25.06200000 | -2.36400000  | 20.27200000 |
| N | -11.86300000 | 2.27000000  | 25.37300000 | C | -23.43000000 | -2.72100000  | 17.88400000 |
| H | -11.63400000 | 3.12400000  | 24.90600000 | H | -24.08100000 | -3.27000000  | 17.36000000 |
| H | -11.61600000 | 2.34100000  | 26.33900000 | H | -23.81700000 | -1.81400000  | 18.05100000 |
| H | -11.06400000 | 1.71700000  | 25.06100000 | C | -22.16400000 | -2.56000000  | 17.06200000 |

|    |              |             |             |                           |              |             |             |
|----|--------------|-------------|-------------|---------------------------|--------------|-------------|-------------|
| O  | -21.24900000 | -1.85800000 | 17.53500000 | C                         | -16.16100000 | 3.75700000  | 10.79800000 |
| O  | -22.08800000 | -3.14600000 | 15.95700000 | H                         | -16.24500000 | 4.63900000  | 11.26300000 |
| N  | -19.12300000 | 4.34500000  | 23.33800000 | H                         | -16.26800000 | 3.88800000  | 9.81200000  |
| H  | -19.99700000 | 3.94500000  | 23.06300000 | O                         | -17.21800000 | 2.90100000  | 11.25800000 |
| H  | -19.24800000 | 4.87600000  | 24.17600000 | C                         | -16.75900000 | 1.59900000  | 11.64400000 |
| H  | -19.10600000 | 5.12200000  | 22.67700000 | H                         | -15.77500000 | 1.55200000  | 11.47200000 |
| C  | -17.99800000 | 3.41900000  | 23.35600000 | H                         | -17.22900000 | 0.92300000  | 11.07700000 |
| H  | -18.43700000 | 2.54800000  | 23.57500000 | C                         | -17.06800000 | 1.37800000  | 13.13600000 |
| C  | -16.95600000 | 3.79200000  | 24.40800000 | H                         | -17.82300000 | 1.97600000  | 13.40600000 |
| H  | -16.62200000 | 4.73300000  | 24.46100000 | H                         | -16.25600000 | 1.60200000  | 13.67500000 |
| O  | -16.51900000 | 2.94100000  | 25.19700000 | N                         | -17.45800000 | -0.00100000 | 13.48900000 |
| C  | -17.27300000 | 3.39400000  | 22.00200000 | H                         | -16.68800000 | -0.29000000 | 14.05800000 |
| H  | -16.89800000 | 4.30700000  | 21.84300000 | C                         | -18.68500000 | -0.17900000 | 14.29700000 |
| H  | -16.52500000 | 2.73400000  | 22.07200000 | H                         | -19.33100000 | 0.53100000  | 14.01800000 |
| C  | -18.05800000 | 3.02800000  | 20.76800000 | C                         | -19.15500000 | -1.61300000 | 13.98200000 |
| C  | -18.78500000 | 3.98900000  | 20.08200000 | H                         | -18.75700000 | -2.32000000 | 14.56700000 |
| H  | -18.82300000 | 4.92300000  | 20.43600000 | C                         | -18.85000000 | -1.74200000 | 12.48600000 |
| C  | -17.99400000 | 1.73900000  | 20.23300000 | H                         | -19.63000000 | -1.54400000 | 11.89300000 |
| H  | -17.45000000 | 1.04100000  | 20.69900000 | C                         | -17.64000000 | -0.81900000 | 12.28100000 |
| C  | -19.46200000 | 3.67200000  | 18.90800000 | H                         | -16.81100000 | -1.35700000 | 12.12900000 |
| H  | -19.98200000 | 4.37300000  | 18.41900000 | H                         | -17.79100000 | -0.21200000 | 11.50100000 |
| C  | -18.66300000 | 1.41100000  | 19.08100000 | C                         | -18.51900000 | 0.06300000  | 15.81900000 |
| H  | -18.61400000 | 0.48100000  | 18.71600000 | H                         | -19.10100000 | 0.81400000  | 16.13000000 |
| C  | -19.40800000 | 2.38100000  | 18.42700000 | H                         | -17.56700000 | 0.26100000  | 16.05100000 |
| O  | -20.07300000 | 2.06300000  | 17.27400000 | O                         | -18.89900000 | -1.09400000 | 16.54100000 |
| H  | -20.58300000 | 2.72700000  | 16.82600000 | H                         | -19.81700000 | -1.26000000 | 16.28700000 |
| N  | -16.82800000 | 7.29700000  | 16.79900000 | O                         | -20.52100000 | -1.86800000 | 14.29500000 |
| H  | -16.12600000 | 7.70700000  | 17.38200000 | H                         | -20.65600000 | -1.70600000 | 15.23300000 |
| H  | -17.12000000 | 7.96100000  | 16.11100000 | O                         | -18.64500000 | -3.07600000 | 12.03900000 |
| H  | -17.61600000 | 7.40500000  | 17.43700000 | H                         | -19.45600000 | -3.57500000 | 12.16300000 |
| C  | -16.50000000 | 5.98100000  | 16.27900000 | H                         | -11.92980000 | 2.46770000  | 9.54460000  |
| H  | -15.68500000 | 6.12000000  | 15.71700000 |                           |              |             |             |
| C  | -17.60600000 | 5.43800000  | 15.38700000 | 1 5 1.0 2 1.0 3 1.0 4 1.0 |              |             |             |
| O  | -17.57000000 | 4.27100000  | 15.00800000 | 2                         |              |             |             |
| C  | -16.17800000 | 5.01800000  | 17.41700000 | 3                         |              |             |             |
| H  | -16.94000000 | 5.03400000  | 18.06400000 | 4                         |              |             |             |
| H  | -16.08700000 | 4.10000000  | 17.03200000 | 5 6 1.0 7 1.0 9 1.0       |              |             |             |
| C  | -14.88500000 | 5.36000000  | 18.17600000 | 6                         |              |             |             |
| H  | -14.99500000 | 6.26100000  | 18.59500000 | 7 8 2.0 20 1.0            |              |             |             |
| H  | -14.74900000 | 4.67400000  | 18.89100000 | 8                         |              |             |             |
| C  | -13.63100000 | 5.38200000  | 17.25200000 | 9 12 1.0 10 1.0 11 1.0    |              |             |             |
| H  | -13.53300000 | 4.50000000  | 16.79100000 | 10                        |              |             |             |
| H  | -13.72400000 | 6.10700000  | 16.57000000 | 11                        |              |             |             |
| N  | -12.38500000 | 5.63100000  | 17.98400000 | 12 13 1.0 15 2.0          |              |             |             |
| H  | -11.72500000 | 4.85900000  | 18.07800000 | 13 14 1.0 17 1.0          |              |             |             |
| C  | -12.05800000 | 6.79800000  | 18.53400000 | 14                        |              |             |             |
| N  | -12.88800000 | 7.83600000  | 18.45100000 | 15 16 1.0 19 1.0          |              |             |             |
| H  | -13.78000000 | 7.73400000  | 17.96600000 | 16                        |              |             |             |
| H  | -12.63700000 | 8.73000000  | 18.87300000 | 17 18 1.0 19 2.0          |              |             |             |
| N  | -10.89900000 | 6.93000000  | 19.16400000 | 18                        |              |             |             |
| H  | -10.26300000 | 6.13500000  | 19.22800000 | 19                        |              |             |             |
| H  | -10.64800000 | 7.82400000  | 19.58600000 | 20 21 1.0 22 1.0          |              |             |             |
| N  | -18.56900000 | 6.26300000  | 15.01000000 | 21                        |              |             |             |
| H  | -18.68500000 | 7.15200000  | 15.49700000 | 22 23 1.0 24 1.0 26 1.0   |              |             |             |
| C  | -19.46500000 | 5.92900000  | 13.91700000 | 23                        |              |             |             |
| H  | -19.35700000 | 6.63600000  | 13.21800000 | 24 25 2.0 32 1.0          |              |             |             |
| H  | -19.16900000 | 5.04700000  | 13.54900000 | 25                        |              |             |             |
| C  | -20.91900000 | 5.83700000  | 14.30000000 | 26 29 1.0 27 1.0 28 1.0   |              |             |             |
| H  | -21.19100000 | 5.77200000  | 15.26000000 | 27                        |              |             |             |
| O  | -21.77300000 | 5.84300000  | 13.39700000 | 28                        |              |             |             |
| Zn | -18.98800000 | -4.75600000 | 13.78800000 | 29 30 2.0 31 1.0          |              |             |             |
| C  | -11.48680000 | 3.03680000  | 10.36190000 | 30                        |              |             |             |
| H  | -10.66030000 | 3.64870000  | 9.97120000  | 31                        |              |             |             |
| H  | -11.10070000 | 2.34050000  | 11.12090000 | 32 33 1.0 34 1.0          |              |             |             |
| C  | -12.56000000 | 3.94800000  | 10.98600000 | 33                        |              |             |             |
| H  | -12.68400000 | 3.74700000  | 11.95800000 | 34 35 1.0 36 1.0 39 1.0   |              |             |             |
| H  | -12.32500000 | 4.91300000  | 10.87300000 | 35                        |              |             |             |
| O  | -13.80200000 | 3.69600000  | 10.30300000 | 36 38 2.0 37 1.0          |              |             |             |
| C  | -14.81500000 | 3.08400000  | 11.12500000 | 37                        |              |             |             |
| H  | -14.56900000 | 3.21800000  | 12.08500000 | 38                        |              |             |             |
| H  | -14.84200000 | 2.10600000  | 10.92100000 | 39 42 1.0 40 1.0 41 1.0   |              |             |             |

40  
41  
42 43 2.0 44 1.0  
43  
44  
45 49 1.0 46 1.0 47 1.0 48 1.0  
46  
47  
48  
49 50 1.0 51 1.0 54 1.0  
50  
51 53 2.0 52 1.0  
52  
53  
54 57 1.0 55 1.0 56 1.0  
55  
56  
57 58 1.5 60 1.5  
58 59 1.0 61 1.0  
59  
60 63 1.5 64 1.5  
61 62 1.0 63 1.0  
62  
63 66 1.5  
64 65 1.0 68 1.5  
65  
66 67 1.0 70 1.5  
67  
68 69 1.0 70 1.5  
69  
70 71 1.0  
71  
72 76 1.0 73 1.0 74 1.0 75 1.0  
73  
74  
75  
76 77 1.0 78 1.0 81 1.0  
77  
78 80 2.0 79 1.0  
79  
80  
81 84 1.0 82 1.0 83 1.0  
82  
83  
84 85 2.0 86 1.0  
85  
86  
87 91 1.0 88 1.0 89 1.0 90 1.0  
88  
89  
90  
91 92 1.0 93 1.0 96 1.0  
92  
93 95 2.0 94 1.0  
94  
95  
96 99 1.0 97 1.0 98 1.0  
97  
98  
99 100 1.5 102 1.5  
100 101 1.0 104 1.5  
101  
102 103 1.0 106 1.5  
103  
104 105 1.0 108 1.5  
105  
106 107 1.0 108 1.5  
107  
108 109 1.0  
109  
110 114 1.0 111 1.0 112 1.0 113 1.0

111  
112  
113  
114 115 1.0 116 1.0 119 1.0  
115  
116 118 2.0 117 1.0  
117  
118  
119 122 1.0 120 1.0 121 1.0  
120  
121  
122 125 1.0 123 1.0 124 1.0  
123  
124  
125 128 1.0 126 1.0 127 1.0  
126  
127  
128 129 1.0 130 1.5  
129  
130 131 1.5 134 1.5  
131 132 1.0 133 1.0  
132  
133  
134 135 1.0 136 1.0  
135  
136  
137 141 1.0 138 1.0 139 1.0 140 1.0  
138  
139  
140  
141 142 1.0 143 1.0 146 1.0  
142  
143 145 2.0 144 1.0  
144  
145  
146 149 1.0 147 1.0 148 1.0  
147  
148  
149 150 1.5 152 1.5  
150 151 1.0 154 1.5  
151  
152 153 1.0 156 1.5  
153  
154 155 1.0 158 1.5  
155  
156 157 1.0 158 1.5  
157  
158 159 1.0  
159 160 1.0  
160  
161 165 1.0 162 1.0 163 1.0 164 1.0  
162  
163  
164  
165 166 1.0 167 1.0 170 1.0  
166  
167 169 2.0 168 1.0  
168  
169  
170 173 1.0 171 1.0 172 1.0  
171  
172  
173 174 2.0 175 1.0  
174  
175  
176 180 1.0 177 1.0 178 1.0 179 1.0  
177  
178  
179  
180 181 1.0 182 1.0 185 1.0  
181



182 184 2.0 183 1.0  
183  
184  
185 188 1.0 186 1.0 187 1.0  
186  
187  
188 189 1.5 191 1.5  
189 190 1.0 192 1.0  
190  
191 194 1.5 195 1.5  
192 193 1.0 194 1.0  
193  
194 197 1.5  
195 196 1.0 199 1.5  
196  
197 198 1.0 201 1.5  
198  
199 200 1.0 201 1.5  
200  
201 202 1.0  
202  
203 207 1.0 204 1.0 205 1.0 206 1.0  
204  
205  
206  
207 208 1.0 209 1.0 211 1.0  
208  
209 210 2.0 223 1.0  
210  
211 214 1.0 212 1.0 213 1.0  
212  
213  
214 215 1.0 217 2.0  
215 216 1.0 219 2.0  
216  
217 218 1.0 221 1.0  
218  
219 220 1.0 221 1.0  
220  
221 222 1.0  
222  
223 224 1.0 225 1.0  
224  
225 226 1.0 227 1.0 229 1.0  
226  
227 228 2.0 240 1.0  
228  
229 232 1.0 230 1.0 231 1.0  
230  
231  
232 233 1.0 235 2.0  
233 234 1.0 237 1.0  
234  
235 236 1.0 239 1.0  
236  
237 238 1.0 239 2.0  
238  
239  
240 241 1.0 242 1.0  
241  
242 243 1.0 244 1.0 247 1.0  
243  
244 246 2.0 245 1.0  
245  
246  
247 250 1.0 248 1.0 249 1.0  
248  
249  
250 251 2.0 252 1.0  
251  
252

253 257 1.0 254 1.0 255 1.0 256 1.0  
254  
255  
256  
257 258 1.0 259 1.0 262 1.0  
258  
259 261 2.0 260 1.0  
260  
261  
262 265 1.0 263 1.0 264 1.0  
263  
264  
265 266 1.5 268 1.5  
266 267 1.0 270 1.5  
267  
268 269 1.0 272 1.5  
269  
270 271 1.0 274 1.5  
271  
272 273 1.0 274 1.5  
273  
274 275 1.0  
275 276 1.0  
276  
277 281 1.0 278 1.0 279 1.0 280 1.0  
278  
279  
280  
281 282 1.0 283 1.0 285 1.0  
282  
283 284 2.0 303 1.0  
284  
285 288 1.0 286 1.0 287 1.0  
286  
287  
288 291 1.0 289 1.0 290 1.0  
289  
290  
291 294 1.0 292 1.0 293 1.0  
292  
293  
294 295 1.0 296 1.5  
295  
296 297 1.5 300 1.5  
297 298 1.0 299 1.0  
298  
299  
300 301 1.0 302 1.0  
301  
302  
303 304 1.0 305 1.0  
304  
305 308 1.0 306 1.0 307 1.0  
306  
307  
308 310 2.0 309 1.0  
309  
310  
311  
312 313 1.0 314 1.0 315 1.0 352 1.0  
313  
314  
315 316 1.0 317 1.0 318 1.0  
316  
317  
318 319 1.0  
319 320 1.0 321 1.0 322 1.0  
320  
321  
322 323 1.0 324 1.0 325 1.0  
323

324  
325 326 1.0  
326 327 1.0 328 1.0 329 1.0  
327  
328  
329 330 1.0 331 1.0 332 1.0  
330  
331  
332 333 1.0 334 1.0 340 1.0  
333  
334 335 1.0 336 1.0 343 1.0  
335  
336 337 1.0 338 1.0 348 1.0  
337  
338 339 1.0 340 1.0 350 1.0

339  
340 341 1.0 342 1.0  
341  
342  
343 344 1.0 345 1.0 346 1.0  
344  
345  
346 347 1.0  
347  
348 349 1.0  
349  
350 351 1.0  
351  
352

## Molecular Docking of 5a(DAB-1)<sub>1</sub> and 5b(DAB-1)<sub>1</sub>

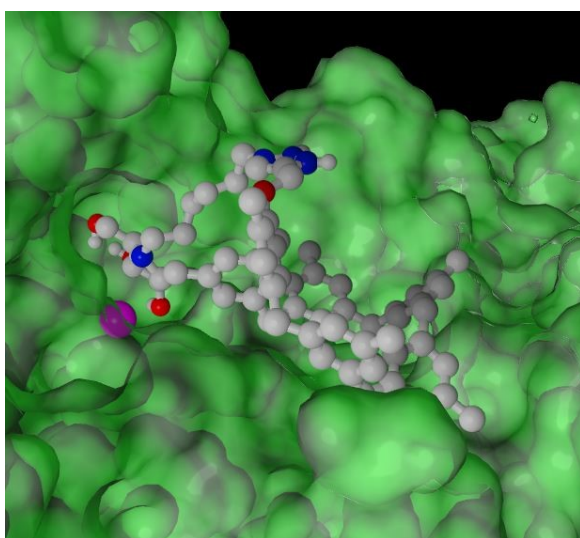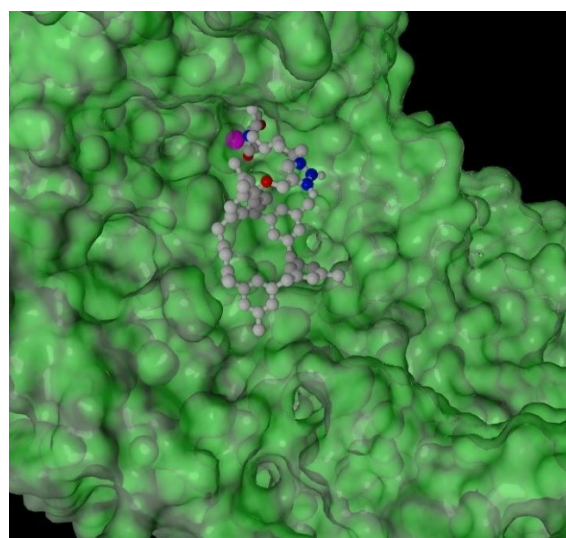

**Figure S50:** 3D model of the interaction between **5a(DAB-1)<sub>1</sub>** and Zn atom (magenta). The protein is represented by green molecular surface.

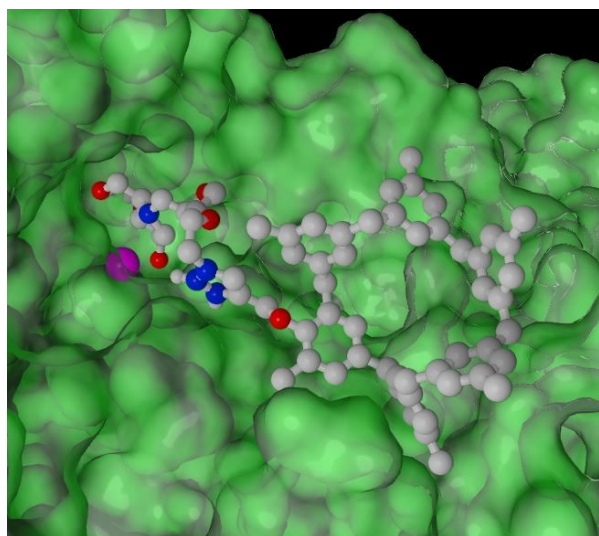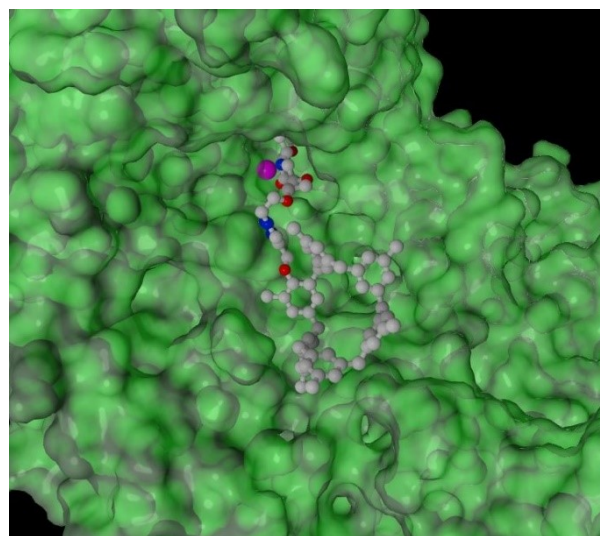

**Figure S51:** 3D model of the interaction between **5b(DAB-1)<sub>1</sub>** and Zn atom (magenta). The protein is represented by green molecular surface.

## Biological Assays

### Enzyme assay

The enzyme assays of commercial enzymes were made following manufacturer recommendation using *p*-nitrophenyl- $\alpha$ -D-mannopyranoside (pNP-Man) in  $\alpha$ -mannosidase activity and *p*-nitrophenyl- $\alpha$ -D-glucopyranoside (pNP-Glc) in  $\alpha$ -glucosidase activity. The mannosidase assay of recombinant  $\alpha$ -mannosidases GMIIb and LManII were performed as described earlier.<sup>19,20</sup> The absorbance reading of released *p*-nitrophenol (pNP) at 405 nm was used for quantification of enzyme activity.

---

<sup>19</sup> I. Nemčovičová, S. Šesták, D. Rendič, M. Plšková, J. Mucha, I. B. H. Wilson, Characterisation of class I and II  $\alpha$ -mannosidases from *Drosophila melanogaster*. *Glycoconjugate J.* 2013, **9**, 899-909.

<sup>20</sup> S. Mirabella, G. D'Adamio, C. Matassini, A. Goti, S. Delgado, A. Gimeno, I. Robina, A. J. Moreno-Vargas, S. Šesták, J. Jimenez-Barbero, F. Cardona, Mechanistic Insight into the Binding of Multivalent Pyrrolidines to  $\alpha$ -Mannosidases. *Chem. Eur. J.* 2017, **23**, 14585-14596

## Kinetic studies

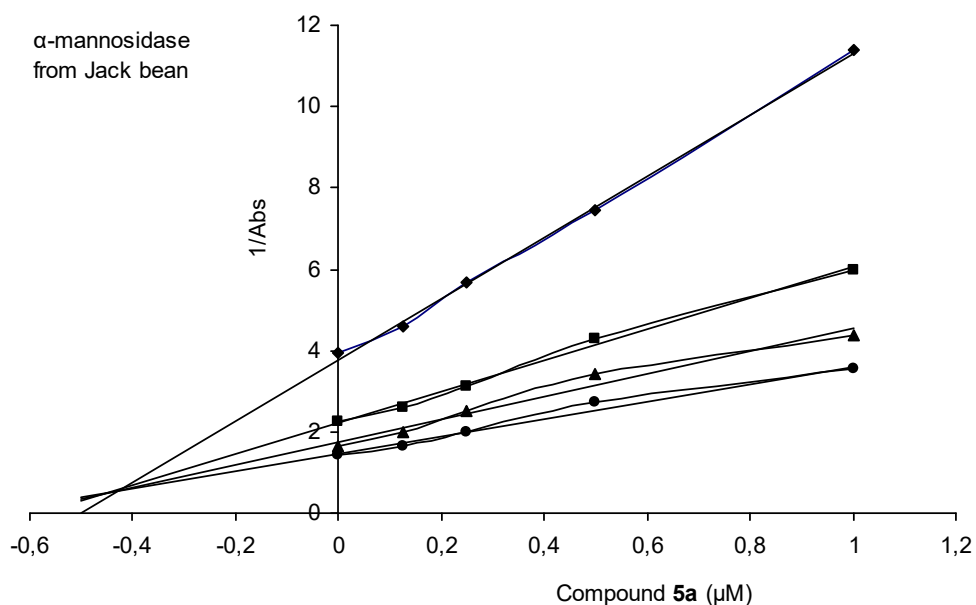

**Figure S52.** Dixon plot of the inhibition of commercial  $\alpha$ -mannosidase by the compound **5a** in the presence of *p*-nitrophenyl- $\alpha$ -D-mannopyranoside (pNP-Man). 0.5 mM ( $\blacklozenge$ ), 1 mM ( $\blacksquare$ ), 2 mM ( $\blacktriangle$ ), 4 mM ( $\bullet$ ).

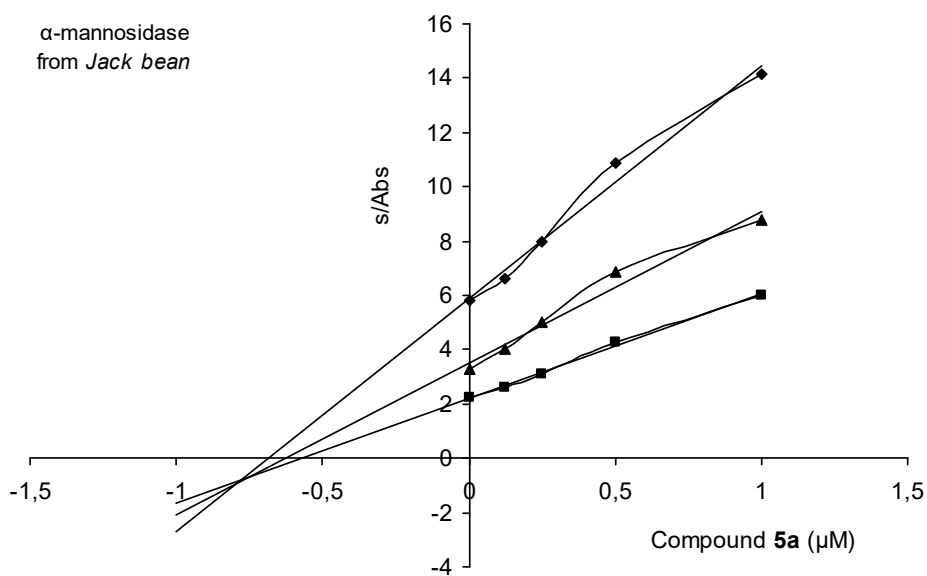

**Figure S53.** Cornish-Bowden plot<sup>21</sup> of the inhibition of commercial  $\alpha$ -mannosidase by the compound **5a** in the presence of *p*-nitrophenyl- $\alpha$ -D-mannopyranoside (pNP-Man). 0.5 mM ( $\blacksquare$ ), 1 mM ( $\blacktriangle$ ), 2 mM ( $\blacklozenge$ ).

<sup>21</sup> A. Cornish-Bowden, A Simple Graphical Method for Determining the Inhibition Constants of Mixed, Uncompetitive and Non-Competitive Inhibitors. *Biochem. J.* 1974, **137**,143-144.

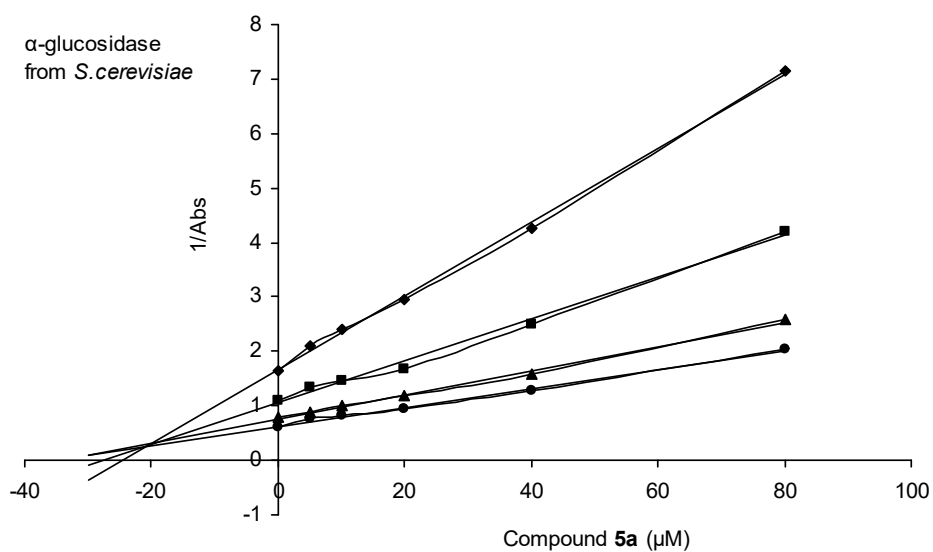

**Figure S54.** Dixon plot of the inhibition of α-glucosidase by the compound **5a** in the presence of *p*-nitrophenyl-α-D-glucopyranoside (pNP-Glc). 0.5 mM (◆), 1 mM (■), 2 mM (▲), 4 mM (●).

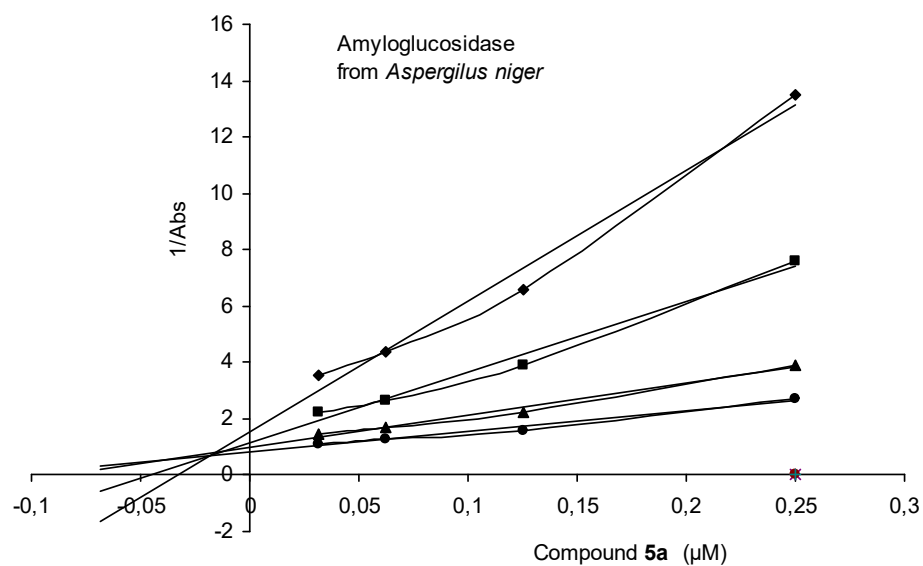

**Figure S55.** Dixon plot of the inhibition of commercial amyloglucosidase by the compound **5a** in the presence of *p*-nitrophenyl-α-D-glucopyranoside (pNP-Glc) 0.5 mM (◆), 1 mM (■), 2 mM (▲), 4 mM (●).

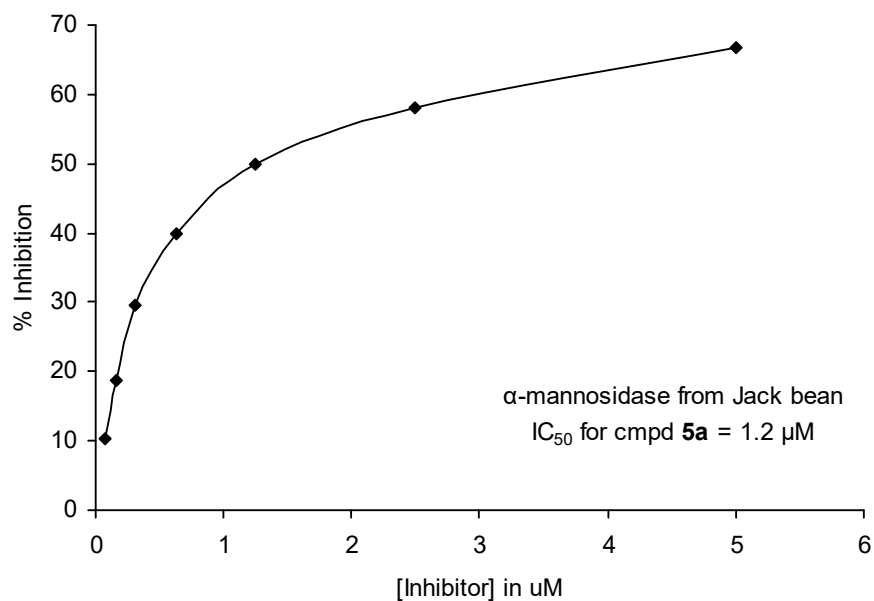

**Figure S56.** Inhibitory activity of compound **5a** toward  $\alpha$ -mannosidase expressed in  $IC_{50}$ .

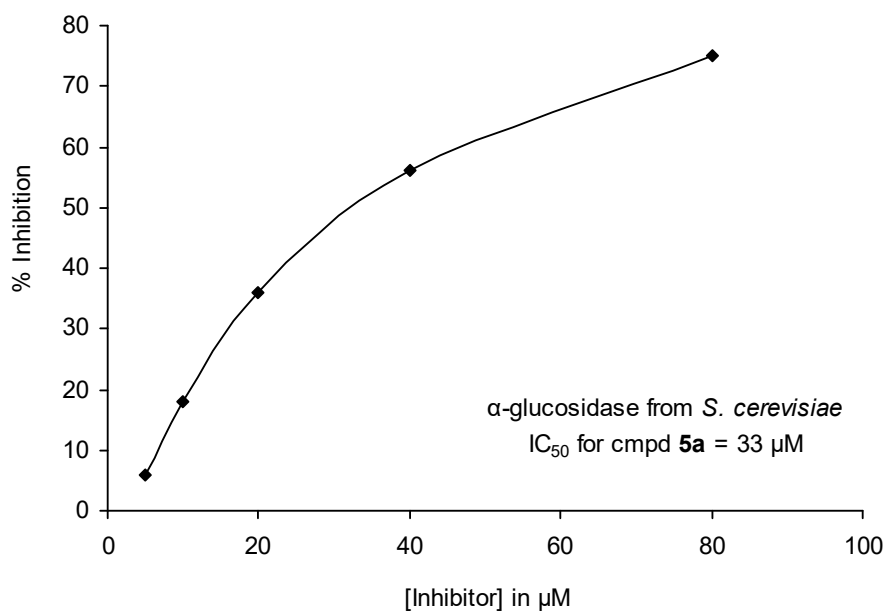

**Figure S57.** Inhibitory activity of compound **5a** toward  $\alpha$ -glucosidase expressed in  $IC_{50}$ .

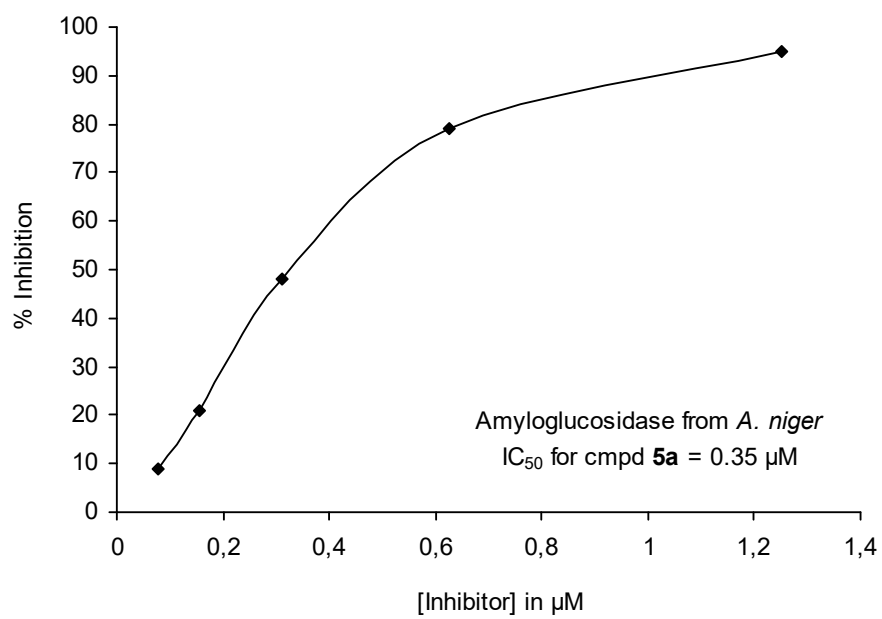

**Figure S58.** Inhibitory activity of compound **5a** toward amyloglucosidase expressed in IC<sub>50</sub>.
